# Supplementary material for: Machine Learning Model on Multi-Omics Data Enables Risk Stratification and Identifies Molecular Heterogeneity and Therapeutic Targets in Glioblastoma
Source: Research Square preprint supplement (doi:10.21203/rs.3.rs-7510857/v1), 2025-09-12
Supplement: Supplementary file 1 [file 98223fb143dd444cc78dc9e5.xlsx]

## Sheet: Sequences of shRNAs and siRNAs
shRNA/siRNA	sequence
PDIA4-sh1	CCTGAGAGAAGATTACAAATT
PDIA4-sh2	GCAAGGTGTCAAACGATGCTA
si-EIF3I-1	GAUCAACGACAUCCAGUUA
si-EIF3I-2	GAACGUCCUGUCAACUCAG
si-RFT1-1	CGAGCGAUAUGUGAUGACA
si-RFT1-2	GACUAACGCUGCUUUACUC

## Sheet: RT-qPCR primer sequences
Primer	Sequence
PDIA4-F	CCAGCAGGTTTGATGTGAGTGG
PDIA4-R	GGAGACTTCTCTGACCTTGGCA
RFT1-F	CTCAACCTGCTGTGGCTAACAG
RFT1-R	CCAAACAGCACCACTCCAGTTG
EIF3I-F	CAGAACGTCCTGTCAACTCAGC
EIF3I-R	CTTGCCAATCCTGGTGGAGGTT
GAPDH-F	GTCTCCTCTGACTTCAACAGCG
GAPDH-R	ACCACCCTGTTGCTGTAGCCAA
