# Supplementary material for: Machine Learning Model on Multi-Omics Data Enables Risk Stratification and Identifies Molecular Heterogeneity and Therapeutic Targets in Glioblastoma
Source: Research Square preprint supplement (doi:10.21203/rs.3.rs-7510857/v1), 2025-09-12
Supplement: Supplementary file 2 [file c3f270bdf8f480cf1323cef7.xlsx]

## Sheet: Sheet1
ID	Radiomics	Pathomics	Genomics	Bulk Transcriptomics	Protein	Singel Cell Transcriptomics	Spatial Transcriptomics	CNS5_Subtype	CNS5_Grade	Survival Status	OS (Months)
FAHZZU_0043	Yes	Yes	No	No	No	No	No	Glioblastoma	G4	Dead	2
FAHZZU_0225	Yes	Yes	No	No	No	No	No	Glioblastoma	G4	Dead	2
FAHZZU_0484	No	Yes	No	No	No	No	No	Glioblastoma	G4	Dead	2
FAHZZU_0539	Yes	Yes	No	No	No	No	No	Glioblastoma	G4	Dead	2
FAHZZU_0977	Yes	Yes	Yes	Yes	Yes	No	No	Glioblastoma	G4	Dead	2
FAHZZU_1158	No	Yes	Yes	Yes	Yes	No	No	Glioblastoma	G4	Dead	2
FAHZZU_1178	No	No	No	No	No	Yes	Yes	Glioblastoma	G4	Dead	2
FAHZZU_0236	Yes	Yes	No	No	No	No	No	Glioblastoma	G4	Dead	2.1
FAHZZU_0947	Yes	Yes	Yes	Yes	Yes	No	No	Glioblastoma	G4	Dead	2.3
FAHZZU_0124	Yes	Yes	No	No	No	No	No	Glioblastoma	G4	Dead	2.4
FAHZZU_0143	No	Yes	No	No	No	No	No	Glioblastoma	G4	Dead	2.4
FAHZZU_0545	No	Yes	No	No	No	No	No	Glioblastoma	G4	Dead	2.47
FAHZZU_0115	Yes	Yes	No	No	No	No	No	Glioblastoma	G4	Dead	2.5
FAHZZU_0875	No	Yes	No	No	No	No	No	Glioblastoma	G4	Dead	2.53
FAHZZU_0502	Yes	Yes	No	No	No	No	No	Glioblastoma	G4	Dead	2.6
FAHZZU_0134	Yes	Yes	No	No	No	No	No	Glioblastoma	G4	Dead	2.7
FAHZZU_0737	No	Yes	No	No	No	No	No	Glioblastoma	G4	Dead	2.7
FAHZZU_0445	No	Yes	No	No	No	No	No	Glioblastoma	G4	Dead	2.77
FAHZZU_0168	Yes	Yes	No	No	No	No	No	Glioblastoma	G4	Dead	2.9
FAHZZU_0175	Yes	Yes	No	No	No	No	No	Glioblastoma	G4	Dead	2.9
FAHZZU_0304	Yes	Yes	No	No	No	No	No	Glioblastoma	G4	Dead	2.97
FAHZZU_0132	Yes	Yes	No	No	No	No	No	Glioblastoma	G4	Dead	3
FAHZZU_0369	No	Yes	No	No	No	No	No	Glioblastoma	G4	Dead	3
FAHZZU_0390	No	Yes	No	No	No	No	No	Glioblastoma	G4	Dead	3
FAHZZU_0429	No	Yes	No	No	No	No	No	Glioblastoma	G4	Dead	3
FAHZZU_0432	No	Yes	No	No	No	No	No	Glioblastoma	G4	Dead	3
FAHZZU_0507	Yes	Yes	No	No	No	No	No	Glioblastoma	G4	Dead	3
FAHZZU_0727	No	Yes	No	No	No	No	No	Glioblastoma	G4	Dead	3
FAHZZU_0812	Yes	Yes	No	No	No	No	No	Glioblastoma	G4	Dead	3
FAHZZU_0824	Yes	Yes	No	No	No	No	No	Glioblastoma	G4	Dead	3
FAHZZU_0928	Yes	Yes	No	Yes	No	No	No	Glioblastoma	G4	Dead	3
FAHZZU_0962	Yes	Yes	No	Yes	No	No	No	Glioblastoma	G4	Dead	3
FAHZZU_1133	Yes	Yes	Yes	Yes	Yes	No	No	Glioblastoma	G4	Dead	3
FAHZZU_0435	No	Yes	No	No	No	No	No	Glioblastoma	G4	Dead	3.1
FAHZZU_0596	Yes	Yes	No	No	No	No	No	Glioblastoma	G4	Dead	3.1
FAHZZU_0722	Yes	Yes	No	No	No	No	No	Glioblastoma	G4	Dead	3.1
FAHZZU_0475	Yes	Yes	No	No	No	No	No	Glioblastoma	G4	Dead	3.13
FAHZZU_0121	No	Yes	No	No	No	No	No	Glioblastoma	G4	Dead	3.2
FAHZZU_0827	Yes	Yes	No	No	No	No	No	Glioblastoma	G4	Dead	3.2
FAHZZU_0971	Yes	Yes	No	No	No	No	No	Glioblastoma	G4	Alive	3.2
FAHZZU_0479	No	Yes	No	No	No	No	No	Glioblastoma	G4	Dead	3.27
FAHZZU_0364	Yes	Yes	No	No	No	No	No	Glioblastoma	G4	Dead	3.3
FAHZZU_0450	Yes	Yes	No	No	No	No	No	Glioblastoma	G4	Dead	3.3
FAHZZU_0555	Yes	Yes	No	No	No	No	No	Glioblastoma	G4	Dead	3.3
FAHZZU_1081	Yes	Yes	No	No	No	No	No	Glioblastoma	G4	Dead	3.3
FAHZZU_1142	Yes	Yes	Yes	Yes	Yes	No	No	Glioblastoma	G4	Dead	3.3
FAHZZU_0118	Yes	Yes	No	No	No	No	No	Glioblastoma	G4	Dead	3.4
FAHZZU_0638	No	Yes	No	No	No	No	No	Glioblastoma	G4	Dead	3.4
FAHZZU_0697	Yes	Yes	No	No	No	No	No	Glioblastoma	G4	Dead	3.4
FAHZZU_0711	Yes	Yes	No	No	No	No	No	Glioblastoma	G4	Dead	3.4
FAHZZU_0411	Yes	Yes	Yes	Yes	Yes	No	No	Glioblastoma	G4	Dead	3.5
FAHZZU_0899	Yes	Yes	No	No	No	No	No	Glioblastoma	G4	Dead	3.5
FAHZZU_0999	Yes	Yes	Yes	Yes	Yes	No	No	Glioblastoma	G4	Dead	3.5
FAHZZU_0494	No	Yes	No	No	No	No	No	Glioblastoma	G4	Dead	3.53
FAHZZU_0058	Yes	Yes	No	No	No	No	No	Glioblastoma	G4	Dead	3.6
FAHZZU_0062	Yes	Yes	No	No	No	No	No	Glioblastoma	G4	Dead	3.6
FAHZZU_0422	Yes	Yes	No	No	No	No	No	Glioblastoma	G4	Dead	3.6
FAHZZU_0964	Yes	Yes	No	No	No	No	No	Glioblastoma	G4	Dead	3.6
FAHZZU_1034	Yes	Yes	No	No	No	No	No	Glioblastoma	G4	Dead	3.6
FAHZZU_0873	Yes	Yes	Yes	Yes	Yes	No	No	Glioblastoma	G4	Dead	3.7
FAHZZU_0066	Yes	Yes	No	No	No	No	No	Glioblastoma	G4	Dead	3.8
FAHZZU_0074	No	Yes	No	No	No	No	No	Glioblastoma	G4	Dead	3.8
FAHZZU_0820	Yes	Yes	No	No	No	No	No	Glioblastoma	G4	Dead	3.8
FAHZZU_0718	Yes	Yes	No	No	No	No	No	Glioblastoma	G4	Dead	3.9
FAHZZU_0207	Yes	Yes	No	No	No	No	No	Glioblastoma	G4	Dead	4
FAHZZU_0309	Yes	Yes	No	No	No	No	No	Glioblastoma	G4	Dead	4
FAHZZU_0328	Yes	Yes	No	No	No	No	No	Glioblastoma	G4	Dead	4
FAHZZU_0371	No	Yes	No	No	No	No	No	Glioblastoma	G4	Dead	4
FAHZZU_0517	Yes	Yes	No	No	No	No	No	Glioblastoma	G4	Dead	4
FAHZZU_0523	Yes	Yes	No	No	No	No	No	Glioblastoma	G4	Dead	4
FAHZZU_0831	Yes	Yes	No	No	No	No	No	Glioblastoma	G4	Dead	4
FAHZZU_0865	Yes	No	No	Yes	No	No	No	Glioblastoma	G4	Dead	4
FAHZZU_0886	Yes	Yes	No	Yes	No	No	No	Glioblastoma	G4	Dead	4
FAHZZU_0908	Yes	Yes	Yes	Yes	Yes	No	No	Glioblastoma	G4	Dead	4
FAHZZU_0921	Yes	Yes	Yes	Yes	Yes	No	No	Glioblastoma	G4	Dead	4
FAHZZU_0930	Yes	Yes	Yes	Yes	Yes	No	No	Glioblastoma	G4	Dead	4
FAHZZU_0937	Yes	Yes	No	No	No	No	No	Glioblastoma	G4	Dead	4
FAHZZU_0941	Yes	Yes	No	No	No	No	No	Glioblastoma	G4	Dead	4
FAHZZU_0946	Yes	Yes	Yes	Yes	Yes	No	No	Glioblastoma	G4	Dead	4
FAHZZU_0993	Yes	Yes	No	No	No	No	No	Glioblastoma	G4	Dead	4
FAHZZU_1104	Yes	Yes	No	No	No	No	No	Glioblastoma	G4	Dead	4
FAHZZU_1162	No	No	No	No	No	Yes	No	Glioblastoma	G4	Dead	4
FAHZZU_0894	No	Yes	No	No	No	No	No	Glioblastoma	G4	Dead	4.03
FAHZZU_0029	No	Yes	No	No	No	No	No	Glioblastoma	G4	Dead	4.1
FAHZZU_0044	Yes	Yes	No	No	No	No	No	Glioblastoma	G4	Dead	4.1
FAHZZU_0221	No	Yes	No	No	No	No	No	Glioblastoma	G4	Dead	4.1
FAHZZU_0234	Yes	Yes	No	No	No	No	No	Glioblastoma	G4	Dead	4.1
FAHZZU_0501	No	Yes	No	No	No	No	No	Glioblastoma	G4	Dead	4.1
FAHZZU_0178	Yes	Yes	No	No	No	No	No	Glioblastoma	G4	Dead	4.2
FAHZZU_0247	No	Yes	No	No	No	No	No	Glioblastoma	G4	Dead	4.2
FAHZZU_0898	Yes	Yes	Yes	Yes	Yes	No	No	Glioblastoma	G4	Dead	4.2
FAHZZU_0162	Yes	Yes	No	No	No	No	No	Glioblastoma	G4	Dead	4.3
FAHZZU_0235	No	Yes	No	No	No	No	No	Glioblastoma	G4	Dead	4.3
FAHZZU_0347	Yes	Yes	No	No	No	No	No	Glioblastoma	G4	Dead	4.3
FAHZZU_0725	Yes	Yes	No	No	No	No	No	Glioblastoma	G4	Dead	4.3
FAHZZU_0951	Yes	Yes	No	No	No	No	No	Glioblastoma	G4	Alive	4.3
FAHZZU_1100	Yes	Yes	No	No	No	No	No	Glioblastoma	G4	Dead	4.37
FAHZZU_0165	No	Yes	No	No	No	No	No	Glioblastoma	G4	Dead	4.4
FAHZZU_0679	Yes	Yes	No	No	No	No	No	Glioblastoma	G4	Dead	4.4
FAHZZU_0834	Yes	Yes	No	No	No	No	No	Glioblastoma	G4	Dead	4.4
FAHZZU_0242	Yes	Yes	No	No	No	No	No	Glioblastoma	G4	Dead	4.5
FAHZZU_0252	No	Yes	No	No	No	No	No	Glioblastoma	G4	Dead	4.5
FAHZZU_0632	Yes	Yes	No	No	No	No	No	Glioblastoma	G4	Dead	4.5
FAHZZU_0616	Yes	Yes	No	No	No	No	No	Glioblastoma	G4	Dead	4.6
FAHZZU_0735	Yes	Yes	No	No	No	No	No	Glioblastoma	G4	Dead	4.6
FAHZZU_0866	Yes	Yes	Yes	Yes	Yes	No	No	Glioblastoma	G4	Dead	4.6
FAHZZU_0089	No	Yes	No	No	No	No	No	Glioblastoma	G4	Dead	4.8
FAHZZU_0867	Yes	Yes	No	Yes	No	No	No	Glioblastoma	G4	Dead	4.8
FAHZZU_0922	Yes	No	Yes	Yes	Yes	No	No	Glioblastoma	G4	Dead	4.8
FAHZZU_0203	Yes	Yes	No	No	No	No	No	Glioblastoma	G4	Dead	4.9
FAHZZU_0602	Yes	Yes	No	No	No	No	No	Glioblastoma	G4	Dead	4.9
FAHZZU_0160	No	Yes	No	No	No	No	No	Glioblastoma	G4	Dead	5
FAHZZU_0201	Yes	Yes	No	No	No	No	No	Glioblastoma	G4	Dead	5
FAHZZU_0206	No	Yes	No	No	No	No	No	Glioblastoma	G4	Dead	5
FAHZZU_0215	Yes	Yes	No	No	No	No	No	Glioblastoma	G4	Dead	5
FAHZZU_0264	Yes	No	No	No	No	No	No	Glioblastoma	G4	Dead	5
FAHZZU_0283	Yes	Yes	No	No	No	No	No	Glioblastoma	G4	Dead	5
FAHZZU_0341	No	Yes	No	No	No	No	No	Glioblastoma	G4	Dead	5
FAHZZU_0456	Yes	Yes	No	No	No	No	No	Glioblastoma	G4	Dead	5
FAHZZU_0510	No	Yes	No	No	No	No	No	Glioblastoma	G4	Dead	5
FAHZZU_0736	Yes	Yes	No	No	No	No	No	Glioblastoma	G4	Dead	5
FAHZZU_0795	Yes	Yes	No	No	No	No	No	Glioblastoma	G4	Dead	5
FAHZZU_0805	No	Yes	No	No	No	No	No	Glioblastoma	G4	Dead	5
FAHZZU_0829	Yes	Yes	No	No	No	No	No	Glioblastoma	G4	Dead	5
FAHZZU_0858	Yes	Yes	No	Yes	No	No	No	Glioblastoma	G4	Dead	5
FAHZZU_1000	Yes	Yes	Yes	Yes	Yes	No	No	Glioblastoma	G4	Dead	5
FAHZZU_1099	Yes	Yes	No	No	No	No	No	Glioblastoma	G4	Dead	5
FAHZZU_1171	No	No	No	No	No	Yes	Yes	Glioblastoma	G4	Dead	5
FAHZZU_0370	No	Yes	No	No	No	No	No	Glioblastoma	G4	Dead	5.03
FAHZZU_1005	Yes	Yes	No	No	No	No	No	Glioblastoma	G4	Dead	5.03
FAHZZU_0011	Yes	Yes	No	No	No	No	No	Glioblastoma	G4	Dead	5.1
FAHZZU_0222	Yes	Yes	No	No	No	No	No	Glioblastoma	G4	Dead	5.1
FAHZZU_0251	No	Yes	No	No	No	No	No	Glioblastoma	G4	Dead	5.1
FAHZZU_0577	Yes	Yes	No	No	No	No	No	Glioblastoma	G4	Dead	5.1
FAHZZU_0967	No	Yes	No	No	No	No	No	Glioblastoma	G4	Dead	5.1
FAHZZU_0164	Yes	Yes	No	No	No	No	No	Glioblastoma	G4	Dead	5.2
FAHZZU_0472	Yes	Yes	No	No	No	No	No	Glioblastoma	G4	Dead	5.2
FAHZZU_0774	No	Yes	No	No	No	No	No	Glioblastoma	G4	Dead	5.2
FAHZZU_0953	Yes	Yes	Yes	Yes	Yes	No	No	Glioblastoma	G4	Dead	5.2
FAHZZU_0603	Yes	Yes	No	No	No	No	No	Glioblastoma	G4	Dead	5.4
FAHZZU_0771	Yes	Yes	No	No	No	No	No	Glioblastoma	G4	Dead	5.4
FAHZZU_1037	Yes	Yes	No	No	No	No	No	Glioblastoma	G4	Dead	5.4
FAHZZU_1068	Yes	Yes	No	No	No	No	No	Glioblastoma	G4	Dead	5.47
FAHZZU_0438	Yes	Yes	No	No	No	No	No	Glioblastoma	G4	Dead	5.5
FAHZZU_0681	Yes	Yes	No	No	No	No	No	Glioblastoma	G4	Dead	5.5
FAHZZU_0756	Yes	Yes	No	No	No	No	No	Glioblastoma	G4	Dead	5.5
FAHZZU_0468	No	Yes	No	No	No	No	No	Glioblastoma	G4	Dead	5.53
FAHZZU_0615	No	Yes	No	No	No	No	No	Glioblastoma	G4	Dead	5.57
FAHZZU_0122	Yes	Yes	No	No	No	No	No	Glioblastoma	G4	Dead	5.7
FAHZZU_0522	Yes	Yes	No	No	No	No	No	Glioblastoma	G4	Dead	5.7
FAHZZU_1046	Yes	Yes	No	No	No	No	No	Glioblastoma	G4	Dead	5.7
FAHZZU_0156	No	Yes	No	No	No	No	No	Glioblastoma	G4	Dead	5.8
FAHZZU_0763	No	Yes	No	No	No	No	No	Glioblastoma	G4	Dead	5.83
FAHZZU_0028	No	Yes	No	No	No	No	No	Glioblastoma	G4	Dead	5.9
FAHZZU_0580	Yes	No	No	No	No	No	No	Glioblastoma	G4	Dead	5.9
FAHZZU_0008	Yes	No	No	No	No	No	No	Glioblastoma	G4	Dead	6
FAHZZU_0048	Yes	Yes	No	No	No	No	No	Glioblastoma	G4	Dead	6
FAHZZU_0110	Yes	Yes	No	No	No	No	No	Glioblastoma	G4	Dead	6
FAHZZU_0120	Yes	Yes	No	No	No	No	No	Glioblastoma	G4	Dead	6
FAHZZU_0138	Yes	Yes	No	No	No	No	No	Glioblastoma	G4	Dead	6
FAHZZU_0223	Yes	Yes	No	No	No	No	No	Glioblastoma	G4	Dead	6
FAHZZU_0228	No	Yes	No	No	No	No	No	Glioblastoma	G4	Dead	6
FAHZZU_0286	Yes	Yes	No	No	No	No	No	Glioblastoma	G4	Dead	6
FAHZZU_0302	No	Yes	No	No	No	No	No	Glioblastoma	G4	Dead	6
FAHZZU_0322	Yes	Yes	No	No	No	No	No	Glioblastoma	G4	Dead	6
FAHZZU_0380	No	Yes	No	No	No	No	No	Glioblastoma	G4	Dead	6
FAHZZU_0443	Yes	Yes	No	No	No	No	No	Glioblastoma	G4	Dead	6
FAHZZU_0467	Yes	Yes	No	No	No	No	No	Glioblastoma	G4	Dead	6
FAHZZU_0505	Yes	Yes	No	No	No	No	No	Glioblastoma	G4	Dead	6
FAHZZU_0512	Yes	Yes	No	No	No	No	No	Glioblastoma	G4	Dead	6
FAHZZU_0628	Yes	Yes	No	No	No	No	No	Glioblastoma	G4	Dead	6
FAHZZU_0769	Yes	Yes	No	No	No	No	No	Glioblastoma	G4	Dead	6
FAHZZU_0840	Yes	Yes	No	No	No	No	No	Glioblastoma	G4	Dead	6
FAHZZU_0920	Yes	Yes	No	No	No	No	No	Glioblastoma	G4	Alive	6
FAHZZU_1098	Yes	Yes	No	No	No	No	No	Glioblastoma	G4	Dead	6
FAHZZU_1114	No	Yes	Yes	Yes	Yes	No	No	Glioblastoma	G4	Dead	6
FAHZZU_0516	Yes	Yes	No	No	No	No	No	Glioblastoma	G4	Dead	6.1
FAHZZU_1116	Yes	Yes	Yes	Yes	Yes	No	No	Glioblastoma	G4	Dead	6.1
FAHZZU_0086	No	Yes	No	No	No	No	No	Glioblastoma	G4	Dead	6.2
FAHZZU_0776	Yes	Yes	Yes	Yes	Yes	No	No	Glioblastoma	G4	Dead	6.2
FAHZZU_0913	Yes	Yes	No	Yes	No	No	No	Glioblastoma	G4	Dead	6.2
FAHZZU_0001	No	Yes	No	No	No	No	No	Glioblastoma	G4	Dead	6.3
FAHZZU_0012	No	Yes	No	No	No	No	No	Glioblastoma	G4	Dead	6.3
FAHZZU_0202	Yes	Yes	No	No	No	No	No	Glioblastoma	G4	Dead	6.3
FAHZZU_0449	Yes	Yes	No	No	No	No	No	Glioblastoma	G4	Dead	6.4
FAHZZU_0844	Yes	Yes	No	No	No	No	No	Glioblastoma	G4	Dead	6.4
FAHZZU_1069	No	Yes	No	No	No	No	No	Glioblastoma	G4	Dead	6.43
FAHZZU_0576	Yes	Yes	No	No	No	No	No	Glioblastoma	G4	Dead	6.47
FAHZZU_0007	Yes	Yes	No	No	No	No	No	Glioblastoma	G4	Dead	6.5
FAHZZU_0232	Yes	Yes	No	No	No	No	No	Glioblastoma	G4	Dead	6.5
FAHZZU_0275	No	Yes	No	No	No	No	No	Glioblastoma	G4	Dead	6.5
FAHZZU_0842	Yes	Yes	Yes	Yes	Yes	No	No	Glioblastoma	G4	Dead	6.5
FAHZZU_0968	Yes	Yes	Yes	Yes	Yes	No	No	Glioblastoma	G4	Dead	6.5
FAHZZU_1053	Yes	Yes	Yes	Yes	Yes	No	No	Glioblastoma	G4	Dead	6.5
FAHZZU_1164	No	No	No	No	No	Yes	No	Glioblastoma	G4	Dead	6.5
FAHZZU_1180	No	No	No	No	No	Yes	Yes	Glioblastoma	G4	Dead	6.5
FAHZZU_1181	No	No	No	No	No	Yes	Yes	Glioblastoma	G4	Dead	6.5
FAHZZU_1185	No	No	No	No	No	Yes	No	Glioblastoma	G4	Dead	6.5
FAHZZU_0013	No	Yes	No	No	No	No	No	Glioblastoma	G4	Dead	6.6
FAHZZU_0036	No	Yes	No	No	No	No	No	Glioblastoma	G4	Dead	6.6
FAHZZU_0111	No	Yes	No	No	No	No	No	Glioblastoma	G4	Dead	6.6
FAHZZU_1006	Yes	Yes	No	No	No	No	No	Glioblastoma	G4	Dead	6.6
FAHZZU_1014	Yes	Yes	Yes	Yes	Yes	No	No	Glioblastoma	G4	Dead	6.6
FAHZZU_0107	Yes	Yes	No	No	No	No	No	Glioblastoma	G4	Dead	6.7
FAHZZU_0610	No	Yes	No	No	No	No	No	Glioblastoma	G4	Dead	6.7
FAHZZU_0855	Yes	Yes	No	No	No	No	No	Glioblastoma	G4	Dead	6.7
FAHZZU_1036	Yes	Yes	No	No	No	No	No	Glioblastoma	G4	Alive	6.7
FAHZZU_0339	No	Yes	No	No	No	No	No	Glioblastoma	G4	Dead	6.77
FAHZZU_0141	Yes	Yes	No	No	No	No	No	Glioblastoma	G4	Dead	6.8
FAHZZU_0209	Yes	Yes	No	No	No	No	No	Glioblastoma	G4	Dead	6.8
FAHZZU_0694	Yes	Yes	No	No	No	No	No	Glioblastoma	G4	Dead	6.8
FAHZZU_1016	Yes	Yes	No	No	No	No	No	Glioblastoma	G4	Dead	6.8
FAHZZU_1018	Yes	Yes	Yes	Yes	Yes	No	No	Glioblastoma	G4	Dead	6.8
FAHZZU_0150	Yes	Yes	No	No	No	No	No	Glioblastoma	G4	Dead	6.9
FAHZZU_0152	Yes	Yes	No	No	No	No	No	Glioblastoma	G4	Dead	6.9
FAHZZU_0174	Yes	Yes	No	No	No	No	No	Glioblastoma	G4	Dead	6.9
FAHZZU_0415	Yes	Yes	No	No	No	No	No	Glioblastoma	G4	Dead	6.9
FAHZZU_0796	Yes	Yes	No	No	No	No	No	Glioblastoma	G4	Dead	6.9
FAHZZU_0123	Yes	Yes	No	No	No	No	No	Glioblastoma	G4	Dead	7
FAHZZU_0189	Yes	Yes	No	No	No	No	No	Glioblastoma	G4	Dead	7
FAHZZU_0361	No	Yes	No	No	No	No	No	Glioblastoma	G4	Dead	7
FAHZZU_0384	No	Yes	No	No	No	No	No	Glioblastoma	G4	Dead	7
FAHZZU_0389	Yes	No	No	No	No	No	No	Glioblastoma	G4	Dead	7
FAHZZU_0568	Yes	Yes	No	No	No	No	No	Glioblastoma	G4	Dead	7
FAHZZU_0916	Yes	Yes	Yes	Yes	Yes	No	No	Glioblastoma	G4	Dead	7
FAHZZU_0974	Yes	Yes	No	No	No	No	No	Glioblastoma	G4	Dead	7
FAHZZU_0149	Yes	Yes	No	No	No	No	No	Glioblastoma	G4	Dead	7.2
FAHZZU_0646	No	Yes	No	No	No	No	No	Glioblastoma	G4	Dead	7.23
FAHZZU_0856	No	Yes	No	No	No	No	No	Glioblastoma	G4	Dead	7.23
FAHZZU_0009	No	Yes	No	No	No	No	No	Glioblastoma	G4	Dead	7.3
FAHZZU_0095	Yes	Yes	No	No	No	No	No	Glioblastoma	G4	Dead	7.3
FAHZZU_0243	Yes	Yes	Yes	Yes	Yes	No	No	Glioblastoma	G4	Alive	7.3
FAHZZU_0440	No	Yes	No	No	No	No	No	Glioblastoma	G4	Dead	7.3
FAHZZU_0508	Yes	Yes	No	No	No	No	No	Glioblastoma	G4	Dead	7.3
FAHZZU_0558	Yes	Yes	No	No	No	No	No	Glioblastoma	G4	Dead	7.3
FAHZZU_0923	Yes	Yes	No	No	No	No	No	Glioblastoma	G4	Dead	7.3
FAHZZU_0942	Yes	Yes	Yes	Yes	Yes	No	No	Glioblastoma	G4	Dead	7.3
FAHZZU_0631	Yes	Yes	No	No	No	No	No	Glioblastoma	G4	Dead	7.4
FAHZZU_0634	Yes	Yes	No	No	No	No	No	Glioblastoma	G4	Dead	7.5
FAHZZU_0127	Yes	Yes	No	No	No	No	No	Glioblastoma	G4	Dead	7.6
FAHZZU_0514	Yes	Yes	No	No	No	No	No	Glioblastoma	G4	Dead	7.6
FAHZZU_0546	Yes	Yes	No	No	No	No	No	Glioblastoma	G4	Dead	7.6
FAHZZU_0892	Yes	Yes	Yes	Yes	Yes	No	No	Glioblastoma	G4	Dead	7.67
FAHZZU_0131	Yes	Yes	No	No	No	No	No	Glioblastoma	G4	Dead	7.7
FAHZZU_0157	Yes	Yes	No	No	No	No	No	Glioblastoma	G4	Dead	7.7
FAHZZU_0067	No	Yes	No	No	No	No	No	Glioblastoma	G4	Dead	7.8
FAHZZU_0884	Yes	Yes	Yes	Yes	Yes	No	No	Glioblastoma	G4	Dead	7.8
FAHZZU_1002	Yes	Yes	Yes	Yes	No	No	No	Glioblastoma	G4	Dead	7.8
FAHZZU_1033	Yes	No	No	No	No	No	No	Glioblastoma	G4	Alive	7.8
FAHZZU_1022	Yes	Yes	No	No	No	No	No	Glioblastoma	G4	Dead	7.9
FAHZZU_0064	No	Yes	No	No	No	No	No	Glioblastoma	G4	Dead	8
FAHZZU_0181	Yes	Yes	No	No	No	No	No	Glioblastoma	G4	Dead	8
FAHZZU_0186	No	Yes	No	No	No	No	No	Glioblastoma	G4	Dead	8
FAHZZU_0237	Yes	Yes	No	No	No	No	No	Glioblastoma	G4	Dead	8
FAHZZU_0269	Yes	Yes	No	No	No	No	No	Glioblastoma	G4	Dead	8
FAHZZU_0299	Yes	Yes	No	No	No	No	No	Glioblastoma	G4	Dead	8
FAHZZU_0665	Yes	Yes	No	No	No	No	No	Glioblastoma	G4	Dead	8
FAHZZU_0852	Yes	Yes	No	No	No	No	No	Glioblastoma	G4	Dead	8
FAHZZU_0907	Yes	Yes	Yes	Yes	Yes	No	No	Glioblastoma	G4	Dead	8
FAHZZU_0931	Yes	Yes	Yes	Yes	Yes	No	No	Glioblastoma	G4	Dead	8
FAHZZU_0975	Yes	Yes	No	No	No	No	No	Glioblastoma	G4	Dead	8
FAHZZU_1184	No	No	No	No	No	Yes	Yes	Glioblastoma	G4	Dead	8
FAHZZU_0316	Yes	Yes	No	No	No	No	No	Glioblastoma	G4	Dead	8.1
FAHZZU_1050	Yes	Yes	No	No	No	No	No	Glioblastoma	G4	Dead	8.2
FAHZZU_0880	Yes	Yes	Yes	Yes	Yes	No	No	Glioblastoma	G4	Dead	8.3
FAHZZU_0200	Yes	Yes	No	No	No	No	No	Glioblastoma	G4	Dead	8.4
FAHZZU_0333	Yes	Yes	No	No	No	No	No	Glioblastoma	G4	Dead	8.4
FAHZZU_0078	No	Yes	No	No	No	No	No	Glioblastoma	G4	Dead	8.5
FAHZZU_0854	Yes	Yes	No	No	No	No	No	Glioblastoma	G4	Alive	8.5
FAHZZU_1012	Yes	No	No	No	No	No	No	Glioblastoma	G4	Alive	8.5
FAHZZU_0063	Yes	Yes	No	No	No	No	No	Glioblastoma	G4	Dead	8.6
FAHZZU_0199	Yes	Yes	No	No	No	No	No	Glioblastoma	G4	Dead	8.6
FAHZZU_0259	Yes	Yes	No	No	No	No	No	Glioblastoma	G4	Dead	8.6
FAHZZU_1001	Yes	Yes	Yes	Yes	Yes	No	No	Glioblastoma	G4	Dead	8.6
FAHZZU_1010	Yes	Yes	Yes	Yes	Yes	No	No	Glioblastoma	G4	Dead	8.6
FAHZZU_0527	Yes	Yes	No	No	No	No	No	Glioblastoma	G4	Dead	8.7
FAHZZU_0084	Yes	Yes	No	No	No	No	No	Glioblastoma	G4	Dead	8.8
FAHZZU_0760	Yes	Yes	Yes	Yes	Yes	No	No	Glioblastoma	G4	Dead	8.8
FAHZZU_1019	Yes	No	Yes	Yes	Yes	No	No	Glioblastoma	G4	Dead	8.8
FAHZZU_0373	Yes	Yes	No	No	No	No	No	Glioblastoma	G4	Dead	8.9
FAHZZU_0933	Yes	Yes	Yes	Yes	Yes	No	No	Glioblastoma	G4	Dead	8.95
FAHZZU_1031	No	Yes	No	No	No	No	No	Glioblastoma	G4	Dead	8.97
FAHZZU_0068	Yes	Yes	No	No	No	No	No	Glioblastoma	G4	Dead	9
FAHZZU_0191	Yes	Yes	No	No	No	No	No	Glioblastoma	G4	Dead	9
FAHZZU_0197	Yes	Yes	No	No	No	No	No	Glioblastoma	G4	Dead	9
FAHZZU_0324	Yes	Yes	No	No	No	No	No	Glioblastoma	G4	Alive	9
FAHZZU_0349	Yes	Yes	No	No	No	No	No	Glioblastoma	G4	Dead	9
FAHZZU_0353	Yes	Yes	No	No	No	No	No	Glioblastoma	G4	Dead	9
FAHZZU_0402	Yes	Yes	No	No	No	No	No	Glioblastoma	G4	Dead	9
FAHZZU_0529	Yes	Yes	No	No	No	No	No	Glioblastoma	G4	Dead	9
FAHZZU_0688	Yes	Yes	No	No	No	No	No	Glioblastoma	G4	Dead	9
FAHZZU_0690	Yes	Yes	No	No	No	No	No	Glioblastoma	G4	Dead	9
FAHZZU_0841	Yes	Yes	No	No	No	No	No	Glioblastoma	G4	Alive	9
FAHZZU_0845	Yes	Yes	No	Yes	No	No	No	Glioblastoma	G4	Dead	9
FAHZZU_0926	Yes	Yes	Yes	Yes	Yes	No	No	Glioblastoma	G4	Dead	9
FAHZZU_0969	No	Yes	No	No	No	No	No	Glioblastoma	G4	Dead	9
FAHZZU_1072	Yes	Yes	No	No	No	No	No	Glioblastoma	G4	Dead	9
FAHZZU_0183	Yes	Yes	No	No	No	No	No	Glioblastoma	G4	Dead	9.1
FAHZZU_0935	Yes	Yes	Yes	Yes	Yes	No	No	Glioblastoma	G4	Dead	9.1
FAHZZU_0987	Yes	Yes	No	No	No	No	No	Glioblastoma	G4	Dead	9.1
FAHZZU_1090	Yes	Yes	No	No	No	No	No	Glioblastoma	G4	Dead	9.1
FAHZZU_1027	No	Yes	No	No	No	No	No	Glioblastoma	G4	Dead	9.13
FAHZZU_1093	Yes	No	No	No	No	No	No	Glioblastoma	G4	Alive	9.15
FAHZZU_0216	Yes	Yes	No	No	No	No	No	Glioblastoma	G4	Dead	9.2
FAHZZU_0392	No	Yes	No	No	No	No	No	Glioblastoma	G4	Dead	9.2
FAHZZU_0071	Yes	Yes	No	No	No	No	No	Glioblastoma	G4	Dead	9.3
FAHZZU_0407	No	Yes	No	No	No	No	No	Glioblastoma	G4	Dead	9.3
FAHZZU_0660	Yes	Yes	No	No	No	No	No	Glioblastoma	G4	Dead	9.3
FAHZZU_0869	No	Yes	No	No	No	No	No	Glioblastoma	G4	Dead	9.3
FAHZZU_0167	Yes	Yes	No	No	No	No	No	Glioblastoma	G4	Dead	9.4
FAHZZU_0696	Yes	Yes	No	No	No	No	No	Glioblastoma	G4	Dead	9.4
FAHZZU_0882	Yes	Yes	Yes	Yes	Yes	No	No	Glioblastoma	G4	Dead	9.4
FAHZZU_0069	No	Yes	No	No	No	No	No	Glioblastoma	G4	Dead	9.5
FAHZZU_0145	Yes	Yes	No	No	No	No	No	Glioblastoma	G4	Dead	9.5
FAHZZU_0241	Yes	Yes	No	No	No	No	No	Glioblastoma	G4	Dead	9.5
FAHZZU_0423	Yes	Yes	No	No	No	No	No	Glioblastoma	G4	Dead	9.5
FAHZZU_0826	Yes	Yes	No	No	No	No	No	Glioblastoma	G4	Dead	9.5
FAHZZU_0613	Yes	Yes	No	No	No	No	No	Glioblastoma	G4	Dead	9.6
FAHZZU_0070	Yes	Yes	No	No	No	No	No	Glioblastoma	G4	Dead	9.7
FAHZZU_0585	No	Yes	No	No	No	No	No	Glioblastoma	G4	Dead	9.7
FAHZZU_0823	Yes	Yes	No	No	No	No	No	Glioblastoma	G4	Alive	9.7
FAHZZU_0952	Yes	Yes	No	No	No	No	No	Glioblastoma	G4	Dead	9.8
FAHZZU_1084	Yes	No	No	No	No	No	No	Glioblastoma	G4	Alive	9.8
FAHZZU_0041	Yes	Yes	No	No	No	No	No	Glioblastoma	G4	Dead	9.9
FAHZZU_0506	Yes	Yes	No	No	No	No	No	Glioblastoma	G4	Dead	9.9
FAHZZU_0657	Yes	Yes	No	No	No	No	No	Glioblastoma	G4	Dead	9.9
FAHZZU_0731	Yes	Yes	No	No	No	No	No	Glioblastoma	G4	Dead	9.9
FAHZZU_0749	Yes	Yes	No	No	No	No	No	Glioblastoma	G4	Dead	9.9
FAHZZU_0297	Yes	Yes	No	No	No	No	No	Glioblastoma	G4	Dead	9.93
FAHZZU_0050	No	Yes	No	No	No	No	No	Glioblastoma	G4	Dead	10
FAHZZU_0196	Yes	Yes	No	No	No	No	No	Glioblastoma	G4	Dead	10
FAHZZU_0210	Yes	Yes	No	No	No	No	No	Glioblastoma	G4	Dead	10
FAHZZU_0562	Yes	Yes	No	No	No	No	No	Glioblastoma	G4	Dead	10
FAHZZU_0581	Yes	Yes	No	No	No	No	No	Glioblastoma	G4	Dead	10
FAHZZU_0706	Yes	Yes	No	No	No	No	No	Glioblastoma	G4	Dead	10
FAHZZU_0764	No	Yes	No	No	No	No	No	Glioblastoma	G4	Dead	10
FAHZZU_0978	Yes	Yes	Yes	Yes	Yes	No	No	Glioblastoma	G4	Dead	10
FAHZZU_1088	Yes	Yes	No	No	No	No	No	Glioblastoma	G4	Dead	10
FAHZZU_1134	Yes	Yes	Yes	Yes	Yes	No	No	Glioblastoma	G4	Dead	10
FAHZZU_0027	No	Yes	No	No	No	No	No	Glioblastoma	G4	Dead	10.1
FAHZZU_0250	No	Yes	No	No	No	No	No	Glioblastoma	G4	Dead	10.1
FAHZZU_0454	Yes	Yes	No	No	No	No	No	Glioblastoma	G4	Dead	10.1
FAHZZU_0515	Yes	Yes	No	No	No	No	No	Glioblastoma	G4	Dead	10.1
FAHZZU_1149	No	Yes	Yes	Yes	Yes	No	No	Glioblastoma	G4	Dead	10.1
FAHZZU_1026	Yes	Yes	No	No	No	No	No	Glioblastoma	G4	Dead	10.13
FAHZZU_0047	No	Yes	No	No	No	No	No	Glioblastoma	G4	Dead	10.2
FAHZZU_0789	Yes	Yes	No	No	No	No	No	Glioblastoma	G4	Dead	10.2
FAHZZU_0924	Yes	Yes	Yes	Yes	Yes	No	No	Glioblastoma	G4	Dead	10.2
FAHZZU_0363	Yes	Yes	No	No	No	No	No	Glioblastoma	G4	Dead	10.3
FAHZZU_0485	Yes	Yes	No	No	No	No	No	Glioblastoma	G4	Dead	10.3
FAHZZU_0624	Yes	Yes	No	No	No	No	No	Glioblastoma	G4	Dead	10.3
FAHZZU_0713	Yes	Yes	No	No	No	No	No	Glioblastoma	G4	Dead	10.3
FAHZZU_1024	Yes	Yes	Yes	Yes	Yes	No	No	Glioblastoma	G4	Dead	10.3
FAHZZU_0057	Yes	Yes	No	No	No	No	No	Glioblastoma	G4	Dead	10.5
FAHZZU_0433	Yes	Yes	No	No	No	No	No	Glioblastoma	G4	Dead	10.5
FAHZZU_0544	Yes	Yes	No	No	No	No	No	Glioblastoma	G4	Dead	10.5
FAHZZU_0599	Yes	Yes	No	No	No	No	No	Glioblastoma	G4	Dead	10.5
FAHZZU_0757	Yes	Yes	No	No	No	No	No	Glioblastoma	G4	Dead	10.5
FAHZZU_0793	Yes	Yes	No	No	No	No	No	Glioblastoma	G4	Dead	10.5
FAHZZU_1124	Yes	Yes	Yes	Yes	Yes	No	No	Glioblastoma	G4	Dead	10.5
FAHZZU_1129	Yes	Yes	Yes	Yes	Yes	No	No	Glioblastoma	G4	Dead	10.5
FAHZZU_0348	Yes	Yes	No	No	No	No	No	Glioblastoma	G4	Dead	10.6
FAHZZU_0362	Yes	Yes	No	No	No	No	No	Glioblastoma	G4	Dead	10.6
FAHZZU_0444	Yes	Yes	No	No	No	No	No	Glioblastoma	G4	Dead	10.6
FAHZZU_0520	Yes	Yes	No	No	No	No	No	Glioblastoma	G4	Dead	10.6
FAHZZU_0647	No	Yes	No	No	No	No	No	Glioblastoma	G4	Dead	10.63
FAHZZU_0970	Yes	Yes	No	No	No	No	No	Glioblastoma	G4	Dead	10.7
FAHZZU_1105	Yes	No	No	No	No	No	No	Glioblastoma	G4	Alive	10.7
FAHZZU_0159	No	Yes	No	No	No	No	No	Glioblastoma	G4	Dead	10.8
FAHZZU_0163	No	Yes	No	No	No	No	No	Glioblastoma	G4	Dead	10.8
FAHZZU_0343	Yes	Yes	No	No	No	No	No	Glioblastoma	G4	Dead	10.8
FAHZZU_0403	Yes	Yes	No	No	No	No	No	Glioblastoma	G4	Dead	10.8
FAHZZU_0800	Yes	Yes	No	No	No	No	No	Glioblastoma	G4	Dead	10.8
FAHZZU_0814	Yes	Yes	No	No	No	No	No	Glioblastoma	G4	Dead	10.8
FAHZZU_0910	Yes	Yes	Yes	Yes	Yes	No	No	Glioblastoma	G4	Dead	10.8
FAHZZU_0986	Yes	Yes	Yes	Yes	Yes	No	No	Glioblastoma	G4	Dead	10.9
FAHZZU_0128	No	Yes	No	No	No	No	No	Glioblastoma	G4	Dead	11
FAHZZU_0224	No	Yes	No	No	No	No	No	Glioblastoma	G4	Dead	11
FAHZZU_0279	Yes	Yes	No	No	No	No	No	Glioblastoma	G4	Dead	11
FAHZZU_0314	Yes	Yes	No	No	No	No	No	Glioblastoma	G4	Dead	11
FAHZZU_0317	Yes	Yes	No	No	No	No	No	Glioblastoma	G4	Dead	11
FAHZZU_0335	Yes	Yes	No	No	No	No	No	Glioblastoma	G4	Dead	11
FAHZZU_0340	Yes	Yes	No	No	No	No	No	Glioblastoma	G4	Dead	11
FAHZZU_0357	No	Yes	No	No	No	No	No	Glioblastoma	G4	Dead	11
FAHZZU_0518	Yes	Yes	No	No	No	No	No	Glioblastoma	G4	Dead	11
FAHZZU_1117	No	Yes	Yes	Yes	Yes	No	No	Glioblastoma	G4	Dead	11
FAHZZU_0961	Yes	Yes	Yes	Yes	Yes	No	No	Glioblastoma	G4	Dead	11.1
FAHZZU_0463	Yes	Yes	No	No	No	No	No	Glioblastoma	G4	Dead	11.17
FAHZZU_0294	Yes	Yes	No	No	No	No	No	Glioblastoma	G4	Dead	11.2
FAHZZU_0890	Yes	Yes	Yes	Yes	Yes	No	No	Glioblastoma	G4	Dead	11.2
FAHZZU_0902	Yes	Yes	Yes	Yes	Yes	No	No	Glioblastoma	G4	Dead	11.2
FAHZZU_1109	Yes	Yes	No	No	No	No	No	Glioblastoma	G4	Dead	11.27
FAHZZU_0410	No	Yes	No	No	No	No	No	Glioblastoma	G4	Dead	11.3
FAHZZU_0582	Yes	Yes	No	No	No	No	No	Glioblastoma	G4	Dead	11.3
FAHZZU_0772	Yes	Yes	No	No	No	No	No	Glioblastoma	G4	Dead	11.3
FAHZZU_1057	Yes	Yes	No	No	No	No	No	Glioblastoma	G4	Dead	11.3
FAHZZU_1059	Yes	No	No	No	No	No	No	Glioblastoma	G4	Alive	11.3
FAHZZU_0847	No	Yes	No	No	No	No	No	Glioblastoma	G4	Dead	11.33
FAHZZU_0075	Yes	Yes	No	No	No	No	No	Glioblastoma	G4	Dead	11.4
FAHZZU_0238	Yes	Yes	No	No	No	No	No	Glioblastoma	G4	Dead	11.4
FAHZZU_0586	Yes	Yes	No	No	No	No	No	Glioblastoma	G4	Dead	11.4
FAHZZU_0116	No	Yes	No	No	No	No	No	Glioblastoma	G4	Dead	11.5
FAHZZU_0129	Yes	Yes	No	No	No	No	No	Glioblastoma	G4	Dead	11.5
FAHZZU_0133	Yes	Yes	No	No	No	No	No	Glioblastoma	G4	Dead	11.5
FAHZZU_0254	Yes	Yes	No	No	No	No	No	Glioblastoma	G4	Dead	11.5
FAHZZU_0759	Yes	Yes	No	No	No	No	No	Glioblastoma	G4	Dead	11.5
FAHZZU_0108	Yes	Yes	No	No	No	No	No	Glioblastoma	G4	Dead	11.7
FAHZZU_0220	Yes	Yes	No	No	No	No	No	Glioblastoma	G4	Dead	11.7
FAHZZU_0519	Yes	Yes	No	No	No	No	No	Glioblastoma	G4	Dead	11.7
FAHZZU_0798	Yes	Yes	No	No	No	No	No	Glioblastoma	G4	Dead	11.7
FAHZZU_0109	No	Yes	No	No	No	No	No	Glioblastoma	G4	Dead	11.8
FAHZZU_0668	Yes	Yes	No	No	No	No	No	Glioblastoma	G4	Dead	11.8
FAHZZU_0691	Yes	Yes	No	No	No	No	No	Glioblastoma	G4	Dead	11.8
FAHZZU_0785	Yes	No	No	No	No	No	No	Glioblastoma	G4	Alive	11.85
FAHZZU_0073	Yes	Yes	No	No	No	No	No	Glioblastoma	G4	Dead	11.9
FAHZZU_0588	No	Yes	No	No	No	No	No	Glioblastoma	G4	Dead	11.9
FAHZZU_0838	Yes	Yes	No	No	No	No	No	Glioblastoma	G4	Dead	11.9
FAHZZU_0857	Yes	Yes	Yes	Yes	Yes	No	No	Glioblastoma	G4	Dead	11.9
FAHZZU_1092	Yes	No	No	No	No	No	No	Glioblastoma	G4	Alive	11.9
FAHZZU_1051	Yes	Yes	No	No	No	No	No	Glioblastoma	G4	Dead	11.93
FAHZZU_0010	Yes	No	No	No	No	No	No	Glioblastoma	G4	Dead	12
FAHZZU_0023	Yes	Yes	No	No	No	No	No	Glioblastoma	G4	Dead	12
FAHZZU_0148	Yes	Yes	No	No	No	No	No	Glioblastoma	G4	Dead	12
FAHZZU_0155	Yes	Yes	No	No	No	No	No	Glioblastoma	G4	Dead	12
FAHZZU_0226	No	Yes	No	No	No	No	No	Glioblastoma	G4	Dead	12
FAHZZU_0233	Yes	Yes	No	No	No	No	No	Glioblastoma	G4	Dead	12
FAHZZU_0273	Yes	Yes	No	No	No	No	No	Glioblastoma	G4	Dead	12
FAHZZU_0308	Yes	Yes	No	No	No	No	No	Glioblastoma	G4	Dead	12
FAHZZU_0378	No	Yes	No	No	No	No	No	Glioblastoma	G4	Dead	12
FAHZZU_0397	No	Yes	No	No	No	No	No	Glioblastoma	G4	Dead	12
FAHZZU_0437	No	Yes	No	No	No	No	No	Glioblastoma	G4	Dead	12
FAHZZU_0452	No	Yes	No	No	No	No	No	Glioblastoma	G4	Dead	12
FAHZZU_0481	Yes	Yes	No	No	No	No	No	Glioblastoma	G4	Dead	12
FAHZZU_0540	Yes	Yes	No	No	No	No	No	Glioblastoma	G4	Dead	12
FAHZZU_0654	Yes	Yes	No	No	No	No	No	Glioblastoma	G4	Alive	12
FAHZZU_0670	Yes	Yes	No	No	No	No	No	Glioblastoma	G4	Dead	12
FAHZZU_0705	Yes	Yes	No	No	No	No	No	Glioblastoma	G4	Dead	12
FAHZZU_0709	Yes	Yes	No	No	No	No	No	Glioblastoma	G4	Dead	12
FAHZZU_0872	Yes	Yes	Yes	Yes	Yes	No	No	Glioblastoma	G4	Dead	12
FAHZZU_0887	Yes	Yes	Yes	Yes	Yes	No	No	Glioblastoma	G4	Dead	12
FAHZZU_0963	Yes	Yes	Yes	Yes	Yes	No	No	Glioblastoma	G4	Dead	12
FAHZZU_0053	No	Yes	No	No	No	No	No	Glioblastoma	G4	Dead	12.1
FAHZZU_0158	Yes	Yes	No	No	No	No	No	Glioblastoma	G4	Dead	12.1
FAHZZU_0274	Yes	Yes	No	No	No	No	No	Glioblastoma	G4	Dead	12.1
FAHZZU_0408	Yes	Yes	No	No	No	No	No	Glioblastoma	G4	Dead	12.1
FAHZZU_0567	Yes	Yes	No	No	No	No	No	Glioblastoma	G4	Dead	12.1
FAHZZU_0569	Yes	Yes	No	No	No	No	No	Glioblastoma	G4	Dead	12.17
FAHZZU_0570	Yes	Yes	No	No	No	No	No	Glioblastoma	G4	Dead	12.2
FAHZZU_0652	Yes	Yes	No	No	No	No	No	Glioblastoma	G4	Dead	12.2
FAHZZU_1108	Yes	No	No	No	No	No	No	Glioblastoma	G4	Alive	12.2
FAHZZU_0354	No	Yes	No	No	No	No	No	Glioblastoma	G4	Dead	12.23
FAHZZU_0664	No	Yes	No	No	No	No	No	Glioblastoma	G4	Dead	12.27
FAHZZU_0119	Yes	Yes	No	No	No	No	No	Glioblastoma	G4	Dead	12.3
FAHZZU_0193	Yes	Yes	No	No	No	No	No	Glioblastoma	G4	Dead	12.3
FAHZZU_0318	Yes	Yes	No	No	No	No	No	Glioblastoma	G4	Dead	12.3
FAHZZU_0430	No	Yes	No	No	No	No	No	Glioblastoma	G4	Dead	12.3
FAHZZU_1087	Yes	Yes	No	No	No	No	No	Glioblastoma	G4	Dead	12.3
FAHZZU_0305	No	Yes	No	No	No	No	No	Glioblastoma	G4	Dead	12.33
FAHZZU_0536	No	Yes	No	No	No	No	No	Glioblastoma	G4	Dead	12.33
FAHZZU_1056	Yes	Yes	No	No	No	No	No	Glioblastoma	G4	Dead	12.37
FAHZZU_1071	Yes	Yes	No	No	No	No	No	Glioblastoma	G4	Dead	12.37
FAHZZU_0051	Yes	Yes	No	No	No	No	No	Glioblastoma	G4	Dead	12.4
FAHZZU_0142	No	Yes	No	No	No	No	No	Glioblastoma	G4	Dead	12.4
FAHZZU_0622	No	Yes	No	No	No	No	No	Glioblastoma	G4	Dead	12.4
FAHZZU_0821	Yes	Yes	Yes	Yes	Yes	No	No	Glioblastoma	G4	Dead	12.4
FAHZZU_0427	No	Yes	No	No	No	No	No	Glioblastoma	G4	Dead	12.5
FAHZZU_0457	Yes	Yes	No	No	No	No	No	Glioblastoma	G4	Dead	12.5
FAHZZU_0503	Yes	Yes	No	No	No	No	No	Glioblastoma	G4	Dead	12.5
FAHZZU_1135	Yes	Yes	Yes	Yes	Yes	No	No	Glioblastoma	G4	Dead	12.5
FAHZZU_0035	No	Yes	No	No	No	No	No	Glioblastoma	G4	Dead	12.6
FAHZZU_1086	Yes	No	No	No	No	No	No	Glioblastoma	G4	Alive	12.6
FAHZZU_0034	Yes	Yes	No	No	No	No	No	Glioblastoma	G4	Dead	12.7
FAHZZU_0451	Yes	Yes	No	No	No	No	No	Glioblastoma	G4	Dead	12.7
FAHZZU_0487	Yes	Yes	No	No	No	No	No	Glioblastoma	G4	Dead	12.8
FAHZZU_0015	Yes	No	No	No	No	No	No	Glioblastoma	G4	Dead	12.9
FAHZZU_0033	Yes	Yes	No	No	No	No	No	Glioblastoma	G4	Dead	12.9
FAHZZU_0919	Yes	Yes	Yes	Yes	Yes	No	No	Glioblastoma	G4	Dead	12.9
FAHZZU_0261	Yes	Yes	No	No	No	No	No	Glioblastoma	G4	Dead	13
FAHZZU_0289	Yes	Yes	No	No	No	No	No	Glioblastoma	G4	Dead	13
FAHZZU_0307	Yes	Yes	No	No	No	No	No	Glioblastoma	G4	Dead	13
FAHZZU_0352	Yes	Yes	No	No	No	No	No	Glioblastoma	G4	Dead	13
FAHZZU_0572	No	Yes	No	No	No	No	No	Glioblastoma	G4	Dead	13
FAHZZU_0685	Yes	Yes	No	No	No	No	No	Glioblastoma	G4	Dead	13
FAHZZU_0768	Yes	Yes	No	No	No	No	No	Glioblastoma	G4	Alive	13
FAHZZU_1077	Yes	Yes	No	No	No	No	No	Glioblastoma	G4	Dead	13
FAHZZU_1141	Yes	Yes	Yes	Yes	Yes	No	No	Glioblastoma	G4	Dead	13
FAHZZU_1049	Yes	Yes	No	No	No	No	No	Glioblastoma	G4	Dead	13.13
FAHZZU_0267	Yes	Yes	No	No	No	No	No	Glioblastoma	G4	Dead	13.2
FAHZZU_0495	Yes	Yes	No	No	No	No	No	Glioblastoma	G4	Dead	13.2
FAHZZU_0792	Yes	Yes	No	No	No	No	No	Glioblastoma	G4	Dead	13.2
FAHZZU_0914	Yes	Yes	No	No	No	No	No	Glioblastoma	G4	Alive	13.2
FAHZZU_0532	Yes	Yes	No	No	No	No	No	Glioblastoma	G4	Dead	13.3
FAHZZU_1075	Yes	No	No	No	No	No	No	Glioblastoma	G4	Alive	13.3
FAHZZU_0412	Yes	Yes	No	No	No	No	No	Glioblastoma	G4	Dead	13.4
FAHZZU_0045	Yes	Yes	No	No	No	No	No	Glioblastoma	G4	Dead	13.5
FAHZZU_0102	Yes	Yes	No	No	No	No	No	Glioblastoma	G4	Dead	13.5
FAHZZU_0337	Yes	Yes	No	No	No	No	No	Glioblastoma	G4	Dead	13.5
FAHZZU_0455	Yes	Yes	No	No	No	No	No	Glioblastoma	G4	Dead	13.5
FAHZZU_0748	Yes	Yes	No	Yes	No	No	No	Glioblastoma	G4	Dead	13.5
FAHZZU_1066	Yes	No	No	No	No	No	No	Glioblastoma	G4	Alive	13.6
FAHZZU_0480	Yes	Yes	No	No	No	No	No	Glioblastoma	G4	Dead	13.7
FAHZZU_0819	Yes	Yes	No	No	No	No	No	Glioblastoma	G4	Dead	13.8
FAHZZU_0836	Yes	Yes	No	No	No	No	No	Glioblastoma	G4	Dead	13.8
FAHZZU_1043	Yes	Yes	No	No	No	No	No	Glioblastoma	G4	Dead	13.9
FAHZZU_0054	Yes	Yes	No	No	No	No	No	Glioblastoma	G4	Dead	14
FAHZZU_0187	Yes	Yes	No	No	No	No	No	Glioblastoma	G4	Alive	14
FAHZZU_0239	Yes	Yes	No	No	No	No	No	Glioblastoma	G4	Dead	14
FAHZZU_0244	Yes	Yes	No	No	No	No	No	Glioblastoma	G4	Dead	14
FAHZZU_0382	Yes	Yes	No	No	No	No	No	Glioblastoma	G4	Dead	14
FAHZZU_0629	Yes	Yes	No	No	No	No	No	Glioblastoma	G4	Dead	14
FAHZZU_0808	Yes	Yes	No	No	No	No	No	Glioblastoma	G4	Dead	14.1
FAHZZU_0662	Yes	Yes	No	No	No	No	No	Glioblastoma	G4	Dead	14.2
FAHZZU_0669	Yes	Yes	No	No	No	No	No	Glioblastoma	G4	Dead	14.2
FAHZZU_0781	No	Yes	No	No	No	No	No	Glioblastoma	G4	Dead	14.2
FAHZZU_1025	Yes	Yes	No	No	No	No	No	Glioblastoma	G4	Dead	14.2
FAHZZU_1078	Yes	No	No	No	No	No	No	Glioblastoma	G4	Alive	14.2
FAHZZU_1128	Yes	Yes	Yes	Yes	Yes	No	No	Glioblastoma	G4	Dead	14.2
FAHZZU_0513	No	Yes	No	No	No	No	No	Glioblastoma	G4	Dead	14.23
FAHZZU_0471	Yes	Yes	No	No	No	No	No	Glioblastoma	G4	Dead	14.3
FAHZZU_0689	Yes	Yes	No	No	No	No	No	Glioblastoma	G4	Dead	14.4
FAHZZU_1143	Yes	Yes	Yes	Yes	Yes	No	No	Glioblastoma	G4	Dead	14.4
FAHZZU_0052	No	Yes	No	No	No	No	No	Glioblastoma	G4	Dead	14.5
FAHZZU_0278	Yes	Yes	No	No	No	No	No	Glioblastoma	G4	Dead	14.5
FAHZZU_0325	Yes	Yes	No	No	No	No	No	Glioblastoma	G4	Dead	14.5
FAHZZU_0803	Yes	Yes	No	No	No	No	No	Glioblastoma	G4	Dead	14.5
FAHZZU_0693	Yes	Yes	No	No	No	No	No	Glioblastoma	G4	Dead	14.6
FAHZZU_0788	Yes	Yes	No	No	No	No	No	Glioblastoma	G4	Dead	14.7
FAHZZU_1153	Yes	Yes	Yes	Yes	Yes	No	No	Glioblastoma	G4	Dead	14.72
FAHZZU_0733	Yes	Yes	No	Yes	No	No	No	Glioblastoma	G4	Dead	14.8
FAHZZU_0861	Yes	Yes	No	No	No	No	No	Glioblastoma	G4	Dead	14.8
FAHZZU_0619	Yes	Yes	No	No	No	No	No	Glioblastoma	G4	Dead	14.9
FAHZZU_0016	Yes	Yes	No	No	No	No	No	Glioblastoma	G4	Dead	15
FAHZZU_0140	Yes	Yes	No	No	No	No	No	Glioblastoma	G4	Dead	15
FAHZZU_0208	Yes	Yes	No	No	No	No	No	Glioblastoma	G4	Dead	15
FAHZZU_0276	No	Yes	No	No	No	No	No	Glioblastoma	G4	Dead	15
FAHZZU_0327	Yes	Yes	No	No	No	No	No	Glioblastoma	G4	Dead	15
FAHZZU_0332	Yes	Yes	No	No	No	No	No	Glioblastoma	G4	Dead	15
FAHZZU_0418	Yes	Yes	No	No	No	No	No	Glioblastoma	G4	Alive	15
FAHZZU_0424	Yes	Yes	No	No	No	No	No	Glioblastoma	G4	Dead	15
FAHZZU_0645	Yes	Yes	No	No	No	No	No	Glioblastoma	G4	Dead	15
FAHZZU_0745	Yes	Yes	No	No	No	No	No	Glioblastoma	G4	Alive	15
FAHZZU_0747	Yes	Yes	No	No	No	No	No	Glioblastoma	G4	Alive	15
FAHZZU_0750	Yes	Yes	No	No	No	No	No	Glioblastoma	G4	Alive	15
FAHZZU_0859	Yes	Yes	Yes	Yes	Yes	No	No	Glioblastoma	G4	Dead	15
FAHZZU_1035	Yes	No	No	No	No	No	No	Glioblastoma	G4	Alive	15
FAHZZU_0441	Yes	Yes	No	No	No	No	No	Glioblastoma	G4	Dead	15.1
FAHZZU_0459	Yes	Yes	No	No	No	No	No	Glioblastoma	G4	Dead	15.1
FAHZZU_1119	Yes	Yes	Yes	Yes	Yes	No	No	Glioblastoma	G4	Dead	15.1
FAHZZU_0359	No	Yes	No	No	No	No	No	Glioblastoma	G4	Dead	15.2
FAHZZU_0476	Yes	Yes	No	No	No	No	No	Glioblastoma	G4	Dead	15.2
FAHZZU_0117	Yes	Yes	No	No	No	No	No	Glioblastoma	G4	Dead	15.3
FAHZZU_0556	Yes	Yes	No	No	No	No	No	Glioblastoma	G4	Dead	15.3
FAHZZU_0565	Yes	Yes	No	No	No	No	No	Glioblastoma	G4	Dead	15.3
FAHZZU_0729	Yes	Yes	No	No	No	No	No	Glioblastoma	G4	Dead	15.3
FAHZZU_0383	Yes	Yes	No	No	No	No	No	Glioblastoma	G4	Dead	15.4
FAHZZU_0547	Yes	Yes	No	No	No	No	No	Glioblastoma	G4	Dead	15.4
FAHZZU_1145	No	Yes	Yes	Yes	Yes	No	No	Glioblastoma	G4	Dead	15.4
FAHZZU_0992	Yes	Yes	No	No	No	No	No	Glioblastoma	G4	Dead	15.43
FAHZZU_1183	No	No	No	No	No	Yes	No	Glioblastoma	G4	Dead	15.5
FAHZZU_0270	No	Yes	No	No	No	No	No	Glioblastoma	G4	Dead	15.66
FAHZZU_0177	Yes	Yes	No	No	No	No	No	Glioblastoma	G4	Dead	15.7
FAHZZU_0313	No	Yes	No	No	No	No	No	Glioblastoma	G4	Dead	15.7
FAHZZU_0377	Yes	Yes	No	No	No	No	No	Glioblastoma	G4	Dead	15.7
FAHZZU_0014	No	Yes	No	No	No	No	No	Glioblastoma	G4	Dead	15.73
FAHZZU_0032	No	Yes	No	No	No	No	No	Glioblastoma	G4	Dead	15.8
FAHZZU_1182	No	No	No	No	No	Yes	No	Glioblastoma	G4	Dead	15.8
FAHZZU_0372	Yes	Yes	No	No	No	No	No	Glioblastoma	G4	Dead	15.9
FAHZZU_0779	Yes	Yes	No	No	No	No	No	Glioblastoma	G4	Dead	15.9
FAHZZU_0903	No	Yes	No	No	No	No	No	Glioblastoma	G4	Dead	15.97
FAHZZU_0345	Yes	Yes	No	No	No	No	No	Glioblastoma	G4	Dead	16
FAHZZU_0374	Yes	Yes	No	No	No	No	No	Glioblastoma	G4	Dead	16
FAHZZU_0421	Yes	Yes	No	No	No	No	No	Glioblastoma	G4	Dead	16
FAHZZU_0650	No	Yes	No	No	No	No	No	Glioblastoma	G4	Dead	16
FAHZZU_0719	Yes	Yes	No	No	No	No	No	Glioblastoma	G4	Alive	16
FAHZZU_0809	Yes	Yes	No	No	No	No	No	Glioblastoma	G4	Dead	16
FAHZZU_1136	Yes	Yes	Yes	Yes	Yes	No	No	Glioblastoma	G4	Dead	16
FAHZZU_1155	Yes	Yes	Yes	Yes	Yes	No	No	Glioblastoma	G4	Dead	16
FAHZZU_0818	Yes	Yes	No	No	No	No	No	Glioblastoma	G4	Dead	16.1
FAHZZU_0980	Yes	No	No	No	No	No	No	Glioblastoma	G4	Alive	16.18
FAHZZU_0559	Yes	Yes	No	No	No	No	No	Glioblastoma	G4	Dead	16.2
FAHZZU_0022	No	Yes	No	No	No	No	No	Glioblastoma	G4	Dead	16.3
FAHZZU_0136	No	Yes	No	No	No	No	No	Glioblastoma	G4	Dead	16.3
FAHZZU_0466	No	Yes	No	No	No	No	No	Glioblastoma	G4	Dead	16.3
FAHZZU_0030	Yes	Yes	No	No	No	No	No	Glioblastoma	G4	Dead	16.4
FAHZZU_1151	Yes	Yes	Yes	Yes	Yes	No	No	Glioblastoma	G4	Dead	16.4
FAHZZU_0031	No	Yes	No	No	No	No	No	Glioblastoma	G4	Dead	16.5
FAHZZU_0990	Yes	No	No	No	No	No	No	Glioblastoma	G4	Alive	16.5
FAHZZU_1065	Yes	No	No	No	No	No	No	Glioblastoma	G4	Alive	16.5
FAHZZU_0026	No	Yes	No	No	No	No	No	Glioblastoma	G4	Dead	16.6
FAHZZU_0575	No	Yes	No	No	No	No	No	Glioblastoma	G4	Dead	16.67
FAHZZU_0079	Yes	Yes	No	No	No	No	No	Glioblastoma	G4	Dead	16.7
FAHZZU_1106	Yes	Yes	No	No	No	No	No	Glioblastoma	G4	Dead	16.7
FAHZZU_0717	Yes	Yes	No	No	No	No	No	Glioblastoma	G4	Dead	16.8
FAHZZU_0994	Yes	Yes	No	No	No	No	No	Glioblastoma	G4	Dead	16.8
FAHZZU_1045	Yes	Yes	No	No	No	No	No	Glioblastoma	G4	Dead	16.8
FAHZZU_0356	Yes	Yes	No	No	No	No	No	Glioblastoma	G4	Dead	16.9
FAHZZU_0025	Yes	Yes	No	No	No	No	No	Glioblastoma	G4	Dead	17
FAHZZU_0103	Yes	Yes	No	No	No	No	No	Glioblastoma	G4	Dead	17
FAHZZU_0240	Yes	Yes	No	No	No	No	No	Glioblastoma	G4	Dead	17
FAHZZU_0715	Yes	Yes	No	No	No	No	No	Glioblastoma	G4	Alive	17
FAHZZU_0732	Yes	Yes	No	No	No	No	No	Glioblastoma	G4	Dead	17
FAHZZU_0741	No	Yes	No	No	No	No	No	Glioblastoma	G4	Dead	17
FAHZZU_1079	Yes	Yes	No	No	No	No	No	Glioblastoma	G4	Dead	17
FAHZZU_1089	Yes	Yes	No	No	No	No	No	Glioblastoma	G4	Dead	17
FAHZZU_0473	Yes	Yes	No	No	No	No	No	Glioblastoma	G4	Dead	17.1
FAHZZU_0533	Yes	Yes	No	No	No	No	No	Glioblastoma	G4	Dead	17.1
FAHZZU_1176	No	No	No	No	No	Yes	Yes	Glioblastoma	G4	Dead	17.1
FAHZZU_1161	Yes	Yes	Yes	Yes	Yes	No	No	Glioblastoma	G4	Alive	17.13
FAHZZU_0375	Yes	Yes	No	No	No	No	No	Glioblastoma	G4	Dead	17.2
FAHZZU_0885	Yes	Yes	Yes	Yes	Yes	No	No	Glioblastoma	G4	Dead	17.2
FAHZZU_0945	Yes	Yes	Yes	Yes	Yes	No	No	Glioblastoma	G4	Dead	17.2
FAHZZU_1187	No	No	No	No	No	Yes	No	Glioblastoma	G4	Alive	17.2
FAHZZU_0428	Yes	Yes	No	No	No	No	No	Glioblastoma	G4	Dead	17.3
FAHZZU_0635	Yes	Yes	No	No	No	No	No	Glioblastoma	G4	Dead	17.3
FAHZZU_1113	Yes	Yes	No	No	No	No	No	Glioblastoma	G4	Dead	17.37
FAHZZU_0535	Yes	Yes	No	No	No	No	No	Glioblastoma	G4	Dead	17.4
FAHZZU_0653	No	Yes	No	No	No	No	No	Glioblastoma	G4	Dead	17.47
FAHZZU_1159	Yes	Yes	Yes	Yes	Yes	No	No	Glioblastoma	G4	Alive	17.47
FAHZZU_0720	No	Yes	No	No	No	No	No	Glioblastoma	G4	Dead	17.5
FAHZZU_0901	Yes	Yes	Yes	Yes	Yes	No	No	Glioblastoma	G4	Dead	17.5
FAHZZU_1160	Yes	Yes	Yes	Yes	Yes	No	No	Glioblastoma	G4	Alive	17.5
FAHZZU_1186	No	No	No	No	No	Yes	No	Glioblastoma	G4	Alive	17.5
FAHZZU_1123	Yes	Yes	Yes	Yes	Yes	No	No	Glioblastoma	G4	Dead	17.53
FAHZZU_0091	No	Yes	No	No	No	No	No	Glioblastoma	G4	Dead	17.6
FAHZZU_1095	Yes	Yes	No	No	No	No	No	Glioblastoma	G4	Dead	17.7
FAHZZU_0085	Yes	Yes	No	No	No	No	No	Glioblastoma	G4	Dead	17.8
FAHZZU_0712	Yes	Yes	No	No	No	No	No	Glioblastoma	G4	Alive	17.8
FAHZZU_0169	Yes	Yes	No	No	No	No	No	Glioblastoma	G4	Dead	17.9
FAHZZU_0447	Yes	Yes	No	No	No	No	No	Glioblastoma	G4	Dead	17.9
FAHZZU_0583	Yes	Yes	No	No	No	No	No	Glioblastoma	G4	Dead	17.9
FAHZZU_0287	Yes	Yes	No	No	No	No	No	Glioblastoma	G4	Dead	18
FAHZZU_0311	Yes	Yes	No	No	No	No	No	Glioblastoma	G4	Dead	18
FAHZZU_0365	Yes	Yes	No	No	No	No	No	Glioblastoma	G4	Dead	18
FAHZZU_0490	Yes	Yes	No	No	No	No	No	Glioblastoma	G4	Dead	18
FAHZZU_0497	Yes	Yes	No	No	No	No	No	Glioblastoma	G4	Dead	18
FAHZZU_0636	Yes	Yes	No	No	No	No	No	Glioblastoma	G4	Dead	18
FAHZZU_0686	No	Yes	No	No	No	No	No	Glioblastoma	G4	Dead	18
FAHZZU_0753	Yes	Yes	Yes	Yes	Yes	No	No	Glioblastoma	G4	Dead	18
FAHZZU_0897	Yes	Yes	No	No	No	No	No	Glioblastoma	G4	Dead	18
FAHZZU_0925	Yes	Yes	Yes	Yes	Yes	No	No	Glioblastoma	G4	Dead	18
FAHZZU_0982	Yes	Yes	Yes	Yes	Yes	No	No	Glioblastoma	G4	Dead	18
FAHZZU_0598	Yes	Yes	No	No	No	No	No	Glioblastoma	G4	Dead	18.1
FAHZZU_1085	Yes	Yes	No	No	No	No	No	Glioblastoma	G4	Dead	18.17
FAHZZU_0786	Yes	Yes	Yes	Yes	Yes	No	No	Glioblastoma	G4	Dead	18.2
FAHZZU_0807	Yes	Yes	No	No	No	No	No	Glioblastoma	G4	Alive	18.2
FAHZZU_0489	Yes	Yes	No	No	No	No	No	Glioblastoma	G4	Dead	18.3
FAHZZU_0708	Yes	Yes	No	No	No	No	No	Glioblastoma	G4	Dead	18.3
FAHZZU_1061	Yes	Yes	No	No	No	No	No	Glioblastoma	G4	Dead	18.3
FAHZZU_0024	No	Yes	No	No	No	No	No	Glioblastoma	G4	Dead	18.5
FAHZZU_0399	No	Yes	No	No	No	No	No	Glioblastoma	G4	Dead	18.5
FAHZZU_0509	Yes	Yes	No	No	No	No	No	Glioblastoma	G4	Dead	18.5
FAHZZU_0723	Yes	Yes	No	No	No	No	No	Glioblastoma	G4	Dead	18.5
FAHZZU_0889	Yes	Yes	Yes	Yes	Yes	No	No	Glioblastoma	G4	Dead	18.5
FAHZZU_0105	No	Yes	No	No	No	No	No	Glioblastoma	G4	Dead	18.6
FAHZZU_0448	Yes	Yes	No	No	No	No	No	Glioblastoma	G4	Dead	18.6
FAHZZU_0983	Yes	Yes	No	No	No	No	No	Glioblastoma	G4	Dead	18.6
FAHZZU_0227	Yes	Yes	No	No	No	No	No	Glioblastoma	G4	Dead	18.7
FAHZZU_0229	Yes	Yes	No	No	No	No	No	Glioblastoma	G4	Dead	18.7
FAHZZU_0486	Yes	Yes	No	No	No	No	No	Glioblastoma	G4	Dead	18.7
FAHZZU_0614	No	Yes	No	No	No	No	No	Glioblastoma	G4	Dead	18.7
FAHZZU_1062	Yes	Yes	No	No	No	No	No	Glioblastoma	G4	Dead	18.7
FAHZZU_1064	Yes	Yes	No	No	No	No	No	Glioblastoma	G4	Dead	18.7
FAHZZU_1177	No	No	No	No	No	Yes	No	Glioblastoma	G4	Alive	18.8
FAHZZU_1179	No	No	No	No	No	Yes	Yes	Glioblastoma	G4	Alive	18.8
FAHZZU_0099	Yes	Yes	No	No	No	No	No	Glioblastoma	G4	Dead	18.9
FAHZZU_1166	No	No	No	No	No	Yes	No	Glioblastoma	G4	Dead	18.9
FAHZZU_0101	No	Yes	No	No	No	No	No	Glioblastoma	G4	Dead	19
FAHZZU_0180	Yes	Yes	No	No	No	No	No	Glioblastoma	G4	Dead	19
FAHZZU_0230	Yes	Yes	No	No	No	No	No	Glioblastoma	G4	Dead	19
FAHZZU_0589	Yes	Yes	No	No	No	No	No	Glioblastoma	G4	Dead	19
FAHZZU_0621	Yes	Yes	No	No	No	No	No	Glioblastoma	G4	Dead	19
FAHZZU_0675	Yes	Yes	No	No	No	No	No	Glioblastoma	G4	Alive	19
FAHZZU_0770	No	Yes	Yes	Yes	Yes	No	No	Glioblastoma	G4	Dead	19
FAHZZU_0876	Yes	Yes	Yes	Yes	Yes	No	No	Glioblastoma	G4	Dead	19
FAHZZU_1003	Yes	Yes	No	No	No	No	No	Glioblastoma	G4	Dead	19
FAHZZU_1112	Yes	Yes	No	No	No	No	No	Glioblastoma	G4	Dead	19
FAHZZU_1175	No	No	No	No	No	Yes	Yes	Glioblastoma	G4	Alive	19
FAHZZU_1174	No	No	No	No	No	Yes	No	Glioblastoma	G4	Alive	19.1
FAHZZU_1054	No	Yes	No	No	No	No	No	Glioblastoma	G4	Dead	19.2
FAHZZU_0595	Yes	Yes	No	No	No	No	No	Glioblastoma	G4	Dead	19.3
FAHZZU_1144	Yes	Yes	Yes	Yes	Yes	No	No	Glioblastoma	G4	Dead	19.3
FAHZZU_1173	No	No	No	No	No	Yes	No	Glioblastoma	G4	Alive	19.3
FAHZZU_0212	Yes	Yes	No	No	No	No	No	Glioblastoma	G4	Dead	19.4
FAHZZU_0218	Yes	Yes	No	No	No	No	No	Glioblastoma	G4	Dead	19.4
FAHZZU_0387	Yes	Yes	No	No	No	No	No	Glioblastoma	G4	Dead	19.4
FAHZZU_0674	No	Yes	No	No	No	No	No	Glioblastoma	G4	Dead	19.4
FAHZZU_0927	Yes	Yes	Yes	Yes	Yes	No	No	Glioblastoma	G4	Dead	19.4
FAHZZU_1172	No	No	No	No	No	Yes	No	Glioblastoma	G4	Alive	19.4
FAHZZU_0388	Yes	Yes	No	No	No	No	No	Glioblastoma	G4	Dead	19.5
FAHZZU_1020	Yes	Yes	No	No	No	No	No	Glioblastoma	G4	Dead	19.5
FAHZZU_1137	Yes	Yes	Yes	Yes	Yes	No	No	Glioblastoma	G4	Dead	19.5333
FAHZZU_0606	No	Yes	No	No	No	No	No	Glioblastoma	G4	Dead	19.57
FAHZZU_0630	Yes	Yes	No	No	No	No	No	Glioblastoma	G4	Dead	19.6
FAHZZU_0351	No	Yes	No	No	No	No	No	Glioblastoma	G4	Dead	19.67
FAHZZU_0056	Yes	Yes	No	No	No	No	No	Glioblastoma	G4	Dead	19.7
FAHZZU_0296	Yes	Yes	No	No	No	No	No	Glioblastoma	G4	Dead	19.8
FAHZZU_0641	Yes	Yes	No	No	No	No	No	Glioblastoma	G4	Dead	19.8
FAHZZU_1157	Yes	Yes	Yes	Yes	Yes	No	No	Glioblastoma	G4	Alive	19.8
FAHZZU_0153	Yes	Yes	Yes	Yes	Yes	No	No	Glioblastoma	G4	Dead	19.9
FAHZZU_0816	Yes	Yes	Yes	Yes	Yes	No	No	Glioblastoma	G4	Dead	19.9
FAHZZU_0125	Yes	Yes	No	No	No	No	No	Glioblastoma	G4	Dead	20
FAHZZU_0262	Yes	Yes	No	No	No	No	No	Glioblastoma	G4	Dead	20
FAHZZU_0293	Yes	Yes	No	No	No	No	No	Glioblastoma	G4	Dead	20
FAHZZU_0470	Yes	Yes	No	No	No	No	No	Glioblastoma	G4	Dead	20
FAHZZU_0543	Yes	Yes	No	No	No	No	No	Glioblastoma	G4	Dead	20
FAHZZU_0608	Yes	Yes	No	No	No	No	No	Glioblastoma	G4	Dead	20
FAHZZU_0780	Yes	Yes	No	No	No	No	No	Glioblastoma	G4	Dead	20
FAHZZU_0298	Yes	Yes	No	No	No	No	No	Glioblastoma	G4	Dead	20.17
FAHZZU_0680	Yes	Yes	No	No	No	No	No	Glioblastoma	G4	Dead	20.2
FAHZZU_0211	Yes	Yes	No	No	No	No	No	Glioblastoma	G4	Dead	20.3
FAHZZU_0566	Yes	Yes	No	No	No	No	No	Glioblastoma	G4	Dead	20.3
FAHZZU_1169	No	No	No	No	No	Yes	No	Glioblastoma	G4	Alive	20.4
FAHZZU_1170	No	No	No	No	No	Yes	Yes	Glioblastoma	G4	Alive	20.4
FAHZZU_1082	Yes	No	No	No	No	No	No	Glioblastoma	G4	Alive	20.5
FAHZZU_0751	Yes	Yes	No	No	No	No	No	Glioblastoma	G4	Dead	20.6
FAHZZU_1163	No	No	No	No	No	Yes	No	Glioblastoma	G4	Alive	20.7
FAHZZU_0767	No	Yes	No	No	No	No	No	Glioblastoma	G4	Dead	20.8
FAHZZU_1167	No	No	No	No	No	Yes	Yes	Glioblastoma	G4	Alive	20.8
FAHZZU_1168	No	No	No	No	No	Yes	No	Glioblastoma	G4	Alive	20.8
FAHZZU_0483	Yes	Yes	No	No	No	No	No	Glioblastoma	G4	Dead	20.9
FAHZZU_0746	Yes	Yes	No	No	No	No	No	Glioblastoma	G4	Dead	20.9
FAHZZU_0765	Yes	Yes	Yes	Yes	Yes	No	No	Glioblastoma	G4	Dead	20.9
FAHZZU_1080	Yes	Yes	No	No	No	No	No	Glioblastoma	G4	Dead	20.97
FAHZZU_0213	Yes	Yes	No	No	No	No	No	Glioblastoma	G4	Dead	21
FAHZZU_0263	No	Yes	No	No	No	No	No	Glioblastoma	G4	Dead	21
FAHZZU_0355	Yes	Yes	No	No	No	No	No	Glioblastoma	G4	Dead	21
FAHZZU_0909	Yes	No	No	No	No	No	No	Glioblastoma	G4	Alive	21
FAHZZU_1165	No	No	No	No	No	Yes	No	Glioblastoma	G4	Alive	21
FAHZZU_0271	Yes	Yes	No	No	No	No	No	Glioblastoma	G4	Dead	21.1
FAHZZU_0329	Yes	Yes	No	No	No	No	No	Glioblastoma	G4	Dead	21.1
FAHZZU_0469	Yes	Yes	No	No	No	No	No	Glioblastoma	G4	Dead	21.1
FAHZZU_1074	Yes	Yes	No	No	No	No	No	Glioblastoma	G4	Dead	21.1
FAHZZU_0551	Yes	Yes	No	No	No	No	No	Glioblastoma	G4	Dead	21.3
FAHZZU_1015	Yes	Yes	Yes	Yes	Yes	No	No	Glioblastoma	G4	Dead	21.3
FAHZZU_0524	Yes	Yes	No	No	No	No	No	Glioblastoma	G4	Dead	21.5
FAHZZU_0059	Yes	Yes	No	No	No	No	No	Glioblastoma	G4	Dead	21.6
FAHZZU_0398	Yes	Yes	No	No	No	No	No	Glioblastoma	G4	Dead	21.6
FAHZZU_0995	Yes	Yes	Yes	Yes	Yes	No	No	Glioblastoma	G4	Dead	21.7
FAHZZU_1130	No	Yes	Yes	Yes	Yes	No	No	Glioblastoma	G4	Dead	21.7
FAHZZU_1122	Yes	Yes	Yes	Yes	Yes	No	No	Glioblastoma	G4	Dead	21.77
FAHZZU_0863	Yes	Yes	Yes	Yes	Yes	No	No	Glioblastoma	G4	Dead	21.8
FAHZZU_0985	Yes	Yes	Yes	Yes	Yes	No	No	Glioblastoma	G4	Dead	21.8
FAHZZU_1154	No	Yes	Yes	Yes	Yes	No	No	Glioblastoma	G4	Dead	21.93
FAHZZU_0130	No	Yes	No	No	No	No	No	Glioblastoma	G4	Dead	22
FAHZZU_0260	Yes	Yes	No	No	No	No	No	Glioblastoma	G4	Dead	22
FAHZZU_0320	No	Yes	No	No	No	No	No	Glioblastoma	G4	Dead	22
FAHZZU_0413	Yes	Yes	No	No	No	No	No	Glioblastoma	G4	Dead	22
FAHZZU_0643	No	Yes	No	No	No	No	No	Glioblastoma	G4	Dead	22
FAHZZU_0676	Yes	Yes	No	No	No	No	No	Glioblastoma	G4	Dead	22
FAHZZU_1048	Yes	Yes	No	No	No	No	No	Glioblastoma	G4	Dead	22
FAHZZU_1118	Yes	Yes	Yes	Yes	Yes	No	No	Glioblastoma	G4	Dead	22.1
FAHZZU_1041	Yes	Yes	No	No	No	No	No	Glioblastoma	G4	Dead	22.2
FAHZZU_1042	Yes	Yes	No	No	No	No	No	Glioblastoma	G4	Dead	22.3
FAHZZU_0839	No	Yes	No	No	No	No	No	Glioblastoma	G4	Dead	22.37
FAHZZU_1126	No	Yes	Yes	Yes	Yes	No	No	Glioblastoma	G4	Dead	22.37
FAHZZU_0525	Yes	Yes	No	No	No	No	No	Glioblastoma	G4	Dead	22.4
FAHZZU_0738	Yes	Yes	No	No	No	No	No	Glioblastoma	G4	Dead	22.4
FAHZZU_1115	No	Yes	Yes	Yes	Yes	No	No	Glioblastoma	G4	Dead	22.4333
FAHZZU_0176	No	Yes	No	No	No	No	No	Glioblastoma	G4	Dead	22.5
FAHZZU_1028	Yes	Yes	No	No	No	No	No	Glioblastoma	G4	Dead	22.5
FAHZZU_1030	Yes	Yes	No	No	No	No	No	Glioblastoma	G4	Dead	22.5
FAHZZU_1094	Yes	Yes	No	No	No	No	No	Glioblastoma	G4	Dead	22.5
FAHZZU_1040	Yes	Yes	No	No	No	No	No	Glioblastoma	G4	Dead	22.58
FAHZZU_0100	Yes	Yes	No	No	No	No	No	Glioblastoma	G4	Dead	22.6
FAHZZU_0672	Yes	Yes	No	No	No	No	No	Glioblastoma	G4	Dead	22.6
FAHZZU_1023	Yes	Yes	No	No	No	No	No	Glioblastoma	G4	Dead	22.6
FAHZZU_1131	Yes	Yes	Yes	Yes	Yes	No	No	Glioblastoma	G4	Dead	22.6
FAHZZU_1021	Yes	Yes	No	Yes	No	No	No	Glioblastoma	G4	Dead	22.65
FAHZZU_0996	Yes	Yes	Yes	Yes	Yes	No	No	Glioblastoma	G4	Dead	22.67
FAHZZU_0700	Yes	Yes	No	No	No	No	No	Glioblastoma	G4	Dead	22.7
FAHZZU_1121	Yes	Yes	Yes	Yes	Yes	No	No	Glioblastoma	G4	Dead	22.73
FAHZZU_1138	Yes	Yes	Yes	Yes	Yes	No	No	Glioblastoma	G4	Dead	22.8
FAHZZU_1047	Yes	Yes	No	No	No	No	No	Glioblastoma	G4	Dead	22.85
FAHZZU_0550	Yes	Yes	No	No	No	No	No	Glioblastoma	G4	Dead	22.9
FAHZZU_0081	Yes	Yes	No	No	No	No	No	Glioblastoma	G4	Dead	23
FAHZZU_0249	Yes	Yes	No	No	No	No	No	Glioblastoma	G4	Dead	23
FAHZZU_0255	Yes	Yes	No	No	No	No	No	Glioblastoma	G4	Dead	23
FAHZZU_0612	Yes	Yes	No	No	No	No	No	Glioblastoma	G4	Alive	23
FAHZZU_1063	Yes	Yes	No	No	No	No	No	Glioblastoma	G4	Dead	23
FAHZZU_0205	Yes	Yes	No	No	No	No	No	Glioblastoma	G4	Dead	23.1
FAHZZU_0098	Yes	Yes	No	No	No	No	No	Glioblastoma	G4	Dead	23.2
FAHZZU_1146	Yes	Yes	Yes	Yes	Yes	No	No	Glioblastoma	G4	Dead	23.21
FAHZZU_0319	No	Yes	No	No	No	No	No	Glioblastoma	G4	Dead	23.27
FAHZZU_1147	Yes	Yes	Yes	Yes	Yes	No	No	Glioblastoma	G4	Dead	23.3
FAHZZU_0097	Yes	Yes	No	No	No	No	No	Glioblastoma	G4	Dead	23.4
FAHZZU_0312	Yes	Yes	No	No	No	No	No	Glioblastoma	G4	Dead	23.4
FAHZZU_0988	Yes	Yes	No	No	No	No	No	Glioblastoma	G4	Dead	23.41
FAHZZU_0607	Yes	Yes	No	No	No	No	No	Glioblastoma	G4	Alive	23.5
FAHZZU_0620	Yes	Yes	No	No	No	No	No	Glioblastoma	G4	Alive	23.5
FAHZZU_1060	Yes	No	No	No	No	No	No	Glioblastoma	G4	Alive	23.5
FAHZZU_1102	Yes	No	No	No	No	No	No	Glioblastoma	G4	Alive	23.5
FAHZZU_1148	Yes	Yes	Yes	Yes	Yes	No	No	Glioblastoma	G4	Dead	23.5
FAHZZU_0080	Yes	Yes	No	No	No	No	No	Glioblastoma	G4	Dead	23.7
FAHZZU_0724	Yes	Yes	No	No	No	No	No	Glioblastoma	G4	Dead	23.7
FAHZZU_0061	No	Yes	No	No	No	No	No	Glioblastoma	G4	Dead	23.8
FAHZZU_0730	Yes	Yes	No	No	No	No	No	Glioblastoma	G4	Dead	23.8
FAHZZU_0663	No	Yes	No	No	No	No	No	Glioblastoma	G4	Dead	23.87
FAHZZU_0810	Yes	Yes	No	No	No	No	No	Glioblastoma	G4	Dead	23.9
FAHZZU_0465	No	Yes	No	No	No	No	No	Glioblastoma	G4	Dead	23.97
FAHZZU_1052	No	Yes	No	No	No	No	No	Glioblastoma	G4	Dead	23.97
FAHZZU_0060	No	Yes	No	No	No	No	No	Glioblastoma	G4	Dead	24
FAHZZU_0083	Yes	Yes	No	No	No	No	No	Glioblastoma	G4	Dead	24
FAHZZU_0096	No	Yes	No	No	No	No	No	Glioblastoma	G4	Dead	24
FAHZZU_0112	Yes	Yes	No	No	No	No	No	Glioblastoma	G4	Dead	24
FAHZZU_0280	Yes	Yes	No	No	No	No	No	Glioblastoma	G4	Dead	24
FAHZZU_0284	Yes	Yes	No	No	No	No	No	Glioblastoma	G4	Dead	24
FAHZZU_0288	Yes	Yes	No	No	No	No	No	Glioblastoma	G4	Dead	24
FAHZZU_0334	Yes	Yes	No	No	No	No	No	Glioblastoma	G4	Dead	24
FAHZZU_0416	Yes	No	No	No	No	No	No	Glioblastoma	G4	Dead	24
FAHZZU_0426	Yes	Yes	No	No	No	No	No	Glioblastoma	G4	Dead	24
FAHZZU_0864	Yes	Yes	Yes	Yes	Yes	No	No	Glioblastoma	G4	Dead	24
FAHZZU_1101	Yes	No	No	No	No	No	No	Glioblastoma	G4	Alive	24
FAHZZU_0991	Yes	Yes	No	No	No	No	No	Glioblastoma	G4	Dead	24.01
FAHZZU_0492	Yes	Yes	No	No	No	No	No	Glioblastoma	G4	Dead	24.1
FAHZZU_0673	Yes	Yes	No	No	No	No	No	Glioblastoma	G4	Dead	24.17
FAHZZU_1058	No	Yes	No	No	No	No	No	Glioblastoma	G4	Dead	24.17
FAHZZU_0092	No	Yes	No	No	No	No	No	Glioblastoma	G4	Dead	24.3
FAHZZU_0266	Yes	Yes	No	No	No	No	No	Glioblastoma	G4	Dead	24.4
FAHZZU_0911	Yes	Yes	No	No	No	No	No	Glioblastoma	G4	Dead	24.4
FAHZZU_0090	Yes	Yes	No	No	No	No	No	Glioblastoma	G4	Dead	24.5
FAHZZU_1055	Yes	Yes	No	No	No	No	No	Glioblastoma	G4	Dead	24.57
FAHZZU_0554	Yes	Yes	No	No	No	No	No	Glioblastoma	G4	Dead	24.6
FAHZZU_0655	No	Yes	No	No	No	No	No	Glioblastoma	G4	Dead	24.6
FAHZZU_0775	Yes	Yes	No	No	No	No	No	Glioblastoma	G4	Dead	24.6
FAHZZU_1103	Yes	Yes	No	No	No	No	No	Glioblastoma	G4	Dead	24.6
FAHZZU_0627	Yes	Yes	No	No	No	No	No	Glioblastoma	G4	Dead	24.7
FAHZZU_0039	No	Yes	No	No	No	No	No	Glioblastoma	G4	Dead	24.8
FAHZZU_0915	Yes	Yes	No	No	No	No	No	Glioblastoma	G4	Dead	24.9
FAHZZU_0214	Yes	Yes	No	No	No	No	No	Glioblastoma	G4	Dead	25
FAHZZU_0281	Yes	Yes	No	No	No	No	No	Glioblastoma	G4	Dead	25
FAHZZU_0315	Yes	Yes	No	No	No	No	No	Glioblastoma	G4	Dead	25
FAHZZU_0393	Yes	Yes	No	No	No	No	No	Glioblastoma	G4	Dead	25
FAHZZU_0493	Yes	Yes	No	No	No	No	No	Glioblastoma	G4	Dead	25
FAHZZU_0500	Yes	Yes	No	No	No	No	No	Glioblastoma	G4	Dead	25.1
FAHZZU_0464	Yes	Yes	No	No	No	No	No	Glioblastoma	G4	Dead	25.3
FAHZZU_0797	Yes	No	No	No	No	No	No	Glioblastoma	G4	Alive	25.3
FAHZZU_0046	No	Yes	No	No	No	No	No	Glioblastoma	G4	Dead	25.4
FAHZZU_1125	No	Yes	Yes	Yes	Yes	No	No	Glioblastoma	G4	Dead	25.43
FAHZZU_0088	Yes	Yes	No	No	No	No	No	Glioblastoma	G4	Dead	25.5
FAHZZU_1070	Yes	No	No	No	No	No	No	Glioblastoma	G4	Alive	25.5
FAHZZU_0594	Yes	No	No	No	No	No	No	Glioblastoma	G4	Dead	25.6
FAHZZU_0822	Yes	Yes	No	No	No	No	No	Glioblastoma	G4	Dead	25.6
FAHZZU_0386	Yes	Yes	No	No	No	No	No	Glioblastoma	G4	Dead	25.7
FAHZZU_0396	Yes	Yes	No	No	No	No	No	Glioblastoma	G4	Dead	25.8
FAHZZU_0219	Yes	Yes	No	No	No	No	No	Glioblastoma	G4	Dead	25.9
FAHZZU_0778	Yes	Yes	No	No	No	No	No	Glioblastoma	G4	Dead	25.9
FAHZZU_0391	Yes	Yes	No	No	No	No	No	Glioblastoma	G4	Dead	26
FAHZZU_0409	Yes	Yes	No	No	No	No	No	Glioblastoma	G4	Dead	26
FAHZZU_0574	No	Yes	No	No	No	No	No	Glioblastoma	G4	Alive	26
FAHZZU_0618	Yes	Yes	No	No	No	No	No	Glioblastoma	G4	Dead	26
FAHZZU_1008	Yes	Yes	No	No	No	No	No	Glioblastoma	G4	Dead	26
FAHZZU_1150	No	Yes	Yes	Yes	Yes	No	No	Glioblastoma	G4	Dead	26
FAHZZU_0642	Yes	Yes	No	No	No	No	No	Glioblastoma	G4	Dead	26.1
FAHZZU_0367	Yes	Yes	No	No	No	No	No	Glioblastoma	G4	Dead	26.2
FAHZZU_0087	Yes	Yes	No	No	No	No	No	Glioblastoma	G4	Dead	26.5
FAHZZU_0291	Yes	Yes	No	No	No	No	No	Glioblastoma	G4	Dead	26.5
FAHZZU_0661	Yes	Yes	No	No	No	No	No	Glioblastoma	G4	Dead	26.5
FAHZZU_0564	No	Yes	No	No	No	No	No	Glioblastoma	G4	Dead	26.6
FAHZZU_0895	Yes	Yes	No	No	No	No	No	Glioblastoma	G4	Dead	26.6
FAHZZU_0379	Yes	Yes	No	No	No	No	No	Glioblastoma	G4	Dead	26.7
FAHZZU_0592	No	Yes	No	No	No	No	No	Glioblastoma	G4	Dead	26.7
FAHZZU_0477	No	Yes	No	No	No	No	No	Glioblastoma	G4	Dead	27
FAHZZU_0498	Yes	Yes	No	No	No	No	No	Glioblastoma	G4	Dead	27
FAHZZU_0549	Yes	Yes	No	No	No	No	No	Glioblastoma	G4	Alive	27
FAHZZU_0989	Yes	Yes	Yes	Yes	Yes	No	No	Glioblastoma	G4	Dead	27.1
FAHZZU_0065	Yes	Yes	No	No	No	No	No	Glioblastoma	G4	Dead	27.2
FAHZZU_0040	Yes	No	No	No	No	No	No	Glioblastoma	G4	Dead	27.3
FAHZZU_0478	No	Yes	No	No	No	No	No	Glioblastoma	G4	Dead	27.3
FAHZZU_1152	Yes	Yes	Yes	Yes	Yes	No	No	Glioblastoma	G4	Alive	27.3
FAHZZU_0414	Yes	Yes	Yes	Yes	Yes	No	No	Glioblastoma	G4	Dead	27.6
FAHZZU_0077	No	Yes	No	No	No	No	No	Glioblastoma	G4	Dead	27.7
FAHZZU_0038	No	Yes	No	No	No	No	No	Glioblastoma	G4	Dead	27.8
FAHZZU_0323	Yes	Yes	No	No	No	No	No	Glioblastoma	G4	Dead	27.8
FAHZZU_0020	Yes	Yes	No	No	No	No	No	Glioblastoma	G4	Dead	28
FAHZZU_0537	Yes	Yes	No	No	No	No	No	Glioblastoma	G4	Dead	28
FAHZZU_0541	Yes	Yes	No	No	No	No	No	Glioblastoma	G4	Alive	28
FAHZZU_0671	No	Yes	No	No	No	No	No	Glioblastoma	G4	Dead	28
FAHZZU_0300	Yes	Yes	No	No	No	No	No	Glioblastoma	G4	Dead	28.17
FAHZZU_0002	No	Yes	No	No	No	No	No	Glioblastoma	G4	Dead	28.2
FAHZZU_0571	Yes	Yes	Yes	Yes	Yes	No	No	Glioblastoma	G4	Dead	28.2
FAHZZU_0853	Yes	Yes	No	No	No	No	No	Glioblastoma	G4	Dead	28.2
FAHZZU_0957	Yes	Yes	Yes	Yes	Yes	No	No	Glioblastoma	G4	Dead	28.2
FAHZZU_0698	No	Yes	No	No	No	No	No	Glioblastoma	G4	Dead	28.21
FAHZZU_0151	Yes	Yes	No	No	No	No	No	Glioblastoma	G4	Dead	28.4
FAHZZU_0004	No	Yes	No	No	No	No	No	Glioblastoma	G4	Dead	28.5
FAHZZU_0137	Yes	Yes	No	No	No	No	No	Glioblastoma	G4	Dead	28.5
FAHZZU_0677	Yes	Yes	No	No	No	No	No	Glioblastoma	G4	Dead	28.5
FAHZZU_0504	No	Yes	No	No	No	No	No	Glioblastoma	G4	Dead	28.52
FAHZZU_0003	No	Yes	No	No	No	No	No	Glioblastoma	G4	Dead	28.6
FAHZZU_0633	Yes	Yes	No	No	No	No	No	Glioblastoma	G4	Dead	28.6
FAHZZU_0190	Yes	Yes	No	No	No	No	No	Glioblastoma	G4	Dead	28.8
FAHZZU_0192	Yes	Yes	No	No	No	No	No	Glioblastoma	G4	Dead	29.3
FAHZZU_0949	Yes	Yes	Yes	Yes	Yes	No	No	Glioblastoma	G4	Dead	29.35
FAHZZU_0446	Yes	Yes	No	No	No	No	No	Glioblastoma	G4	Dead	29.5
FAHZZU_0534	Yes	Yes	No	No	No	No	No	Glioblastoma	G4	Dead	29.5
FAHZZU_1039	Yes	Yes	No	No	No	No	No	Glioblastoma	G4	Dead	29.6
FAHZZU_1140	No	Yes	Yes	Yes	Yes	No	No	Glioblastoma	G4	Dead	29.6
FAHZZU_0938	Yes	Yes	No	No	No	No	No	Glioblastoma	G4	Dead	29.7
FAHZZU_0714	Yes	Yes	No	No	No	No	No	Glioblastoma	G4	Dead	29.8
FAHZZU_0659	Yes	Yes	No	No	No	No	No	Glioblastoma	G4	Dead	29.9
FAHZZU_0331	Yes	Yes	No	No	No	No	No	Glioblastoma	G4	Dead	30
FAHZZU_0436	Yes	Yes	No	No	No	No	No	Glioblastoma	G4	Dead	30
FAHZZU_0591	No	Yes	No	No	No	No	No	Glioblastoma	G4	Dead	30
FAHZZU_0848	Yes	Yes	No	No	No	No	No	Glioblastoma	G4	Dead	30
FAHZZU_1096	Yes	Yes	No	No	No	No	No	Glioblastoma	G4	Alive	30
FAHZZU_0496	Yes	Yes	No	No	No	No	No	Glioblastoma	G4	Dead	30.1
FAHZZU_0442	No	Yes	No	No	No	No	No	Glioblastoma	G4	Dead	30.3
FAHZZU_0932	Yes	Yes	No	No	No	No	No	Glioblastoma	G4	Dead	30.3
FAHZZU_0395	Yes	Yes	No	No	No	No	No	Glioblastoma	G4	Dead	30.4
FAHZZU_0846	Yes	Yes	Yes	Yes	Yes	No	No	Glioblastoma	G4	Dead	30.55
FAHZZU_0587	Yes	Yes	No	No	No	No	No	Glioblastoma	G4	Dead	30.6
FAHZZU_0601	Yes	Yes	No	No	No	No	No	Glioblastoma	G4	Dead	30.6
FAHZZU_0811	Yes	Yes	Yes	Yes	Yes	No	No	Glioblastoma	G4	Dead	30.6
FAHZZU_0381	Yes	Yes	No	No	No	No	No	Glioblastoma	G4	Dead	30.7
FAHZZU_0425	Yes	Yes	No	No	No	No	No	Glioblastoma	G4	Dead	30.7
FAHZZU_0891	Yes	Yes	Yes	Yes	Yes	No	No	Glioblastoma	G4	Dead	30.8
FAHZZU_0488	Yes	Yes	No	No	No	No	No	Glioblastoma	G4	Alive	31
FAHZZU_1013	Yes	Yes	Yes	Yes	Yes	No	No	Glioblastoma	G4	Dead	31
FAHZZU_0336	Yes	Yes	No	No	No	No	No	Glioblastoma	G4	Dead	31.1
FAHZZU_1032	Yes	Yes	No	No	No	No	No	Glioblastoma	G4	Dead	31.1
FAHZZU_1139	No	Yes	Yes	Yes	Yes	No	No	Glioblastoma	G4	Alive	31.1
FAHZZU_0182	Yes	Yes	No	No	No	No	No	Glioblastoma	G4	Dead	31.2
FAHZZU_0376	Yes	Yes	No	No	No	No	No	Glioblastoma	G4	Dead	31.3
FAHZZU_0557	Yes	Yes	No	No	No	No	No	Glioblastoma	G4	Dead	31.5
FAHZZU_0461	No	Yes	No	No	No	No	No	Glioblastoma	G4	Dead	31.6
FAHZZU_0658	No	Yes	No	No	No	No	No	Glioblastoma	G4	Dead	31.6
FAHZZU_0290	Yes	Yes	No	No	No	No	No	Glioblastoma	G4	Dead	31.7
FAHZZU_0171	Yes	Yes	No	No	No	No	No	Glioblastoma	G4	Dead	31.9
FAHZZU_0285	Yes	Yes	No	No	No	No	No	Glioblastoma	G4	Alive	32
FAHZZU_0563	Yes	Yes	No	No	No	No	No	Glioblastoma	G4	Dead	32
FAHZZU_0835	Yes	Yes	Yes	Yes	Yes	No	No	Glioblastoma	G4	Dead	32.1
FAHZZU_1132	No	Yes	Yes	Yes	Yes	No	No	Glioblastoma	G4	Alive	32.1
FAHZZU_0802	Yes	Yes	No	No	No	No	No	Glioblastoma	G4	Dead	32.3
FAHZZU_0179	Yes	Yes	No	No	No	No	No	Glioblastoma	G4	Dead	32.6
FAHZZU_0998	Yes	Yes	Yes	Yes	Yes	No	No	Glioblastoma	G4	Dead	32.6
FAHZZU_0604	No	Yes	No	No	No	No	No	Glioblastoma	G4	Dead	32.7
FAHZZU_1127	No	Yes	Yes	Yes	Yes	No	No	Glioblastoma	G4	Alive	32.77
FAHZZU_0072	Yes	Yes	No	No	No	No	No	Glioblastoma	G4	Dead	33
FAHZZU_1120	Yes	Yes	Yes	Yes	Yes	No	No	Glioblastoma	G4	Alive	33.1
FAHZZU_0579	No	Yes	Yes	Yes	Yes	No	No	Glioblastoma	G4	Alive	33.2
FAHZZU_0597	Yes	Yes	No	No	No	No	No	Glioblastoma	G4	Dead	33.6
FAHZZU_0777	No	Yes	No	No	No	No	No	Glioblastoma	G4	Dead	33.6
FAHZZU_0542	No	Yes	No	No	No	No	No	Glioblastoma	G4	Dead	34
FAHZZU_0939	Yes	Yes	Yes	Yes	Yes	No	No	Glioblastoma	G4	Dead	34.4
FAHZZU_0649	No	Yes	No	No	No	No	No	Glioblastoma	G4	Dead	34.5
FAHZZU_0667	No	Yes	No	No	No	No	No	Glioblastoma	G4	Dead	34.5
FAHZZU_0147	Yes	Yes	No	No	No	No	No	Glioblastoma	G4	Dead	34.6
FAHZZU_1107	Yes	Yes	No	No	No	No	No	Glioblastoma	G4	Dead	34.6
FAHZZU_0166	Yes	Yes	No	No	No	No	No	Glioblastoma	G4	Dead	34.7
FAHZZU_0584	Yes	Yes	No	No	No	No	No	Glioblastoma	G4	Dead	34.7
FAHZZU_0482	Yes	Yes	No	No	No	No	No	Glioblastoma	G4	Dead	34.8
FAHZZU_0815	Yes	Yes	No	No	No	No	No	Glioblastoma	G4	Dead	34.8
FAHZZU_0817	Yes	Yes	No	No	No	No	No	Glioblastoma	G4	Dead	34.8
FAHZZU_0018	Yes	Yes	No	No	No	No	No	Glioblastoma	G4	Dead	34.9
FAHZZU_0184	Yes	Yes	No	No	No	No	No	Glioblastoma	G4	Dead	35
FAHZZU_0401	Yes	Yes	No	No	No	No	No	Glioblastoma	G4	Dead	35
FAHZZU_0420	Yes	Yes	No	No	No	No	No	Glioblastoma	G4	Alive	35
FAHZZU_1156	Yes	Yes	Yes	Yes	Yes	No	No	Glioblastoma	G4	Dead	35
FAHZZU_0623	Yes	Yes	No	No	No	No	No	Glioblastoma	G4	Dead	35.1
FAHZZU_0055	No	Yes	No	No	No	No	No	Glioblastoma	G4	Dead	35.4
FAHZZU_0813	Yes	Yes	No	No	No	No	No	Glioblastoma	G4	Dead	35.4
FAHZZU_0400	No	Yes	No	No	No	No	No	Glioblastoma	G4	Dead	35.5
FAHZZU_0625	Yes	Yes	No	No	No	No	No	Glioblastoma	G4	Dead	35.5
FAHZZU_0626	Yes	Yes	No	No	No	No	No	Glioblastoma	G4	Dead	35.5
FAHZZU_0611	Yes	Yes	No	No	No	No	No	Glioblastoma	G4	Dead	35.7
FAHZZU_0734	Yes	Yes	No	No	No	No	No	Glioblastoma	G4	Dead	35.7
FAHZZU_0806	Yes	Yes	No	No	No	No	No	Glioblastoma	G4	Dead	35.8
FAHZZU_0082	Yes	Yes	No	No	No	No	No	Glioblastoma	G4	Dead	36
FAHZZU_0172	Yes	No	No	No	No	No	No	Glioblastoma	G4	Dead	36
FAHZZU_0265	Yes	Yes	No	No	No	No	No	Glioblastoma	G4	Dead	36
FAHZZU_0338	Yes	Yes	No	No	No	No	No	Glioblastoma	G4	Dead	36
FAHZZU_0342	Yes	Yes	No	No	No	No	No	Glioblastoma	G4	Dead	36
FAHZZU_0344	No	Yes	No	No	No	No	No	Glioblastoma	G4	Dead	36
FAHZZU_0743	Yes	Yes	No	No	No	No	No	Glioblastoma	G4	Dead	36
FAHZZU_0703	Yes	Yes	No	No	No	No	No	Glioblastoma	G4	Dead	36.1
FAHZZU_0742	Yes	Yes	No	No	No	No	No	Glioblastoma	G4	Dead	36.1
FAHZZU_0794	Yes	Yes	No	No	No	No	No	Glioblastoma	G4	Dead	36.1
FAHZZU_0617	No	Yes	No	No	No	No	No	Glioblastoma	G4	Dead	36.12
FAHZZU_0560	No	Yes	No	No	No	No	No	Glioblastoma	G4	Dead	36.2
FAHZZU_0605	Yes	Yes	No	No	No	No	No	Glioblastoma	G4	Dead	36.2
FAHZZU_0019	Yes	Yes	No	No	No	No	No	Glioblastoma	G4	Dead	36.3
FAHZZU_0548	Yes	Yes	No	No	No	No	No	Glioblastoma	G4	Dead	36.7
FAHZZU_0782	Yes	Yes	No	No	No	No	No	Glioblastoma	G4	Dead	36.7
FAHZZU_0728	Yes	Yes	No	No	No	No	No	Glioblastoma	G4	Dead	36.9
FAHZZU_0256	No	Yes	No	No	No	No	No	Glioblastoma	G4	Alive	37
FAHZZU_0257	Yes	Yes	No	No	No	No	No	Glioblastoma	G4	Dead	37
FAHZZU_0358	Yes	Yes	No	No	No	No	No	Glioblastoma	G4	Dead	37
FAHZZU_0666	Yes	Yes	No	No	No	No	No	Glioblastoma	G4	Dead	37
FAHZZU_0948	Yes	Yes	Yes	Yes	Yes	No	No	Glioblastoma	G4	Dead	37
FAHZZU_0966	Yes	Yes	Yes	Yes	Yes	No	No	Glioblastoma	G4	Dead	37
FAHZZU_0687	Yes	Yes	No	No	No	No	No	Glioblastoma	G4	Dead	37.2
FAHZZU_0773	Yes	Yes	No	No	No	No	No	Glioblastoma	G4	Dead	37.2
FAHZZU_0553	No	Yes	No	No	No	No	No	Glioblastoma	G4	Dead	37.3
FAHZZU_0883	Yes	Yes	No	No	No	No	No	Glioblastoma	G4	Dead	37.3
FAHZZU_0905	Yes	No	No	No	No	No	No	Glioblastoma	G4	Dead	37.3
FAHZZU_0716	Yes	Yes	No	No	No	No	No	Glioblastoma	G4	Dead	37.7
FAHZZU_0766	Yes	No	No	No	No	No	No	Glioblastoma	G4	Dead	37.8
FAHZZU_0956	Yes	Yes	Yes	Yes	Yes	No	No	Glioblastoma	G4	Dead	37.8
FAHZZU_0850	Yes	Yes	Yes	Yes	Yes	No	No	Glioblastoma	G4	Dead	37.85
FAHZZU_0521	Yes	Yes	No	No	No	No	No	Glioblastoma	G4	Dead	37.9
FAHZZU_0248	Yes	Yes	No	No	No	No	No	Glioblastoma	G4	Alive	38
FAHZZU_0762	Yes	Yes	No	No	No	No	No	Glioblastoma	G4	Dead	38.1
FAHZZU_0651	Yes	Yes	No	No	No	No	No	Glioblastoma	G4	Dead	38.3
FAHZZU_1110	Yes	Yes	No	No	No	No	No	Glioblastoma	G4	Dead	38.3
FAHZZU_1111	Yes	Yes	No	No	No	No	No	Glioblastoma	G4	Alive	38.33
FAHZZU_0981	Yes	Yes	Yes	Yes	Yes	No	No	Glioblastoma	G4	Dead	38.38
FAHZZU_0758	Yes	Yes	No	No	No	No	No	Glioblastoma	G4	Dead	38.5
FAHZZU_0906	Yes	Yes	No	No	No	No	No	Glioblastoma	G4	Dead	38.6
FAHZZU_0965	Yes	Yes	Yes	Yes	Yes	No	No	Glioblastoma	G4	Dead	38.6
FAHZZU_0744	Yes	Yes	No	No	No	No	No	Glioblastoma	G4	Dead	38.8
FAHZZU_0979	Yes	Yes	No	No	No	No	No	Glioblastoma	G4	Dead	38.99
FAHZZU_0245	Yes	Yes	No	No	No	No	No	Glioblastoma	G4	Alive	39
FAHZZU_0573	Yes	Yes	No	No	No	No	No	Glioblastoma	G4	Dead	39
FAHZZU_1097	Yes	Yes	No	No	No	No	No	Glioblastoma	G4	Alive	39
FAHZZU_0578	Yes	Yes	No	No	No	No	No	Glioblastoma	G4	Dead	39.1
FAHZZU_0761	Yes	Yes	No	No	No	No	No	Glioblastoma	G4	Dead	39.1
FAHZZU_0934	Yes	Yes	Yes	Yes	Yes	No	No	Glioblastoma	G4	Dead	39.15
FAHZZU_0526	Yes	Yes	No	No	No	No	No	Glioblastoma	G4	Dead	39.2
FAHZZU_0699	Yes	Yes	No	No	No	No	No	Glioblastoma	G4	Dead	39.2
FAHZZU_1083	No	Yes	No	No	No	No	No	Glioblastoma	G4	Dead	39.27
FAHZZU_1091	Yes	Yes	No	No	No	No	No	Glioblastoma	G4	Dead	39.4
FAHZZU_0912	Yes	Yes	No	Yes	No	No	No	Glioblastoma	G4	Dead	39.45
FAHZZU_0394	Yes	Yes	No	No	No	No	No	Glioblastoma	G4	Dead	39.6
FAHZZU_0900	Yes	Yes	Yes	Yes	Yes	No	No	Glioblastoma	G4	Dead	39.8
FAHZZU_0874	Yes	Yes	No	No	No	No	No	Glioblastoma	G4	Dead	39.95
FAHZZU_0491	Yes	Yes	No	No	No	No	No	Glioblastoma	G4	Dead	40
FAHZZU_0552	Yes	Yes	No	No	No	No	No	Glioblastoma	G4	Dead	40
FAHZZU_0678	Yes	Yes	No	No	No	No	No	Glioblastoma	G4	Dead	40
FAHZZU_0710	Yes	Yes	No	No	No	No	No	Glioblastoma	G4	Dead	40
FAHZZU_0739	Yes	Yes	No	No	No	No	No	Glioblastoma	G4	Dead	40
FAHZZU_0862	Yes	Yes	No	No	No	No	No	Glioblastoma	G4	Dead	40.1
FAHZZU_0917	Yes	Yes	No	Yes	No	No	No	Glioblastoma	G4	Dead	40.15
FAHZZU_0253	Yes	Yes	No	No	No	No	No	Glioblastoma	G4	Dead	40.2
FAHZZU_0590	Yes	Yes	No	No	No	No	No	Glioblastoma	G4	Dead	40.2
FAHZZU_0918	Yes	Yes	Yes	Yes	Yes	No	No	Glioblastoma	G4	Dead	40.25
FAHZZU_0640	No	Yes	No	No	No	No	No	Glioblastoma	G4	Dead	40.3
FAHZZU_0881	Yes	Yes	Yes	Yes	Yes	No	No	Glioblastoma	G4	Dead	40.4
FAHZZU_0877	Yes	Yes	No	No	No	No	No	Glioblastoma	G4	Dead	40.45
FAHZZU_0726	Yes	Yes	No	No	No	No	No	Glioblastoma	G4	Dead	40.5
FAHZZU_1073	No	Yes	No	No	No	No	No	Glioblastoma	G4	Alive	40.5
FAHZZU_0833	Yes	Yes	No	No	No	No	No	Glioblastoma	G4	Dead	40.6
FAHZZU_1076	Yes	Yes	No	No	No	No	No	Glioblastoma	G4	Alive	40.63
FAHZZU_0530	Yes	Yes	No	No	No	No	No	Glioblastoma	G4	Dead	40.7
FAHZZU_0217	No	Yes	No	No	No	No	No	Glioblastoma	G4	Alive	41
FAHZZU_0528	Yes	Yes	No	No	No	No	No	Glioblastoma	G4	Dead	41
FAHZZU_0600	Yes	Yes	No	No	No	No	No	Glioblastoma	G4	Dead	41
FAHZZU_0832	Yes	Yes	No	No	No	No	No	Glioblastoma	G4	Dead	41
FAHZZU_0282	Yes	Yes	No	No	No	No	No	Glioblastoma	G4	Alive	41.1
FAHZZU_0879	Yes	Yes	Yes	Yes	Yes	No	No	Glioblastoma	G4	Dead	41.3
FAHZZU_0878	Yes	Yes	No	No	No	No	No	Glioblastoma	G4	Dead	41.5
FAHZZU_1067	No	Yes	No	No	No	No	No	Glioblastoma	G4	Alive	41.7
FAHZZU_0843	Yes	Yes	Yes	Yes	Yes	No	No	Glioblastoma	G4	Dead	41.87
FAHZZU_0093	No	Yes	No	No	No	No	No	Glioblastoma	G4	Dead	41.9
FAHZZU_0204	Yes	Yes	No	No	No	No	No	Glioblastoma	G4	Alive	42
FAHZZU_0321	Yes	Yes	No	No	No	No	No	Glioblastoma	G4	Alive	42
FAHZZU_0704	Yes	Yes	No	No	No	No	No	Glioblastoma	G4	Dead	42
FAHZZU_0431	Yes	Yes	No	No	No	No	No	Glioblastoma	G4	Dead	42.1
FAHZZU_0017	Yes	Yes	No	No	No	No	No	Glioblastoma	G4	Dead	42.3
FAHZZU_0837	Yes	Yes	No	No	No	No	No	Glioblastoma	G4	Dead	42.3
FAHZZU_0851	Yes	Yes	No	No	No	No	No	Glioblastoma	G4	Dead	42.3
FAHZZU_0849	Yes	Yes	No	Yes	No	No	No	Glioblastoma	G4	Dead	42.4
FAHZZU_0405	Yes	Yes	No	No	No	No	No	Glioblastoma	G4	Dead	42.6
FAHZZU_0940	Yes	Yes	No	No	No	No	No	Glioblastoma	G4	Dead	42.8
FAHZZU_0701	Yes	Yes	No	No	No	No	No	Glioblastoma	G4	Dead	42.9
FAHZZU_0198	Yes	Yes	No	No	No	No	No	Glioblastoma	G4	Alive	43
FAHZZU_0799	Yes	Yes	No	No	No	No	No	Glioblastoma	G4	Dead	43.1
FAHZZU_1017	Yes	Yes	Yes	Yes	Yes	No	No	Glioblastoma	G4	Alive	43.13
FAHZZU_0754	Yes	Yes	Yes	Yes	Yes	No	No	Glioblastoma	G4	Dead	43.2
FAHZZU_0683	Yes	Yes	No	No	No	No	No	Glioblastoma	G4	Dead	43.3
FAHZZU_0695	Yes	Yes	No	No	No	No	No	Glioblastoma	G4	Dead	43.4
FAHZZU_1009	Yes	Yes	Yes	Yes	Yes	No	No	Glioblastoma	G4	Alive	43.4
FAHZZU_1011	Yes	Yes	Yes	Yes	Yes	No	No	Glioblastoma	G4	Alive	43.4
FAHZZU_0959	Yes	Yes	Yes	Yes	Yes	No	No	Glioblastoma	G4	Dead	43.47
FAHZZU_0637	Yes	Yes	No	No	No	No	No	Glioblastoma	G4	Dead	43.5
FAHZZU_0692	Yes	Yes	No	No	No	No	No	Glioblastoma	G4	Dead	43.7
FAHZZU_1007	Yes	Yes	Yes	Yes	Yes	No	No	Glioblastoma	G4	Alive	43.73
FAHZZU_1004	Yes	Yes	Yes	Yes	Yes	No	No	Glioblastoma	G4	Alive	43.83
FAHZZU_0194	No	Yes	No	No	No	No	No	Glioblastoma	G4	Alive	44
FAHZZU_0195	No	Yes	No	No	No	No	No	Glioblastoma	G4	Alive	44
FAHZZU_0368	No	Yes	No	No	No	No	No	Glioblastoma	G4	Dead	44
FAHZZU_0997	Yes	Yes	Yes	Yes	Yes	No	No	Glioblastoma	G4	Alive	44
FAHZZU_0682	Yes	Yes	No	No	No	No	No	Glioblastoma	G4	Dead	44.1
FAHZZU_1044	Yes	Yes	No	No	No	No	No	Glioblastoma	G4	Alive	44.1
FAHZZU_1038	Yes	Yes	No	No	No	No	No	Glioblastoma	G4	Alive	44.7
FAHZZU_0976	Yes	Yes	Yes	Yes	Yes	No	No	Glioblastoma	G4	Alive	45
FAHZZU_1029	Yes	Yes	No	No	No	No	No	Glioblastoma	G4	Alive	45
FAHZZU_0984	Yes	Yes	Yes	Yes	Yes	No	No	Glioblastoma	G4	Alive	45.1
FAHZZU_0825	Yes	Yes	No	No	No	No	No	Glioblastoma	G4	Dead	45.6
FAHZZU_0973	Yes	Yes	Yes	Yes	Yes	No	No	Glioblastoma	G4	Alive	45.63
FAHZZU_0644	Yes	Yes	No	No	No	No	No	Glioblastoma	G4	Dead	45.7
FAHZZU_0173	No	Yes	No	No	No	No	No	Glioblastoma	G4	Alive	46
FAHZZU_0960	Yes	Yes	Yes	Yes	Yes	No	No	Glioblastoma	G4	Alive	46
FAHZZU_0972	Yes	Yes	No	No	No	No	No	Glioblastoma	G4	Alive	46
FAHZZU_0656	Yes	Yes	No	No	No	No	No	Glioblastoma	G4	Alive	46.1
FAHZZU_0561	Yes	Yes	No	No	No	No	No	Glioblastoma	G4	Dead	46.2
FAHZZU_0954	Yes	Yes	Yes	Yes	Yes	No	No	Glioblastoma	G4	Alive	46.37
FAHZZU_0499	Yes	Yes	No	No	No	No	No	Glioblastoma	G4	Dead	46.4
FAHZZU_0246	Yes	Yes	No	No	No	No	No	Glioblastoma	G4	Alive	46.5
FAHZZU_0366	Yes	Yes	No	No	No	No	No	Glioblastoma	G4	Alive	46.7
FAHZZU_0944	Yes	Yes	No	Yes	No	No	No	Glioblastoma	G4	Alive	46.7
FAHZZU_0170	Yes	Yes	No	No	No	No	No	Glioblastoma	G4	Alive	47
FAHZZU_0936	Yes	Yes	No	Yes	No	No	No	Glioblastoma	G4	Alive	47.04
FAHZZU_0144	Yes	Yes	No	No	No	No	No	Glioblastoma	G4	Dead	47.1
FAHZZU_0950	Yes	Yes	No	No	No	No	No	Glioblastoma	G4	Alive	47.2
FAHZZU_0943	Yes	Yes	No	No	No	No	No	Glioblastoma	G4	Alive	47.3
FAHZZU_0021	Yes	Yes	No	No	No	No	No	Glioblastoma	G4	Dead	47.5
FAHZZU_0955	No	Yes	No	No	No	No	No	Glioblastoma	G4	Dead	47.6
FAHZZU_0161	Yes	Yes	No	No	No	No	No	Glioblastoma	G4	Alive	48
FAHZZU_0929	Yes	Yes	No	No	No	No	No	Glioblastoma	G4	Alive	48.2
FAHZZU_0958	Yes	Yes	Yes	Yes	Yes	No	No	Glioblastoma	G4	Dead	48.3
FAHZZU_0790	No	Yes	No	No	No	No	No	Glioblastoma	G4	Dead	48.37
FAHZZU_0752	Yes	Yes	No	No	No	No	No	Glioblastoma	G4	Alive	48.5
FAHZZU_0893	Yes	Yes	No	Yes	No	No	No	Glioblastoma	G4	Alive	48.83
FAHZZU_0888	Yes	Yes	Yes	Yes	Yes	No	No	Glioblastoma	G4	Dead	48.9
FAHZZU_0870	Yes	Yes	Yes	Yes	Yes	No	No	Glioblastoma	G4	Alive	49.1
FAHZZU_0904	Yes	Yes	Yes	Yes	Yes	No	No	Glioblastoma	G4	Alive	49.1
FAHZZU_0787	Yes	Yes	No	No	No	No	No	Glioblastoma	G4	Dead	49.4
FAHZZU_0871	Yes	Yes	Yes	Yes	Yes	No	No	Glioblastoma	G4	Alive	49.53
FAHZZU_0268	No	Yes	No	No	No	No	No	Glioblastoma	G4	Alive	49.6
FAHZZU_0868	Yes	Yes	Yes	Yes	Yes	No	No	Glioblastoma	G4	Alive	49.63
FAHZZU_0434	Yes	Yes	No	No	No	No	No	Glioblastoma	G4	Dead	49.8
FAHZZU_0896	Yes	Yes	No	No	No	No	No	Glioblastoma	G4	Alive	49.87
FAHZZU_0531	No	Yes	No	No	No	No	No	Glioblastoma	G4	Dead	50
FAHZZU_0860	Yes	Yes	Yes	Yes	Yes	No	No	Glioblastoma	G4	Alive	50.7
FAHZZU_0126	Yes	Yes	No	No	No	No	No	Glioblastoma	G4	Dead	51.7
FAHZZU_0828	Yes	Yes	No	No	No	No	No	Glioblastoma	G4	Alive	52.3
FAHZZU_0830	Yes	Yes	No	No	No	No	No	Glioblastoma	G4	Alive	52.3
FAHZZU_0791	Yes	Yes	Yes	Yes	Yes	No	No	Glioblastoma	G4	Alive	52.73
FAHZZU_0113	Yes	Yes	No	No	No	No	No	Glioblastoma	G4	Alive	53
FAHZZU_0135	Yes	Yes	No	No	No	No	No	Glioblastoma	G4	Dead	53
FAHZZU_0684	Yes	Yes	No	No	No	No	No	Glioblastoma	G4	Dead	53
FAHZZU_0783	Yes	Yes	No	Yes	No	No	No	Glioblastoma	G4	Alive	53.27
FAHZZU_0511	Yes	Yes	No	No	No	No	No	Glioblastoma	G4	Dead	53.3
FAHZZU_0801	Yes	Yes	No	No	No	No	No	Glioblastoma	G4	Alive	53.5
FAHZZU_0385	Yes	Yes	No	No	No	No	No	Glioblastoma	G4	Dead	54.1
FAHZZU_0804	No	Yes	No	No	No	No	No	Glioblastoma	G4	Dead	54.23
FAHZZU_0453	Yes	Yes	No	No	No	No	No	Glioblastoma	G4	Dead	54.3
FAHZZU_0784	Yes	Yes	No	No	No	No	No	Glioblastoma	G4	Alive	54.6
FAHZZU_0755	Yes	Yes	Yes	Yes	Yes	No	No	Glioblastoma	G4	Alive	54.9
FAHZZU_0417	Yes	Yes	No	No	No	No	No	Glioblastoma	G4	Dead	57
FAHZZU_0419	Yes	Yes	No	No	No	No	No	Glioblastoma	G4	Dead	57
FAHZZU_0458	Yes	Yes	No	No	No	No	No	Glioblastoma	G4	Dead	57.7
FAHZZU_0460	No	Yes	No	No	No	No	No	Glioblastoma	G4	Dead	57.77
FAHZZU_0406	Yes	Yes	No	No	No	No	No	Glioblastoma	G4	Dead	58
FAHZZU_0740	No	Yes	No	No	No	No	No	Glioblastoma	G4	Alive	58.13
FAHZZU_0648	Yes	Yes	No	No	No	No	No	Glioblastoma	G4	Dead	58.2
FAHZZU_0721	Yes	Yes	No	No	No	No	No	Glioblastoma	G4	Alive	58.3
FAHZZU_0439	Yes	Yes	No	No	No	No	No	Glioblastoma	G4	Dead	59
FAHZZU_0185	Yes	Yes	No	No	No	No	No	Glioblastoma	G4	Alive	59.8
FAHZZU_0076	Yes	Yes	No	No	No	No	No	Glioblastoma	G4	Alive	60
FAHZZU_0702	Yes	Yes	No	No	No	No	No	Glioblastoma	G4	Alive	60.2
FAHZZU_0094	Yes	Yes	No	No	No	No	No	Glioblastoma	G4	Dead	60.3
FAHZZU_0462	Yes	Yes	No	No	No	No	No	Glioblastoma	G4	Dead	60.3
FAHZZU_0707	No	Yes	No	No	No	No	No	Glioblastoma	G4	Dead	60.57
FAHZZU_0258	No	Yes	No	No	No	No	No	Glioblastoma	G4	Dead	62
FAHZZU_0146	Yes	Yes	No	No	No	No	No	Glioblastoma	G4	Alive	63
FAHZZU_0303	Yes	Yes	No	No	No	No	No	Glioblastoma	G4	Dead	63.4
FAHZZU_0139	Yes	Yes	No	No	No	No	No	Glioblastoma	G4	Dead	63.8
FAHZZU_0306	Yes	Yes	No	No	No	No	No	Glioblastoma	G4	Dead	64
FAHZZU_0346	Yes	Yes	No	No	No	No	No	Glioblastoma	G4	Dead	64.6
FAHZZU_0042	Yes	Yes	No	No	No	No	No	Glioblastoma	G4	Alive	65
FAHZZU_0301	Yes	Yes	No	No	No	No	No	Glioblastoma	G4	Dead	65.2
FAHZZU_0326	Yes	Yes	No	No	No	No	No	Glioblastoma	G4	Dead	65.3
FAHZZU_0330	No	Yes	No	No	No	No	No	Glioblastoma	G4	Dead	65.7
FAHZZU_0609	Yes	Yes	No	No	No	No	No	Glioblastoma	G4	Alive	66
FAHZZU_0295	No	Yes	No	No	No	No	No	Glioblastoma	G4	Dead	66.2
FAHZZU_0310	Yes	Yes	No	No	No	No	No	Glioblastoma	G4	Dead	67
FAHZZU_0154	Yes	Yes	No	No	No	No	No	Glioblastoma	G4	Dead	67.8
FAHZZU_0593	No	Yes	No	No	No	No	No	Glioblastoma	G4	Alive	68.37
FAHZZU_0639	Yes	Yes	No	No	No	No	No	Glioblastoma	G4	Dead	68.53
FAHZZU_0272	Yes	Yes	No	No	No	No	No	Glioblastoma	G4	Dead	68.9
FAHZZU_0538	Yes	Yes	No	No	No	No	No	Glioblastoma	G4	Alive	70
FAHZZU_0277	Yes	Yes	No	No	No	No	No	Glioblastoma	G4	Dead	70.1
FAHZZU_0404	Yes	Yes	No	No	No	No	No	Glioblastoma	G4	Dead	72.3
FAHZZU_0231	No	Yes	No	No	No	No	No	Glioblastoma	G4	Dead	72.6
FAHZZU_0292	Yes	Yes	No	No	No	No	No	Glioblastoma	G4	Dead	73
FAHZZU_0474	Yes	Yes	No	No	No	No	No	Glioblastoma	G4	Alive	73.8
FAHZZU_0114	Yes	Yes	No	No	No	No	No	Glioblastoma	G4	Alive	74.7
FAHZZU_0360	Yes	Yes	No	No	No	No	No	Glioblastoma	G4	Alive	81.8
FAHZZU_0350	No	Yes	No	No	No	No	No	Glioblastoma	G4	Alive	82.3
FAHZZU_0006	Yes	Yes	No	No	No	No	No	Glioblastoma	G4	Dead	83
FAHZZU_0005	Yes	Yes	No	No	No	No	No	Glioblastoma	G4	Alive	84
FAHZZU_0037	Yes	Yes	No	No	No	No	No	Glioblastoma	G4	Dead	84.2
FAHZZU_0104	Yes	Yes	No	No	No	No	No	Glioblastoma	G4	Dead	89.2
FAHZZU_0188	Yes	Yes	No	No	No	No	No	Glioblastoma	G4	Alive	99.9
FAHZZU_0106	Yes	Yes	No	No	No	No	No	Glioblastoma	G4	Alive	110.1
FAHZZU_0049	No	Yes	No	No	No	No	No	Glioblastoma	G4	Alive	122.8
