# Supplementary material for: Machine Learning Model on Multi-Omics Data Enables Risk Stratification and Identifies Molecular Heterogeneity and Therapeutic Targets in Glioblastoma
Source: Research Square preprint supplement (doi:10.21203/rs.3.rs-7510857/v1), 2025-09-12
Supplement: Supplementary file 3 [file ea7e4bee07fd919b492f0e46.docx]

Supplementary Materials for

**Machine Learning Model on Multi-Omics Data Enables Risk Stratification and Identifies Molecular Heterogeneity and Therapeutic Targets in Glioblastoma**

Zhenyu Zhang *et al.*

*Corresponding author. Email: mrdmyan@163.com

**This PDF file includes:**

Figs. S1 to S9

**Other Supplementary Materials for this manuscript include the following:**

Data S1 to S2

Fig. S1.


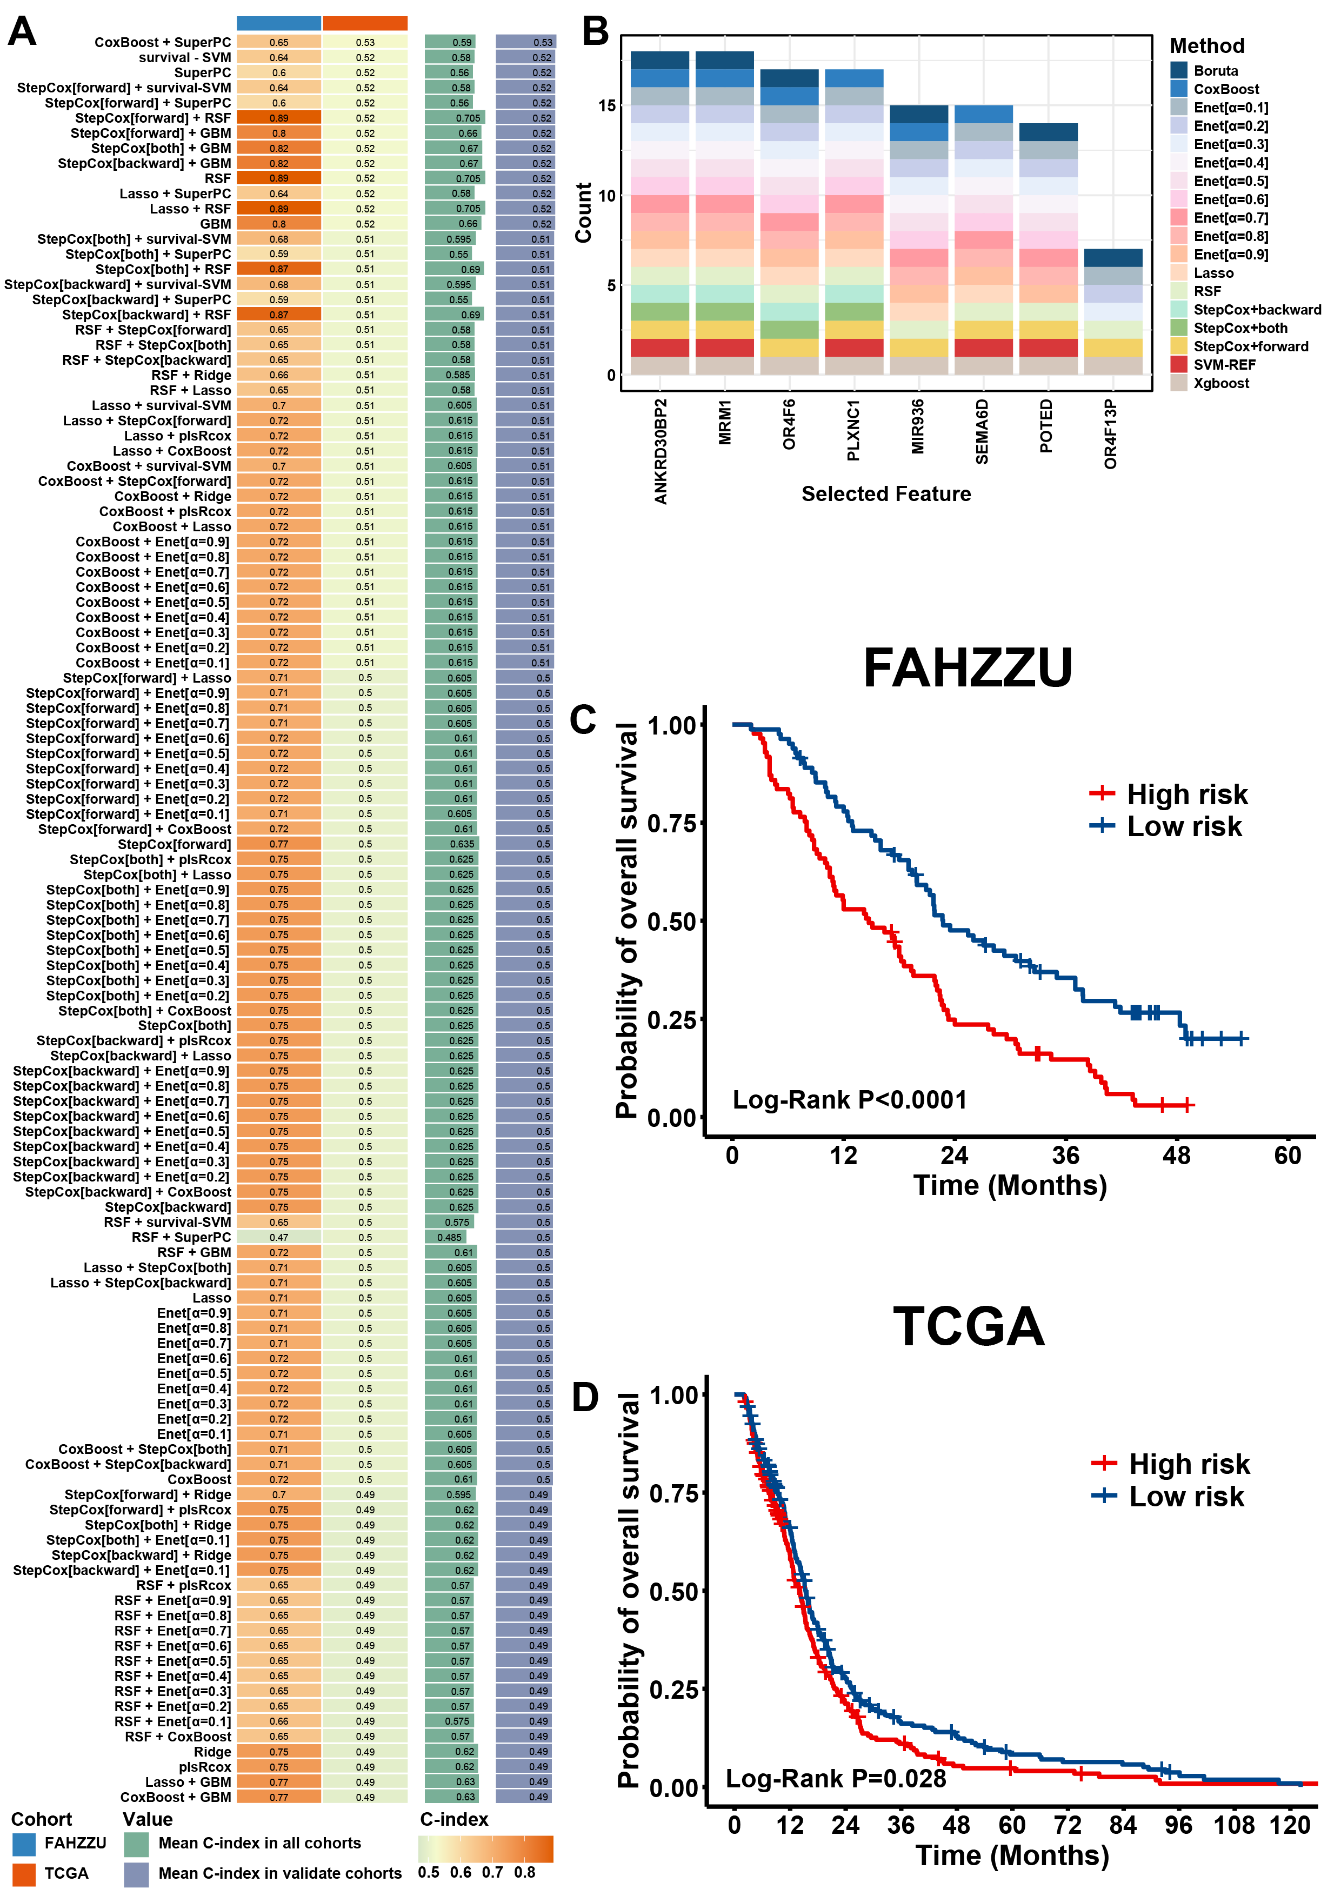


The process and results of modeling and validating the CNV model.

(A) The C-index of 101 combinatorial models based on 10 different algorithms.

(B) Core prognostic features of the CNV model.

(C) KM analysis validation based on CNV data from the FAHZZU cohort.

(D) KM analysis validation based on CNV data from the TCGA cohort.

Fig. S2.


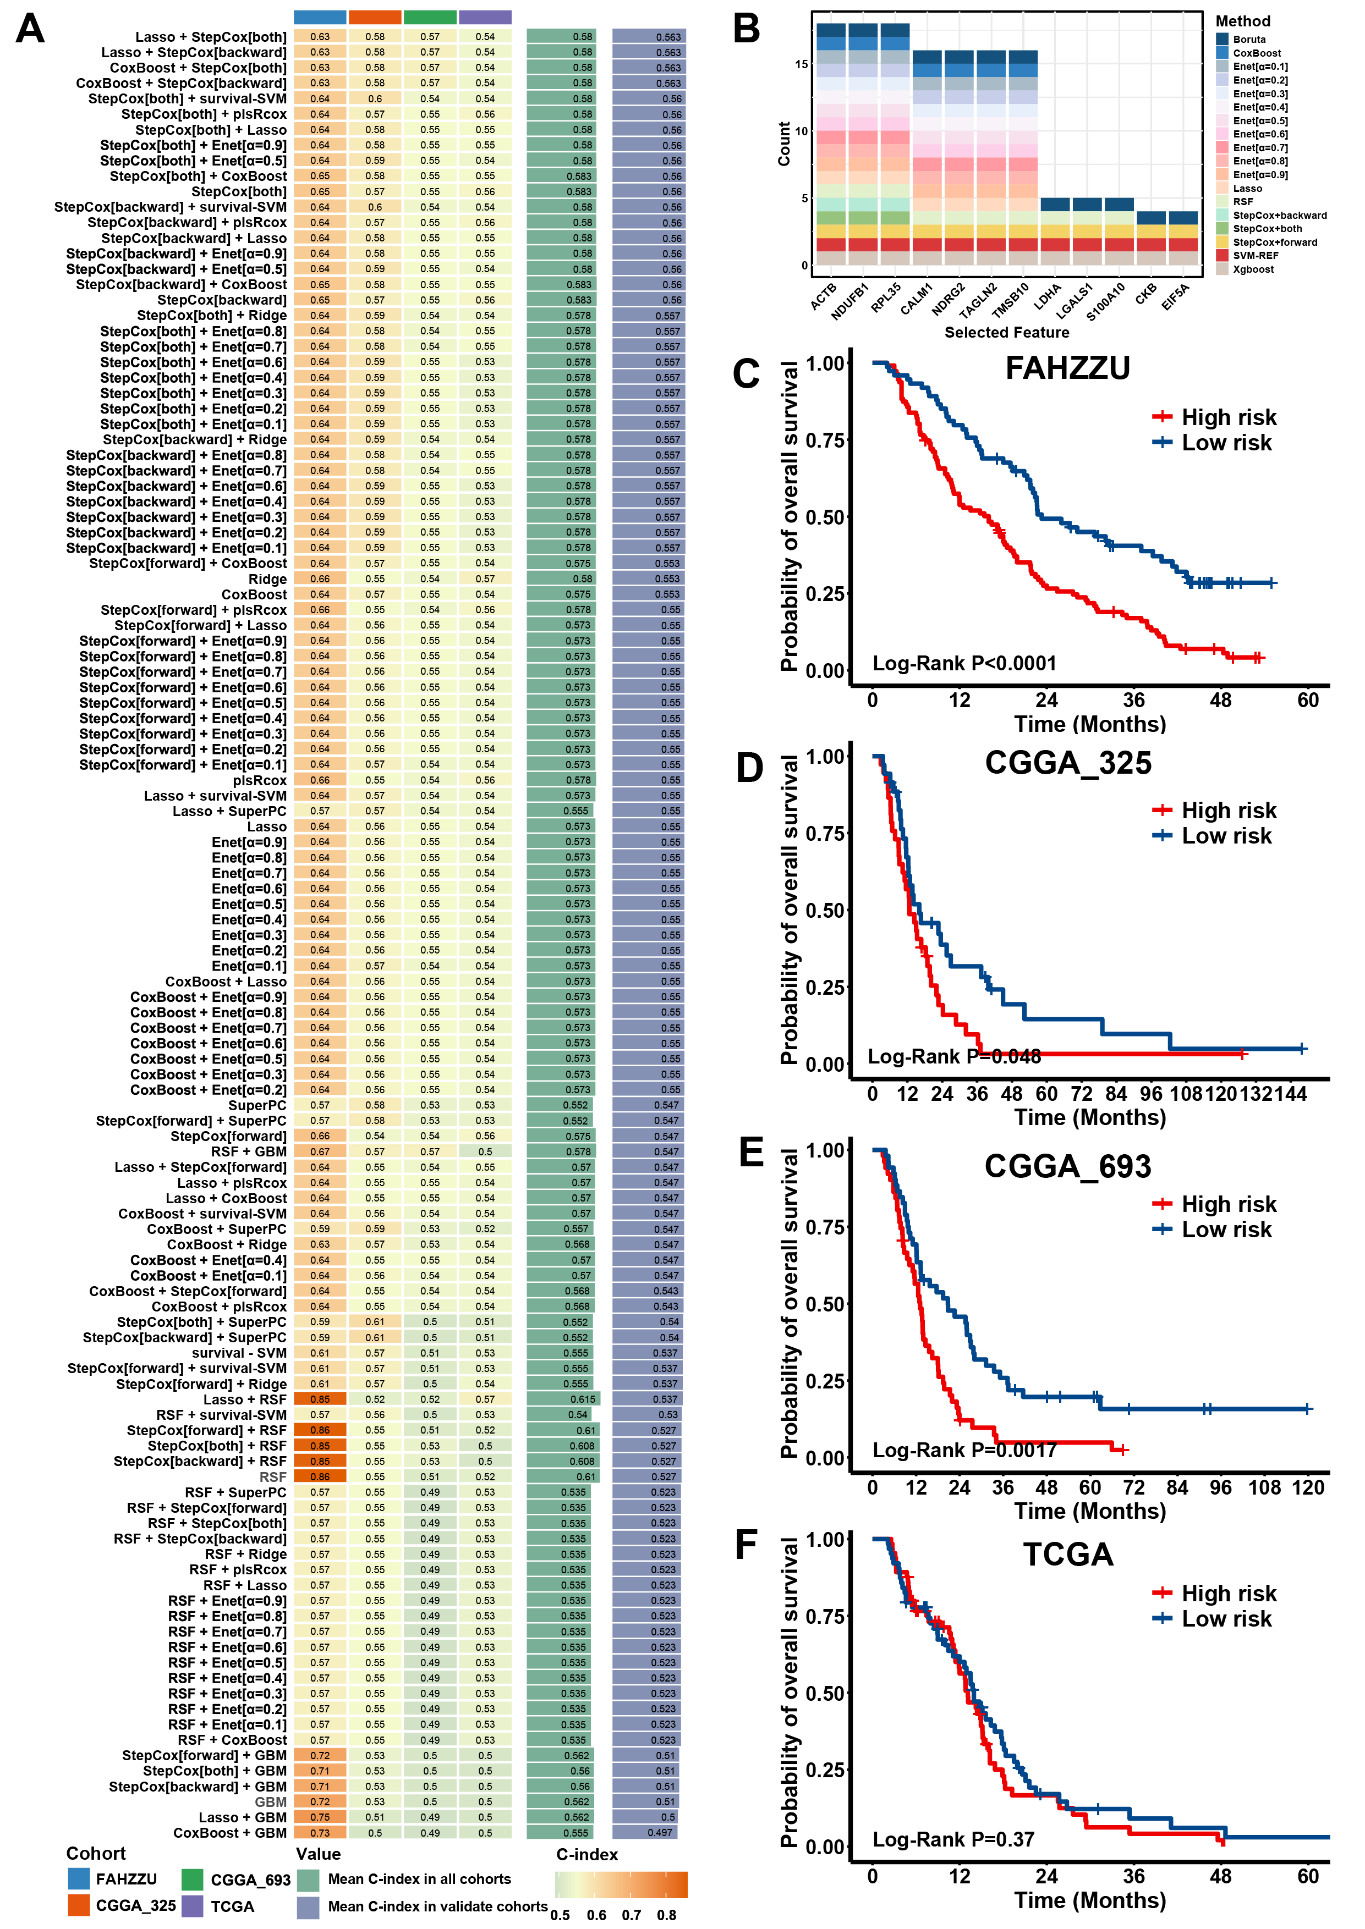


The process and results of modeling and validating the mRNA model.

(A) The C-index of 101 combinatorial models based on 10 different algorithms.

(B) Core prognostic features of the mRNA model.

(C) KM analysis validation based on mRNA data from the FAHZZU cohort.

(D) KM analysis validation based on mRNA data from the CGGA325 cohort.

(E) KM analysis validation based on mRNA data from the CGGA693 cohort.

(F) KM analysis validation based on mRNA data from the TCGA cohort.

Fig. S3.


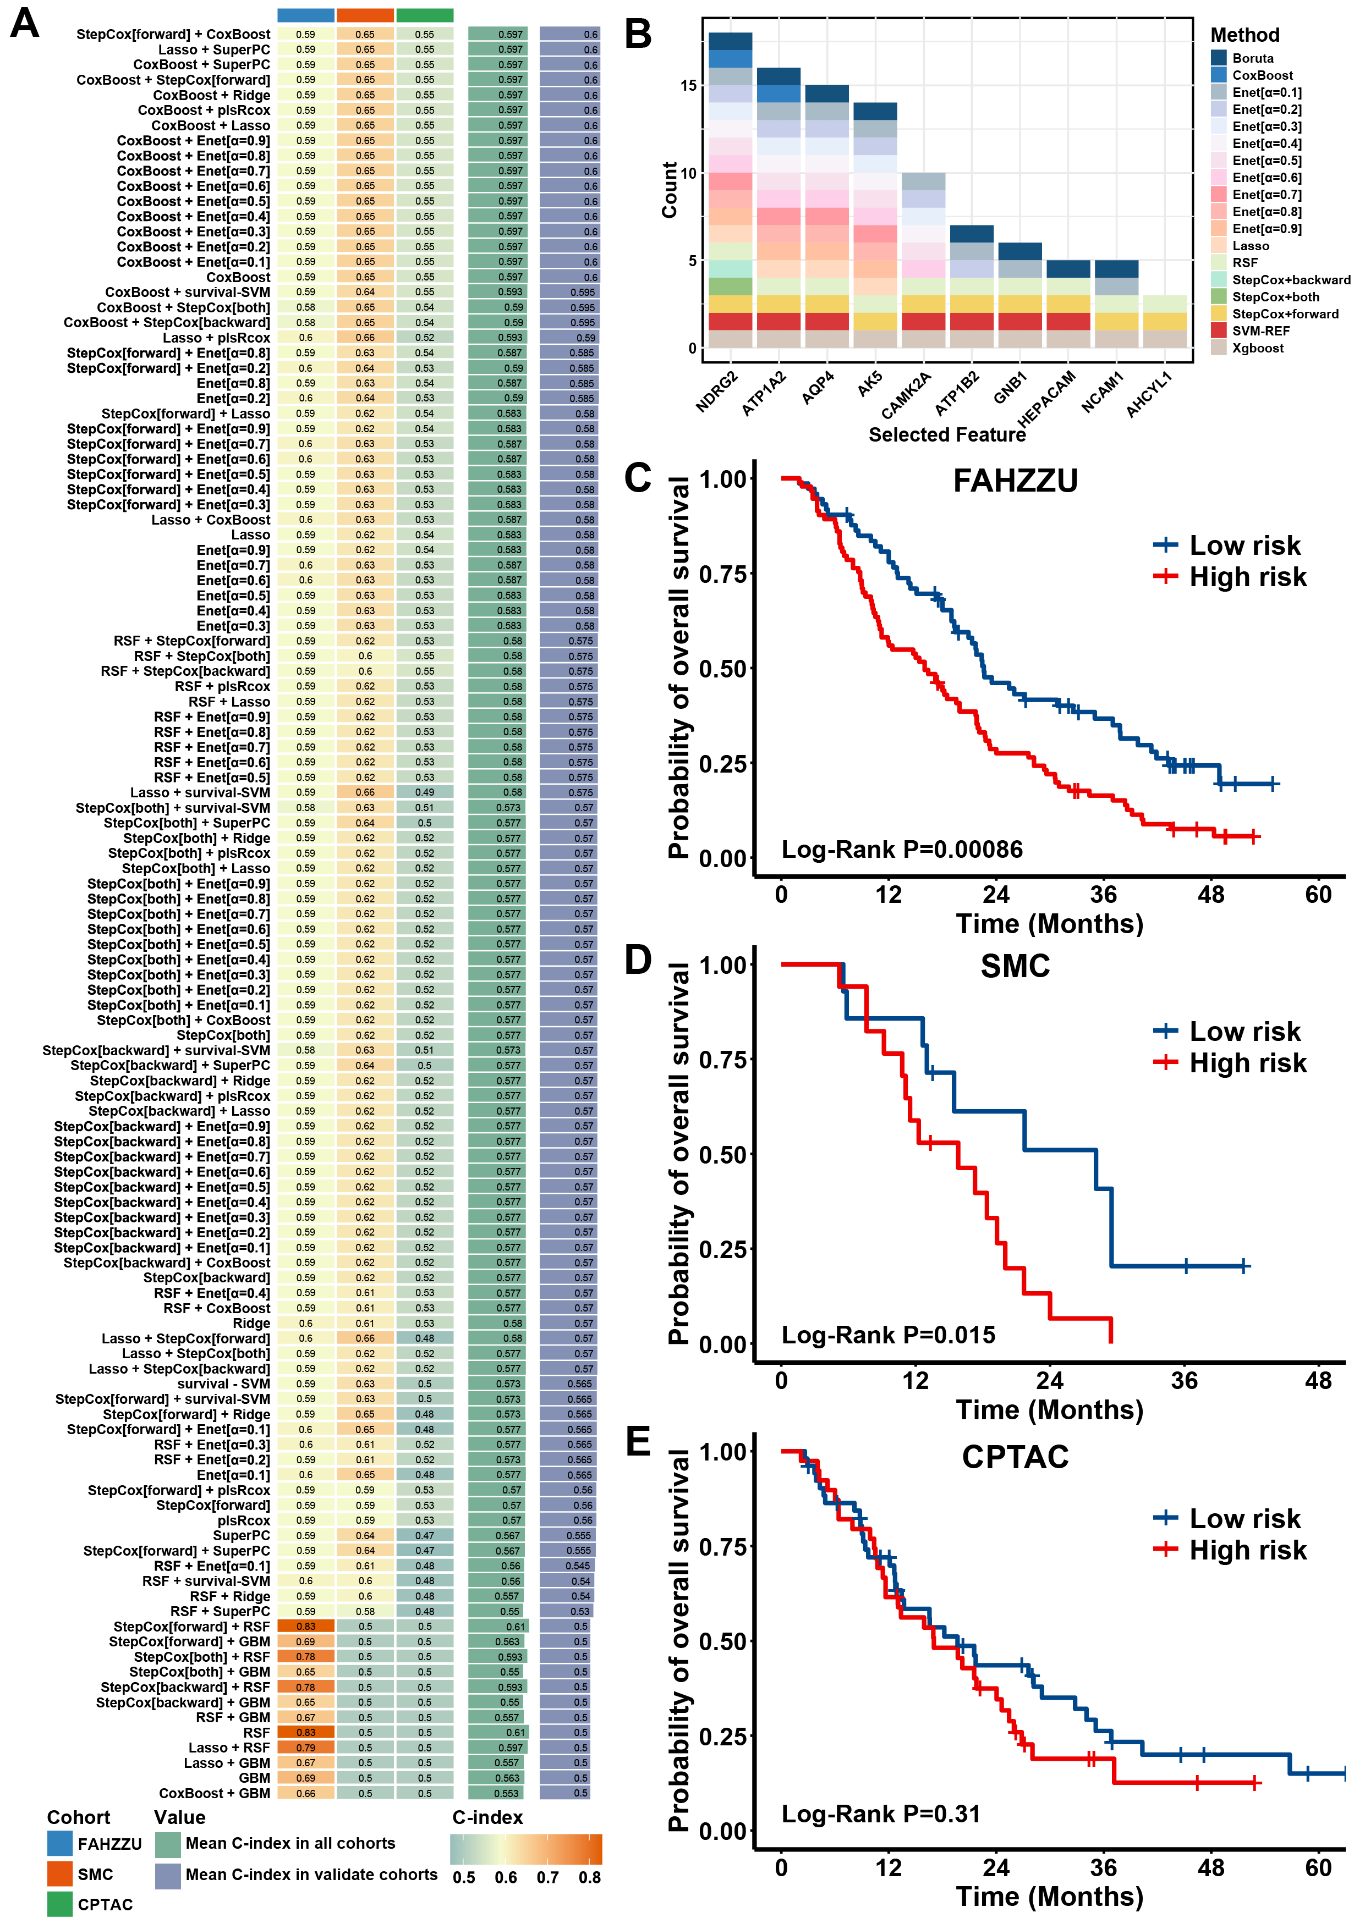


The process and results of modeling and validating the Protein model.

(A) The C-index of 101 combinatorial models based on 10 different algorithms.

(B) Core prognostic features of the Protein model.

(C) KM analysis validation based on Protein data from the FAHZZU cohort.

(D) KM analysis validation based on Protein data from the SMC cohort.

(E) KM analysis validation based on Protein data from the CPTAC cohort.

Fig. S4.


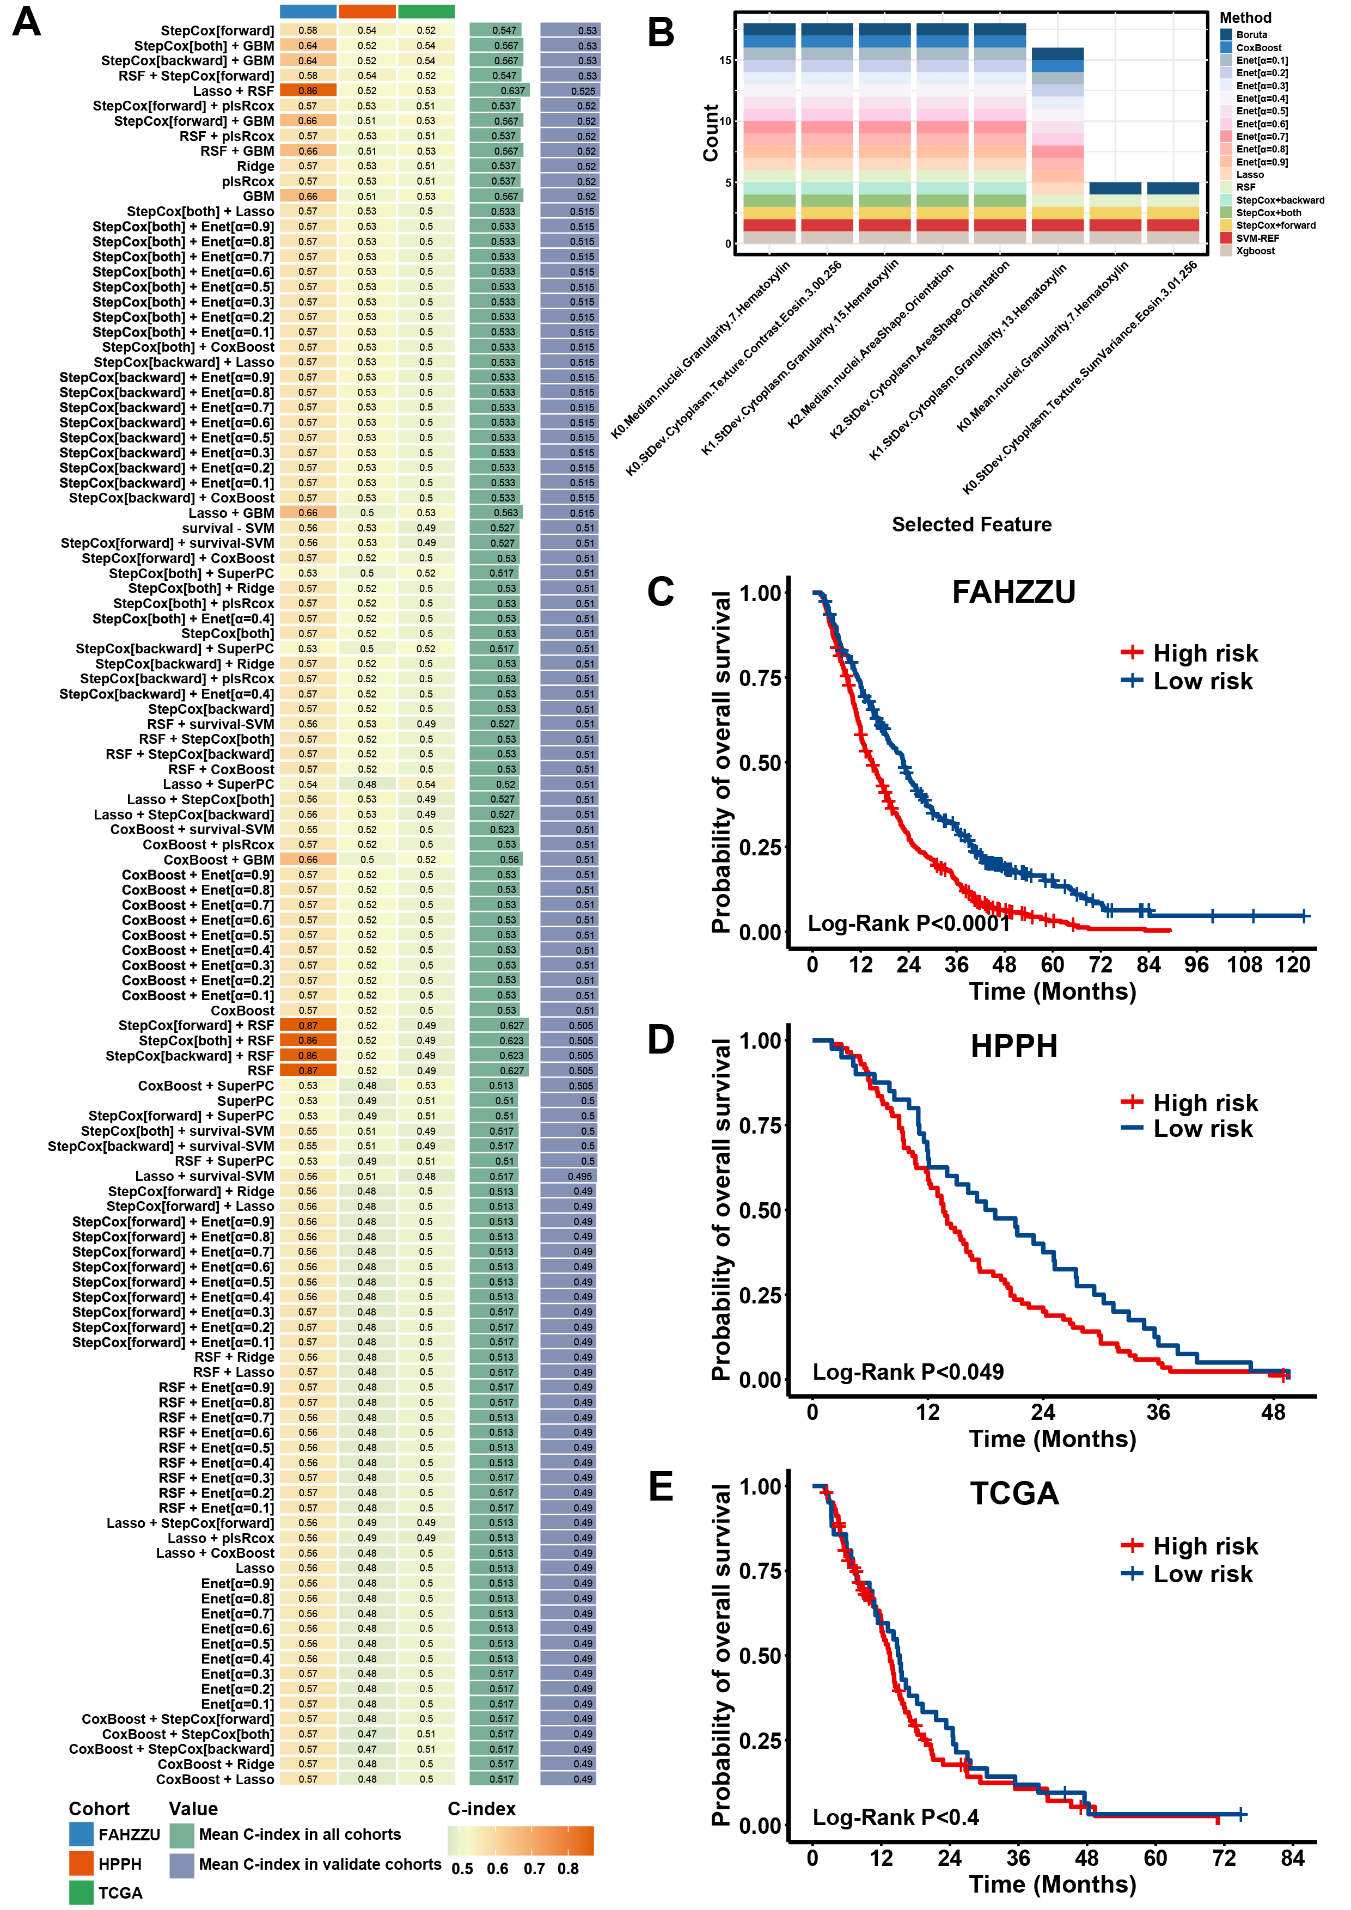


The process and results of modeling and validating the Pathology model.

(A) The C-index of 101 combinatorial models based on 10 different algorithms.

(B) Core prognostic features of the Pathology model.

(C) KM analysis validation based on Pathology data from the FAHZZU cohort.

(D) KM analysis validation based on Pathology data from the HPPH cohort.

(E) KM analysis validation based on Pathology data from the TCGA cohort.

Fig. S5.


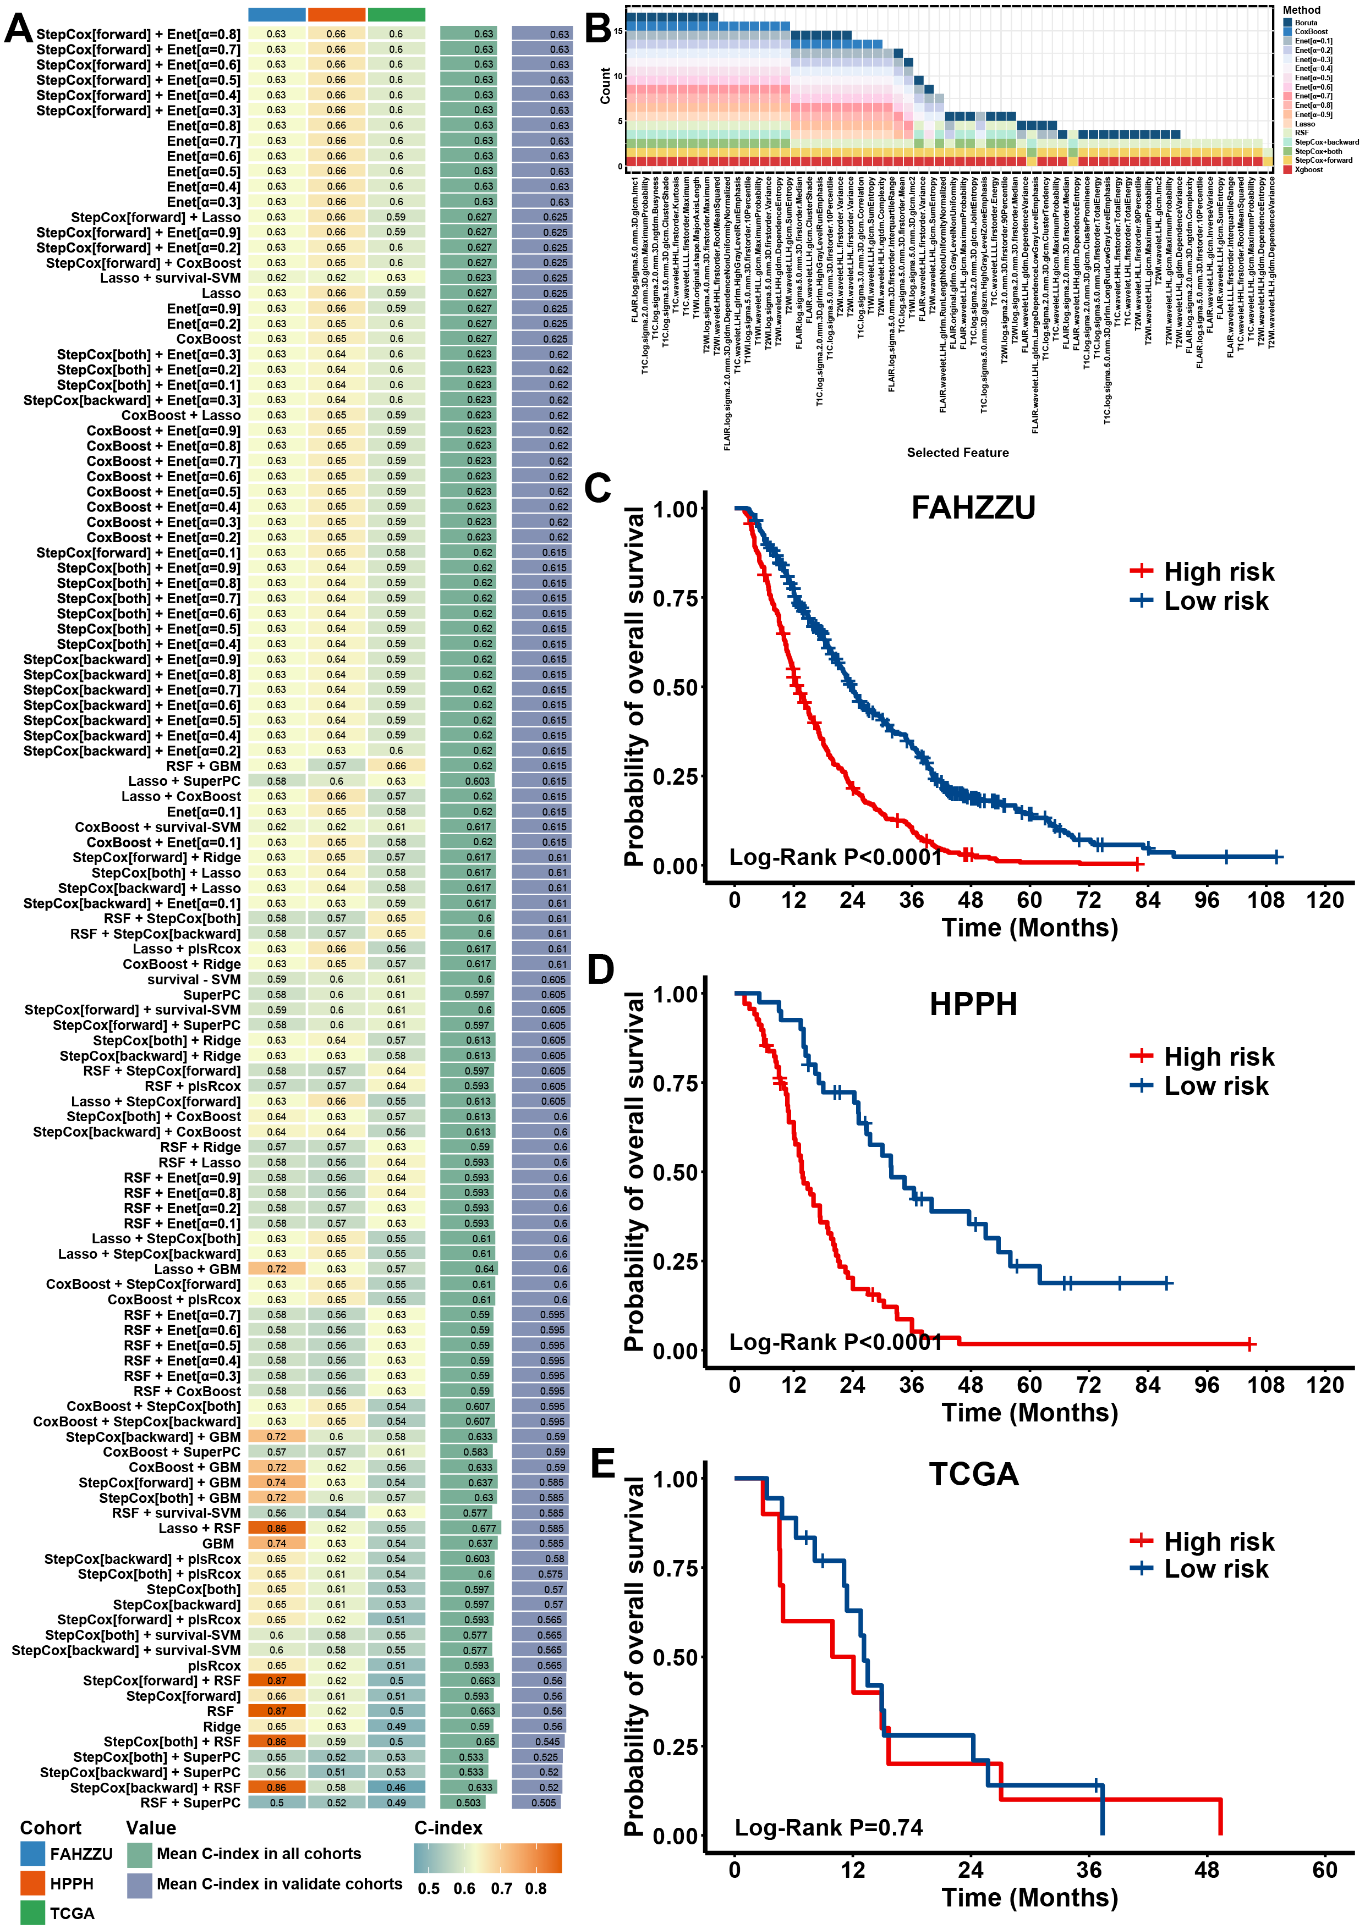


The process and results of modeling and validating the MRI model.

(A) The C-index of 101 combinatorial models based on 10 different algorithms.

(B) Core prognostic features of the MRI model.

(C) KM analysis validation based on MRI data from the FAHZZU cohort.

(D) KM analysis validation based on MRI data from the HPPH cohort.

(E) KM analysis validation based on MRI data from the TCGA cohort.

Fig. S6.


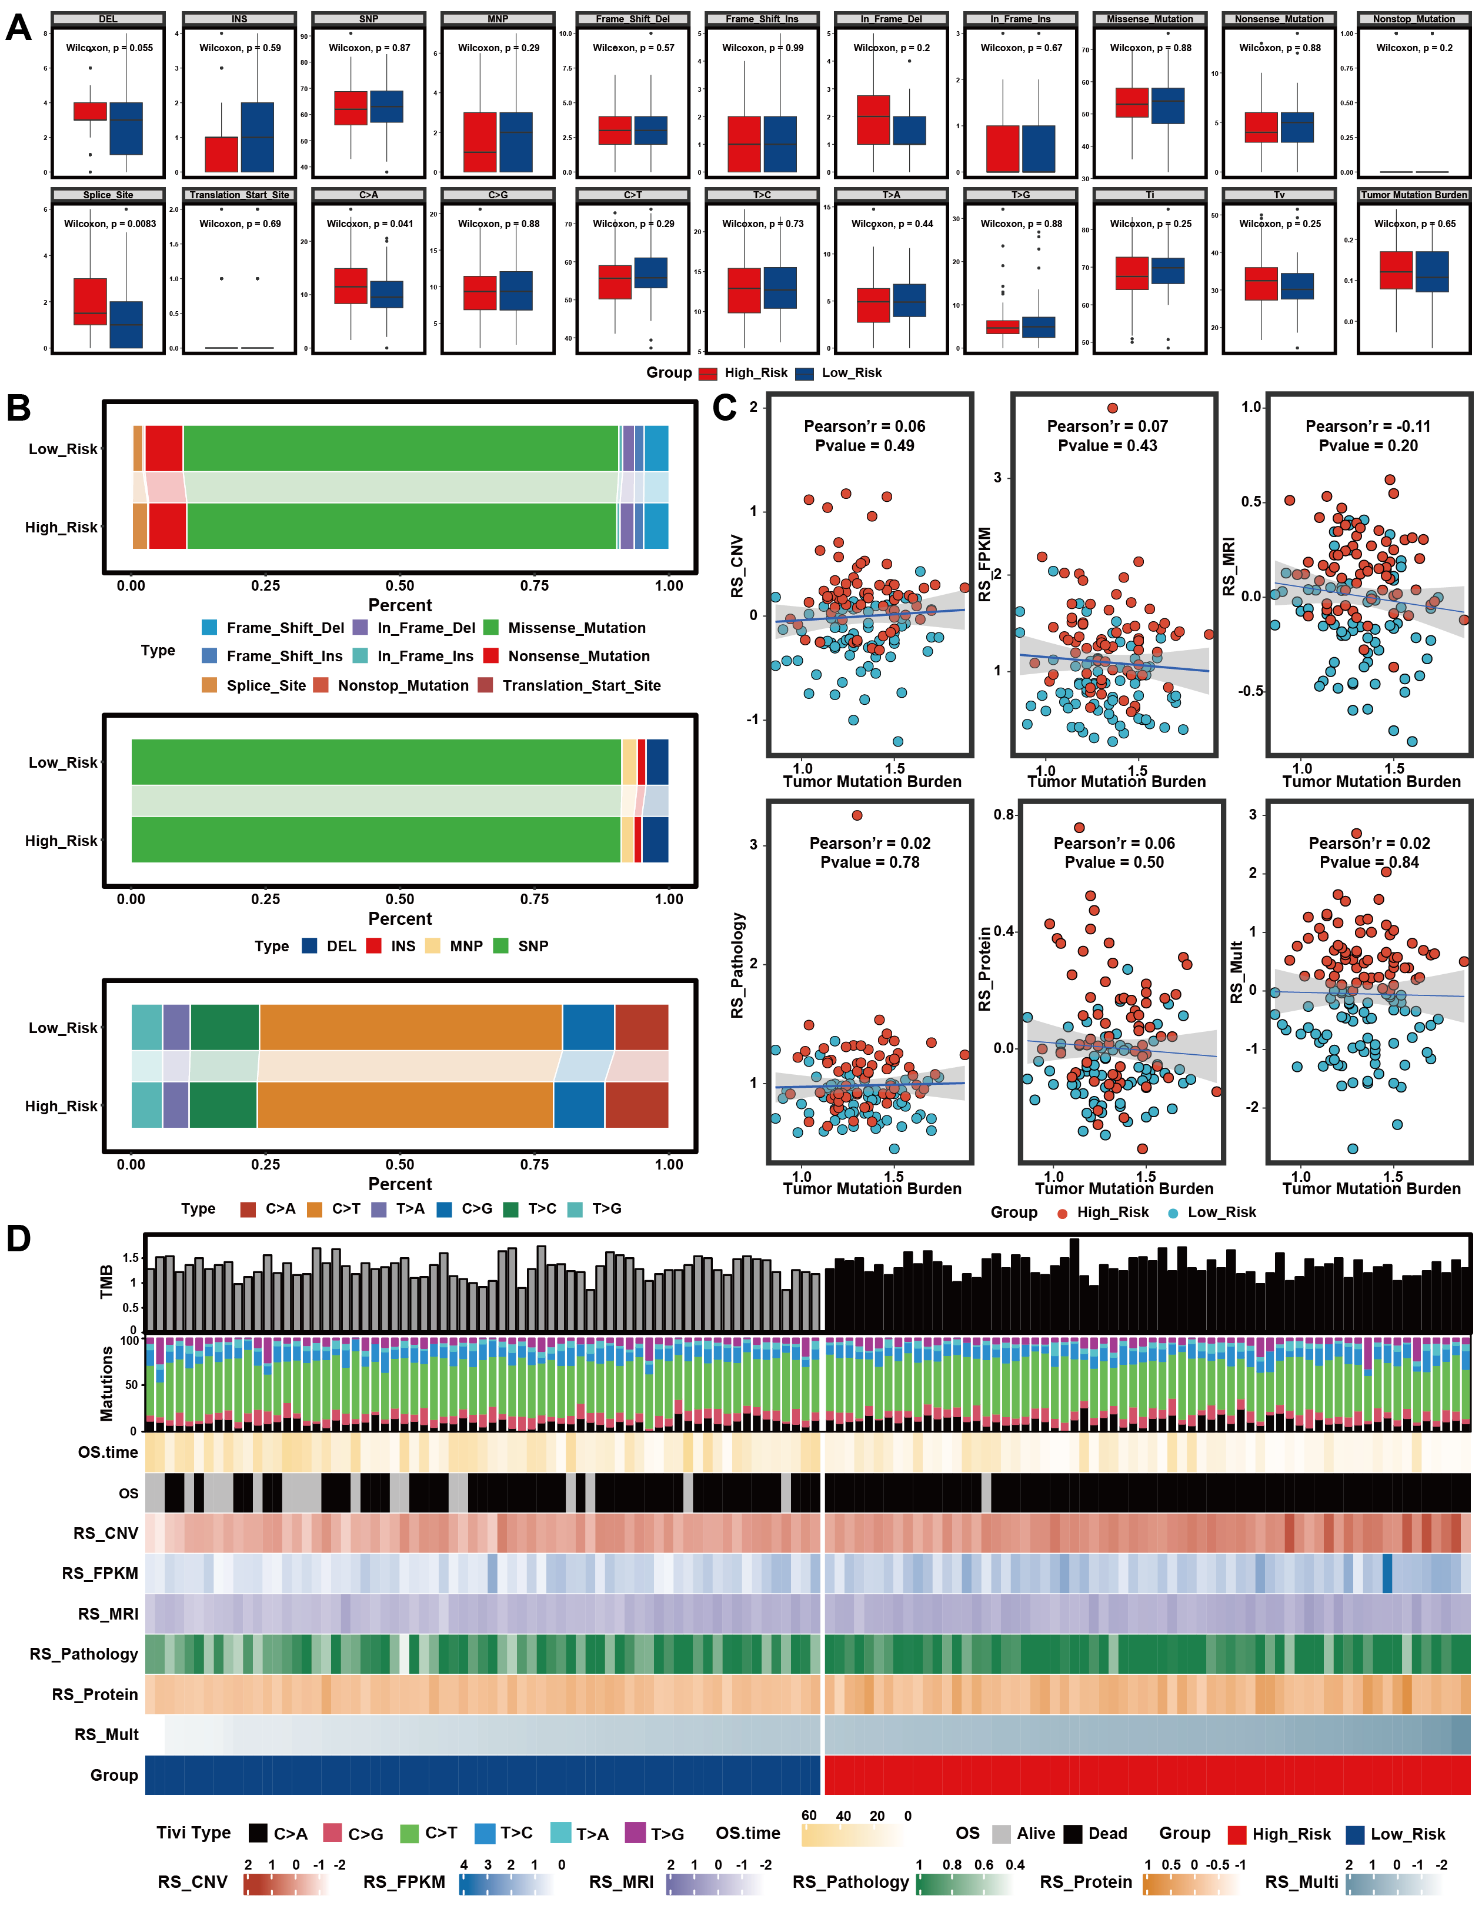


Heterogeneity analysis of gene mutation types between high- and low-risk groups based on genomic data.

(A) The differences in various gene mutation types and mutation burden across different risk groups.

(B) Overview of the proportional distribution of different gene mutation types between high- and low-risk groups.

(C) Dot plots illustrate the conclusions of Pearson correlation analysis between risk scores at different omics levels and tumor mutation burden.

(D) Landscape of various omics risk scores and gene mutation situation of patients in the multi-omics cohort.

Fig. S7.


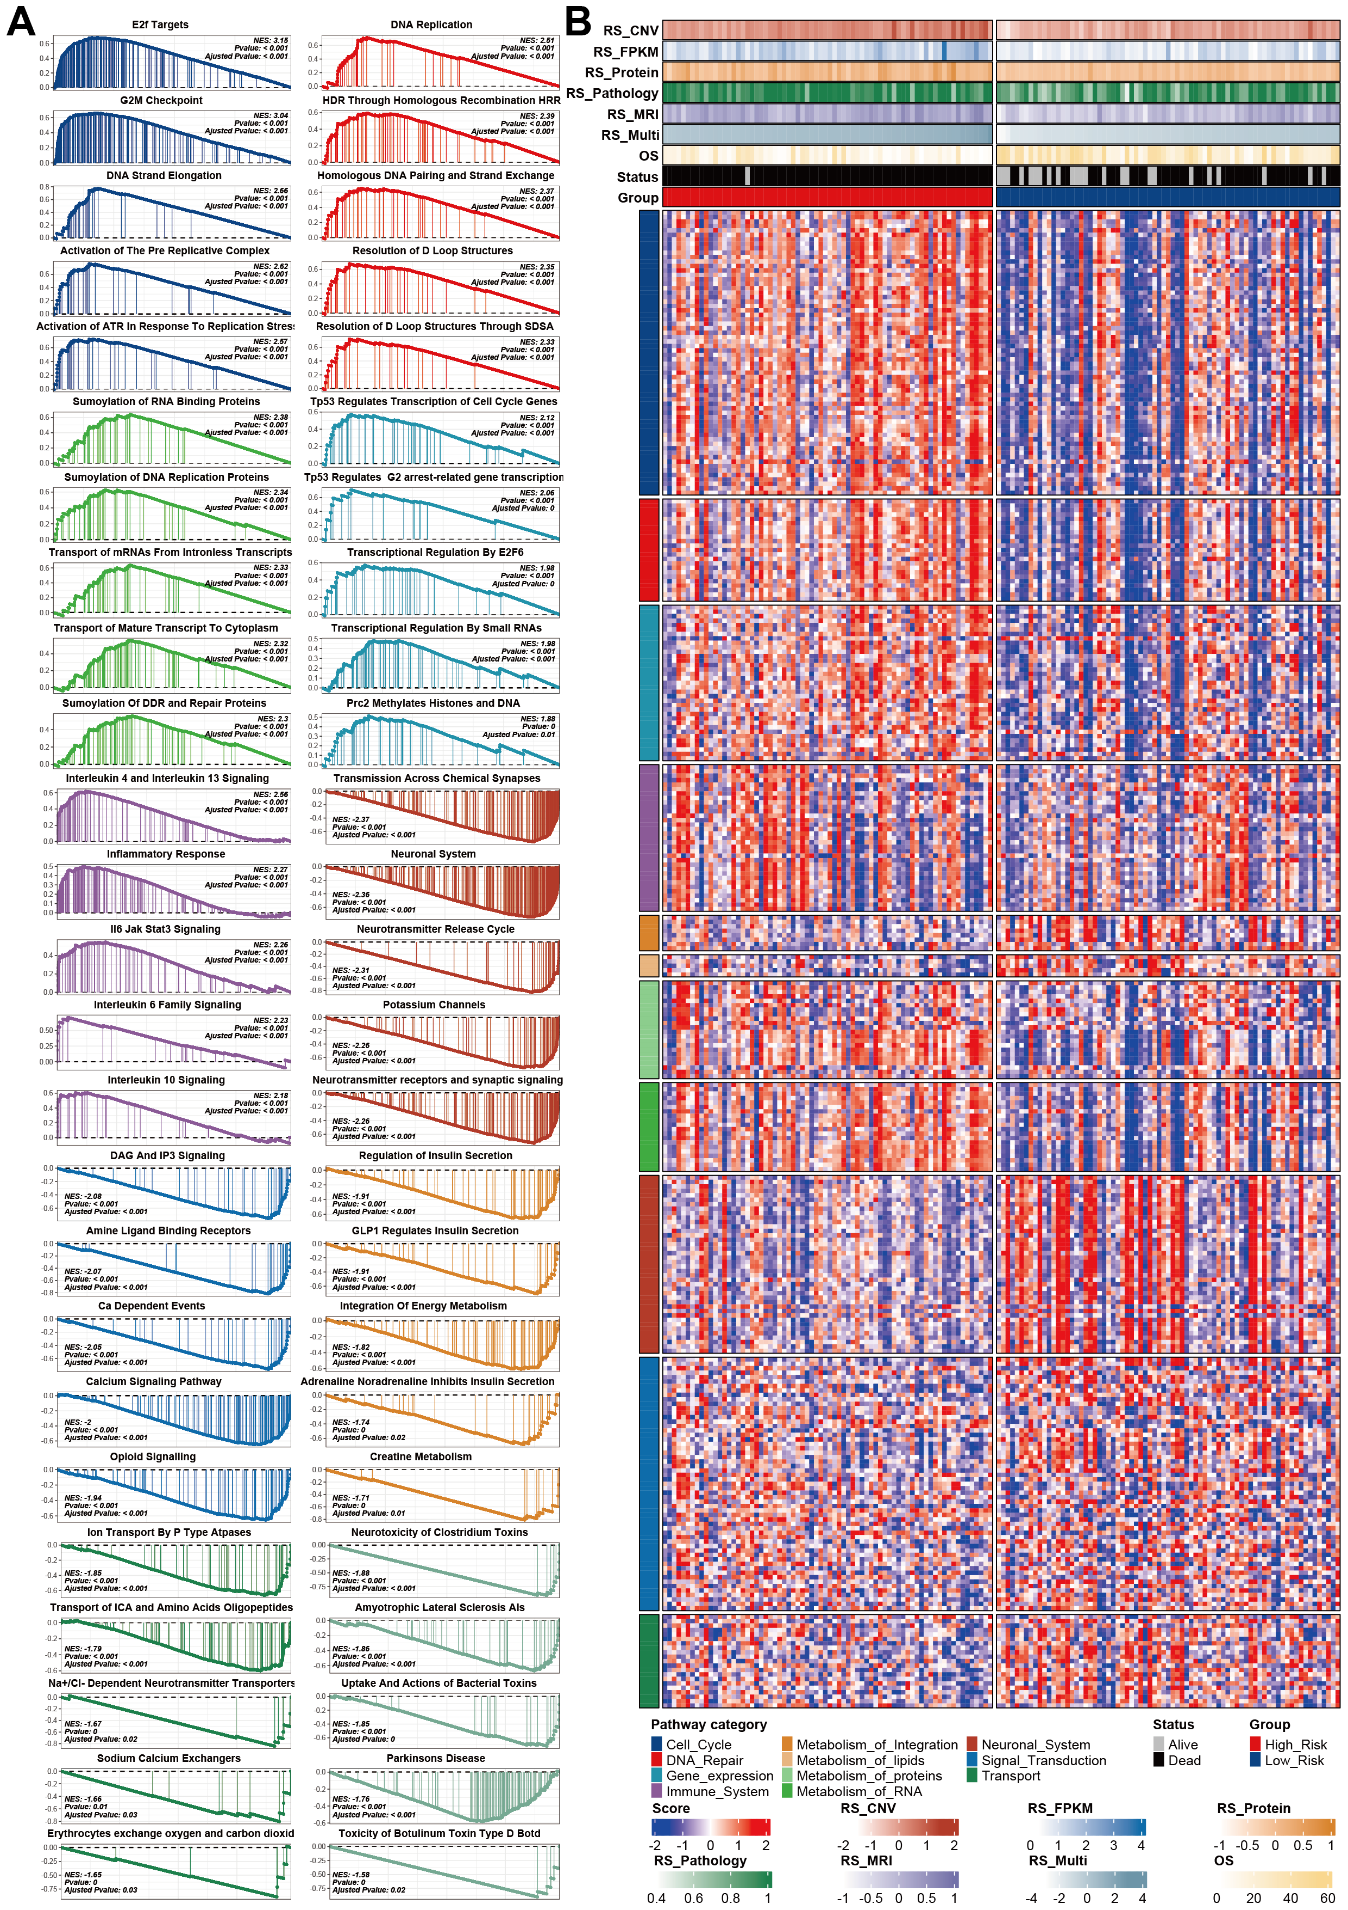


Functional enrichment analysis of integrated transcriptomic data.

(A) The top 5 pathways from each category identified through Gene Set Enrichment Analysis (GSEA) based on transcriptomic data.

(B) Pathway heatmap shows the activation of various types of pathways in different risk groups.

Fig. S8.


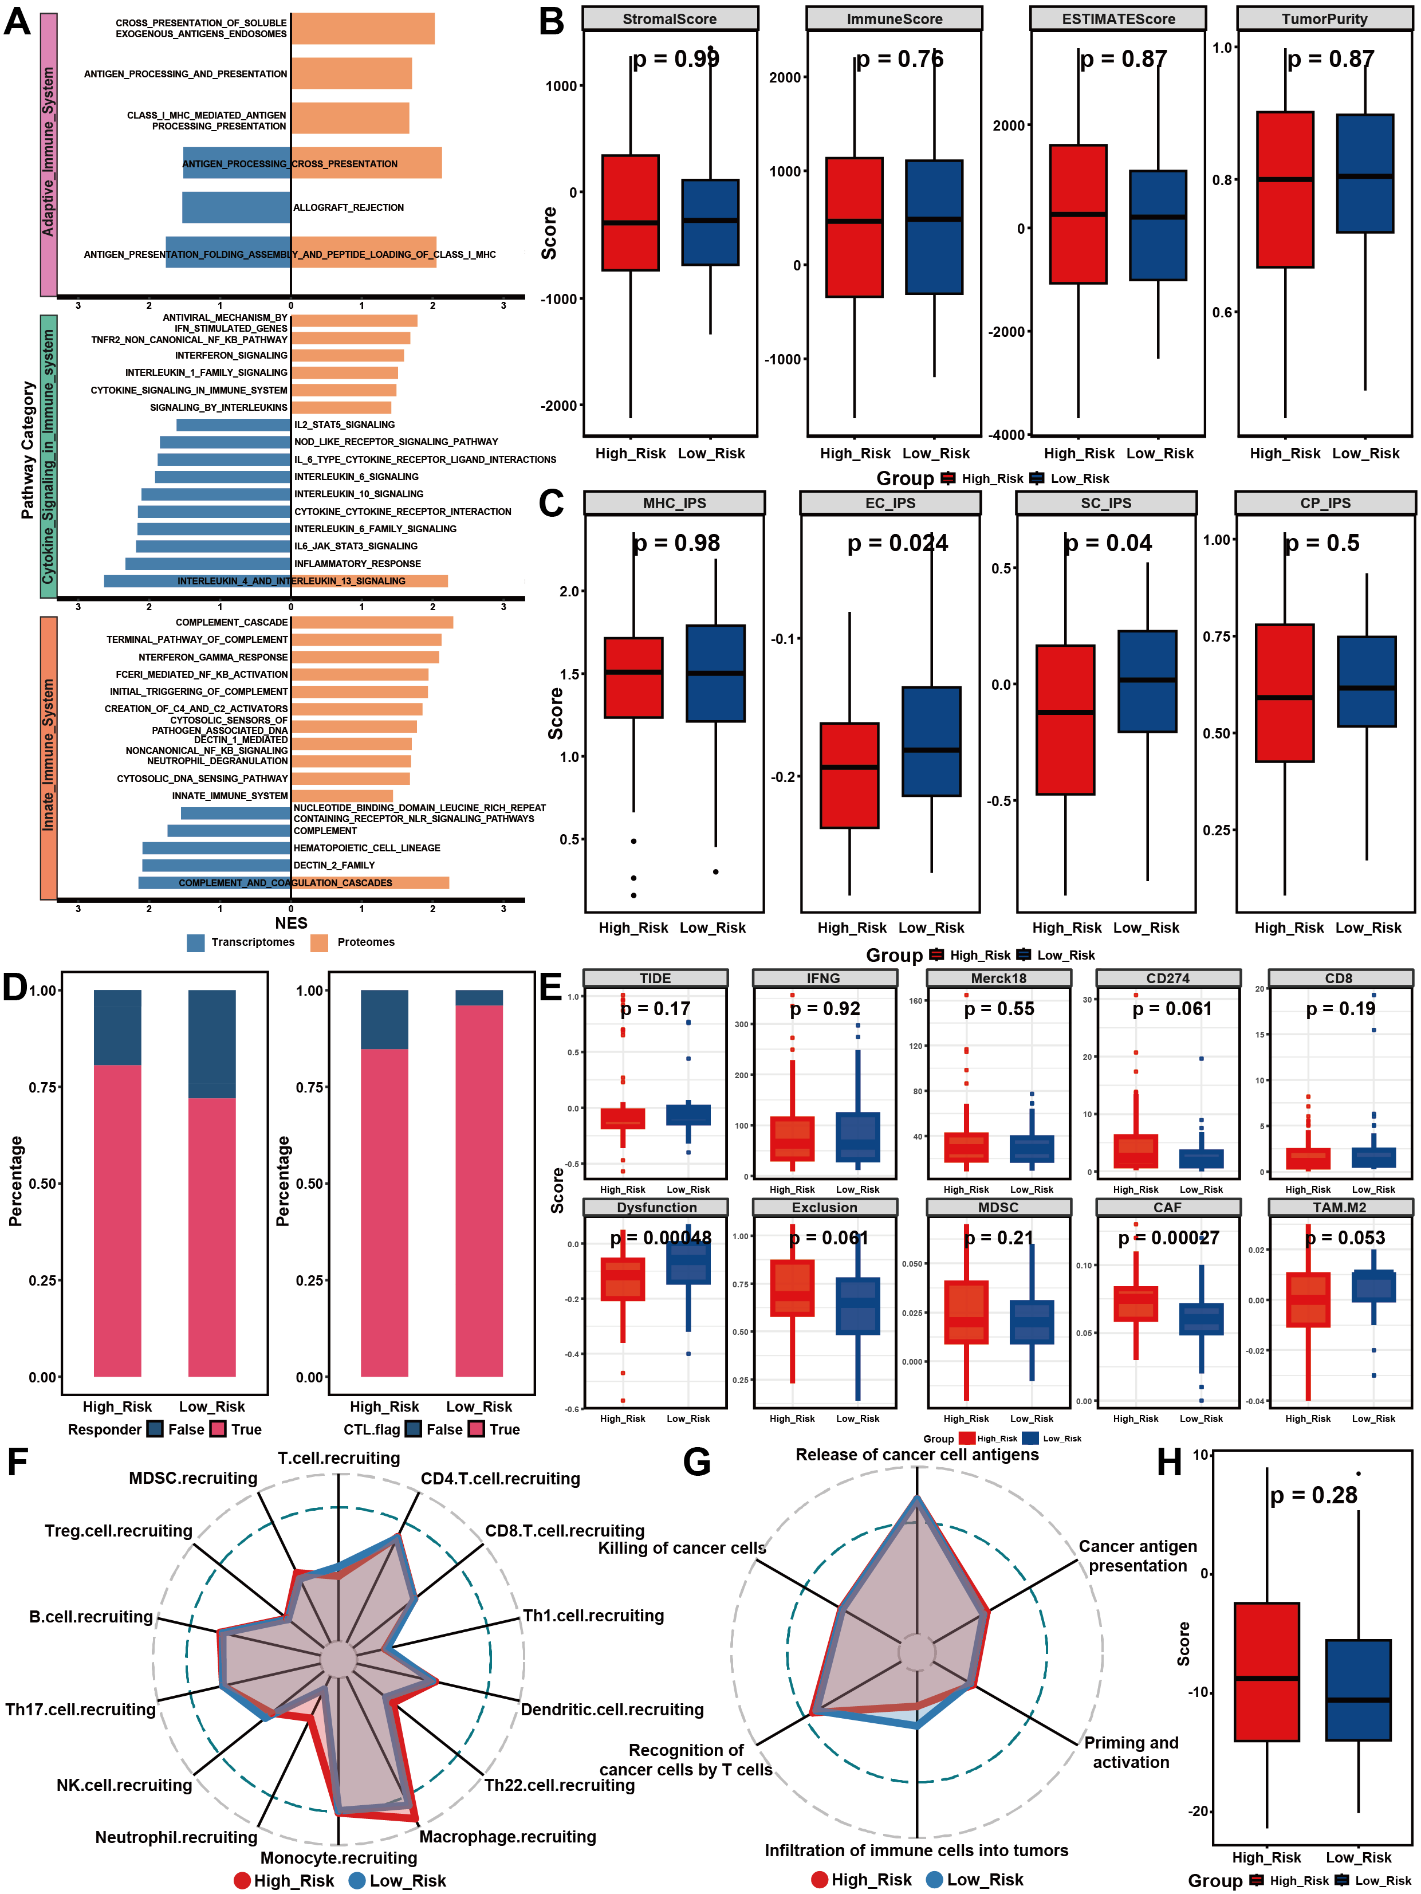


Immunological analysis among patients stratified by different risk groups.

(A) The bar chart illustrates that the majority of active immune-related pathways identified in the Gene Set Enrichment Analysis (GSEA) analysis are enriched in high-risk patients.

(B) The boxplot presents the results of the ESTIMATE analysis, including immune scores and stromal scores, which were further utilized to infer tumor purity.

(C) The boxplot illustrates the results of the immunophenoscore analysis, including antigen presentation scores, effector cell scores, inhibitory cell scores, and checkpoint scores.

(D) The stacked bar chart depicts the infiltration levels of cytotoxic T lymphocytes (CTLs) and the predicted likelihood of immune response in patients, as assessed by the Tumor Immune Dysfunction and Exclusion (TIDE) analysis.

(E) The boxplot illustrates the infiltration levels of common immune targets identified through the Tumor Immune Dysfunction and Exclusion (TIDE) analysis.

(F) The radar chart illustrates step four of the Cancer-Immunity Cycle (CIC) analysis, detailing the process of T cell migration to tumor tissues.

(G) The radar chart presents the differential scores of the remaining six steps of the Cancer-Immunity Cycle (CIC) analysis between high-risk and low-risk groups.

(H) The box plot demonstrates the disparity in the overall immune activity score of the tumor immunophenotype between high- and low-risk groups, as assessed by TIP analysis.

Fig. S9.


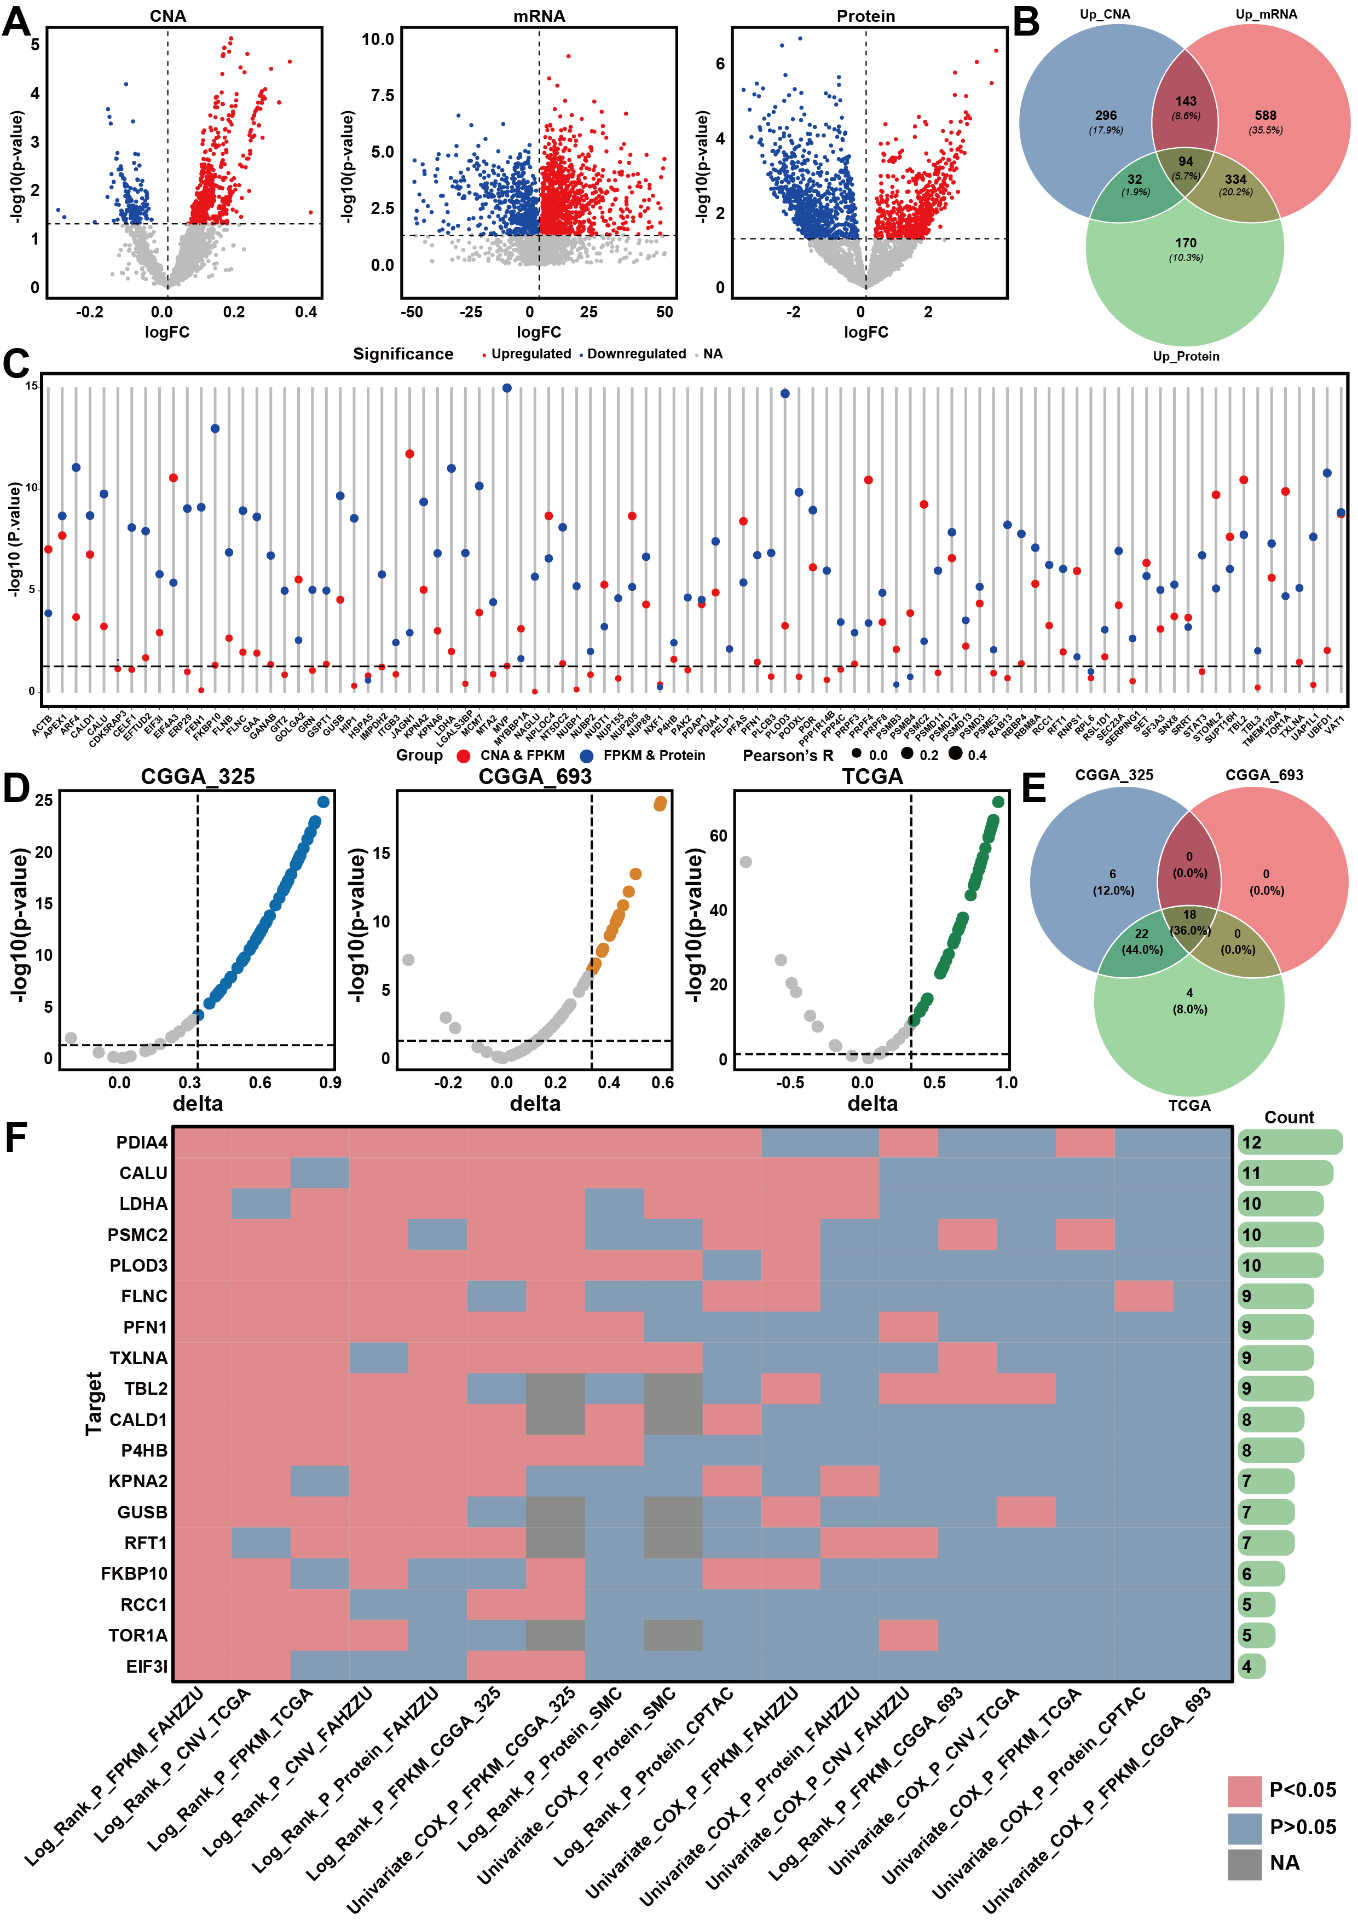


The specific process of target selection.

(A) The volcano plot displays the differential analysis results between the high-risk and low-risk groups across the three omics (CNA, mRNA, and Protein).

(B) The Venn diagram illustrates the intersecting set of genes with high expression across the three omics (CNA, mRNA, and Protein) in the high-risk group.

(C) The lollipop chart displays the results of the correlation analysis between CNA, mRNA, and Protein.

(D) The dot plot presents the genes identified in the previous analysis, displaying those with significantly higher mRNA expression levels in GBM compared to LGG across the TCGA and CGGA datasets.

(E) The Venn diagram illustrates the intersecting set of genes across the TCGA and CGGA datasets.

(F) The heatmap presents the genes identified in the previous analysis, displaying their prognostic value across multiple datasets and multi-omics data.

Data S1. (separate file)

Clinical information of patients from the FAHZZU cohort.

Data S2. (separate file)

Sequence information for cell-based mechanistic experiments.
